# Supplementary material for: In silicoestimation of chemical aquatic toxicity on crustaceans using chemical category methods
Source: Royal Society of Chemistry journal article supplement (doi:10.1039/c8em00220g), 2018-01-01
Supplement: c8em00220g1.xlsx [file c8em00220g1.xlsx]

## Sheet: Daphnia magna-binary
CAS	Canonical_Smiles	toxicity(PPM)	endpoint	biclass	Training set/ Test set
119-32-4	Cc1ccc(N)cc1[N+](=O)[O-]	14.2	EC50	0	Test set
69377-81-7	Nc1c(Cl)c(F)nc(OCC(=O)O)c1Cl	100	EC50	0	Test set
138-22-7	CCCCOC(=O)C(C)O	423	EC50	0	Test set
40596-69-8	COC(C)(C)CCCC(C)C\C=C\C(=C\C(=O)OC(C)C)\C	0.89	EC50	1	Test set
2634-33-5	O=C1NSc2ccccc12	4.4	EC50	1	Test set
122-11-2	COc1cc(NS(=O)(=O)c2ccc(N)cc2)nc(OC)n1	270	EC50	0	Test set
131-11-3	COC(=O)c1ccccc1C(=O)OC	45.9	EC50	0	Test set
2855-13-2	CC1(C)CC(N)CC(C)(CN)C1	17.4	EC50	0	Test set
84-65-1	O=C1c2ccccc2C(=O)c3ccccc13	0.230836	EC50	1	Test set
79-11-8	OC(=O)CCl	77	EC50	0	Test set
82-68-8	[O-][N+](=O)c1c(Cl)c(Cl)c(Cl)c(Cl)c1Cl	0.77	EC50	1	Test set
71662-11-8	[O-][N+](=O)c1oc(\C=N\N2C[C@@H](CN3CCOCC3)OC2=O)cc1	101.78	EC50	0	Test set
74223-64-6	COC(=O)c1ccccc1S(=O)(=O)NC(=O)Nc2nc(C)nc(OC)n2	150	EC50	0	Test set
123-33-1	O=C1NNC(=O)C=C1	107.5	EC50	0	Test set
107-13-1	C=CC#N	7.38	EC50	1	Test set
121-75-5	CCOC(=O)CC(SP(=S)(OC)OC)C(=O)OCC	0.00353483	EC50	1	Test set
145-73-3	OC(=O)C1C2CCC(O2)C1C(=O)O	32.5	EC50	0	Test set
55335-06-3	OC(=O)COc1nc(Cl)c(Cl)cc1Cl	132.9	EC50	0	Test set
57-13-6	NC(=O)N	3910	EC50	0	Test set
51235-04-2	CN(C)C1=NC(=O)N(C2CCCCC2)C(=O)N1C	85	EC50	0	Test set
144-62-7	OC(=O)C(=O)O	136.9	EC50	0	Test set
19666-30-9	CC(C)Oc1cc(N2N=C(OC2=O)C(C)(C)C)c(Cl)cc1Cl	0.53	EC50	1	Test set
56634-95-8	CCCCCCC(=O)Oc1c(Br)cc(cc1Br)C#N	0.031	EC50	1	Test set
99-06-9	OC(=O)c1cccc(O)c1	1550	EC50	0	Test set
20543-04-8	CCCCCCCC(=O)O	0.012	EC50	1	Test set
114-07-8	CC[C@H]1OC(=O)[C@H](C)[C@@H](O[C@H]2C[C@@](C)(OC)[C@@H](O)[C@H](C)O2)[C@H](C)[C@@H](O[C@@H]3O[C@H](C)C[C@@H]([C@H]3O)N(C)C)[C@](C)(O)C[C@@H](C)C(=O)[C@H](C)[C@@H](O)[C@]1(C)O	207.83	EC50	0	Test set
3691-35-8	Clc1ccc(cc1)C(C(=O)C2C(=O)c3ccccc3C2=O)c4ccccc4	0.426	EC50	1	Test set
109-66-0	CCCCC	9.74009	EC50	1	Test set
92-48-8	Cc1ccc2OC(=O)C=Cc2c1	40.5228	EC50	0	Test set
7173-51-5	CCCCCCCCCC[N+](C)(C)CCCCCCCCCC	0.018	EC50	1	Test set
70630-17-0	COCC(=O)N([C@H](C)C(=O)OC)c1c(C)cccc1C	113	EC50	0	Test set
151-21-3	CCCCCCCCCCCCOS(=O)(=O)O	6	EC50	1	Test set
122836-35-5	CC1=NN(C(=O)N1C(F)F)c2cc(NS(=O)(=O)C)c(Cl)cc2Cl	60.4	EC50	0	Test set
61116-07-2	CC(=O)OO	0.73	EC50	1	Test set
530-57-4	COc1cc(cc(OC)c1O)C(=O)O	1330	EC50	0	Test set
490-79-9	OC(=O)c1cc(O)ccc1O	402.55	EC50	0	Test set
81-81-2	CC(=O)CC(C1=C(O)Oc2ccccc2C1=O)c3ccccc3	130	EC50	0	Test set
111-76-2	CCCCOCCO	1000	EC50	0	Test set
1330-78-5	Cc1ccc(OP(=O)(Oc2ccc(C)cc2)Oc3ccc(C)cc3)cc1	3.6	EC50	1	Test set
114369-43-6	Clc1ccc(CCC(Cn2cncn2)(C#N)c3ccccc3)cc1	2.3	EC50	1	Test set
9003-13-8	CCCCOCC(C)OCC(C)O	95	EC50	0	Test set
375-95-1	OC(=O)C(F)(F)C(F)(F)C(F)(F)C(F)(F)C(F)(F)C(F)(F)C(F)(F)C(F)(F)F	151.289	EC50	0	Test set
55512-33-9	CCCCCCCCSC(=O)Oc1cc(Cl)nnc1c2ccccc2	1.08	EC50	1	Test set
74-83-9	CBr	2.6	EC50	1	Test set
6283-86-9	CCCCC(CC)COC(=O)C(C)O	83	EC50	0	Test set
1263-89-4	NC[C@@H]1O[C@H](O[C@H]2[C@@H](O)C(O[C@@H]3[C@@H](O)[C@H](N)C[C@H](N)C3O[C@H]4O[C@H](CO)[C@@H](O)[C@H](O)[C@H]4N)O[C@@H]2CO)[C@H](N)[C@@H](O)[C@@H]1O	502.78	EC50	0	Test set
79277-27-3	COC(=O)c1sccc1S(=O)(=O)NC(=O)Nc2nc(C)nc(OC)n2	1000	EC50	0	Test set
96-45-7	S=C1NCCN1	26.9	EC50	0	Test set
10380-28-6	Oc1cccc2cccnc12	0.162	EC50	1	Test set
99-92-3	CC(=O)c1ccc(N)cc1	5	EC50	1	Test set
65-30-5	CN1CCCC1c2cccnc2	3.25	EC50	1	Test set
3759-92-0	[O-][N+](=O)c1oc(\C=N\N2CC(CN3CCOCC3)OC2=O)cc1	115.55	EC50	0	Test set
10543-57-4	CC(=O)N(CCN(C(=O)C)C(=O)C)C(=O)C	1000	EC50	0	Test set
302-17-0	OC(O)C(Cl)(Cl)Cl	500	EC50	0	Test set
3209-22-1	[O-][N+](=O)c1cccc(Cl)c1Cl	1.6	EC50	1	Test set
24544-04-5	CC(C)c1cccc(C(C)C)c1N	15	EC50	0	Test set
108-85-0	BrC1CCCCC1	2.3	EC50	1	Test set
950-37-8	COC1=NN(CSP(=S)(OC)OC)C(=O)S1	0.0119	EC50	1	Test set
1982-49-6	CC1CCCCC1NC(=O)Nc2ccccc2	13.7	EC50	0	Test set
2058-94-8	OC(=O)C(F)(F)C(F)(F)C(F)(F)C(F)(F)C(F)(F)C(F)(F)C(F)(F)C(F)(F)C(F)(F)C(F)(F)F	133.125	EC50	0	Test set
1404-04-2	NC[C@@H]1OC(O[C@H]2[C@@H](O)[C@H](O[C@@H]3[C@@H](O)[C@H](N)C[C@H](N)[C@H]3O[C@H]4O[C@H](CN)[C@@H](O)[C@H](O)[C@H]4N)O[C@@H]2CO)[C@H](N)[C@@H](O)[C@@H]1O	42.1	EC50	0	Test set
15299-99-7	CCN(CC)C(=O)C(C)Oc1cccc2ccccc12	14.3	EC50	0	Test set
53112-28-0	Cc1cc(C)nc(Nc2ccccc2)n1	3.04	EC50	1	Test set
56-72-4	CCOP(=S)(OCC)Oc1ccc2C(=C(Cl)C(=O)Oc2c1)C	0.000192	EC50	1	Test set
55-63-0	[O-][N+](=O)OCC(CO[N+](=O)[O-])O[N+](=O)[O-]	46	EC50	0	Test set
443-48-1	Cc1ncc([N+](=O)[O-])n1CCO	1000	EC50	0	Test set
500008-45-7	CNC(=O)c1cc(Cl)cc(C)c1NC(=O)c2cc(Br)nn2c3ncccc3Cl	0.0071	EC50	1	Test set
53780-36-2	CC(=O)Nc1cc(NS(=O)(=O)C(F)(F)F)c(C)cc1C	103	EC50	0	Test set
76703-62-3	CC1(C)[C@@H](\C=C(/Cl)\C(F)(F)F)[C@H]1C(=O)O[C@H](C#N)c2cccc(Oc3ccccc3)c2	0.0001	EC50	1	Test set
64902-72-3	COc1nc(C)nc(NC(=O)NS(=O)(=O)c2ccccc2Cl)n1	370	EC50	0	Test set
16245-79-7	CCCCCCCCc1ccc(N)cc1	0.02	EC50	1	Test set
3064-70-8	ClC(Cl)(Cl)S(=O)(=O)C(Cl)(Cl)Cl	0.173	EC50	1	Test set
79-01-6	ClC=C(Cl)Cl	7.75189	EC50	1	Test set
111-90-0	CCOCCOCCO	3996.37	EC50	0	Test set
65-85-0	OC(=O)c1ccccc1	100	EC50	0	Test set
39148-24-8	CCOP(=O)=O	304	EC50	0	Test set
65343-67-1	CCOC(=O)C(C)Oc1ccc(O)cc1	70	EC50	0	Test set
107-02-8	C=CC=O	0.093	EC50	1	Test set
69-53-4	CC1(C)S[C@@H]2[C@H](NC(=O)[C@H](N)c3ccccc3)C(=O)N2[C@H]1C(=O)O	1000	EC50	0	Test set
243973-20-8	CCc1cc(C)cc(CC)c1C2=C(OC(=O)C(C)(C)C)N3CCOCCN3C2=O	2.05	EC50	1	Test set
62924-70-3	CCN(Cc1c(F)cccc1Cl)c2c(cc(cc2[N+](=O)[O-])C(F)(F)F)[N+](=O)[O-]	0.0028	EC50	1	Test set
110-88-3	C1OCOCO1	15200	EC50	0	Test set
732-11-6	COP(=S)(OC)SCN1C(=O)c2ccccc2C1=O	0.024	EC50	1	Test set
115-20-8	OCC(Cl)(Cl)Cl	148.059	EC50	0	Test set
7779-27-3	CCN1CN(CC)CN(CC)C1	15.3	EC50	0	Test set
39300-45-3	C\C=C\C(=O)Oc1ccccc1[N+](=O)[O-]	0.0042	EC50	1	Test set
106-49-0	Cc1ccc(N)cc1	0.12	EC50	1	Test set
28553-12-0	CC(C)CCCCCCOC(=O)c1ccccc1C(=O)OCCCCCCC(C)C	0.06	EC50	1	Test set
287-92-3	C1CCCC1	10.5199	EC50	0	Test set
107-41-5	CC(O)CC(C)(C)O	3200	EC50	0	Test set
701-82-6	NC(=O)Nc1cccc(O)c1	93	EC50	0	Test set
549-18-8	CN(C)CCC=C1c2ccccc2CCc3ccccc13	4.82	EC50	1	Test set
62571-86-2	C[C@H](CS)C(=O)N1CCC[C@H]1C(=O)O	100	EC50	0	Test set
79-09-4	CCC(=O)O	22.7	EC50	0	Test set
547-64-8	COC(=O)C(C)O	780	EC50	0	Test set
21535-47-7	CN1CCN2C(C1)c3ccccc3Cc4ccccc24	7.81	EC50	1	Test set
14062-34-1	NNC(=O)c1cccc(N)c1	2.3	EC50	1	Test set
556-61-6	CN=C=S	0.055	EC50	1	Test set
27304-13-8	ClC1C2C(C3OC13Cl)C4(Cl)C(=C(Cl)C2(Cl)C4(Cl)Cl)Cl	1.3	EC50	1	Test set
68424-85-1	CCCCCCCCCCCCCC[N+](C)(C)Cc1ccccc1	0.037	EC50	1	Test set
110-96-3	CC[C@@H](C)N[C@@H](C)CC	35	EC50	0	Test set
99607-70-2	CCCCCC(C)OC(=O)COc1ccc(Cl)c2cccnc12	79.6	EC50	0	Test set
76-03-9	OC(=O)C(Cl)(Cl)Cl	146	EC50	0	Test set
92-24-0	c1ccc2cc3cc4ccccc4cc3cc2c1	0.00232854	EC50	1	Test set
76738-62-0	CC(C)(C)[C@@H](O)C(Cc1ccc(Cl)cc1)n2cncn2	94	EC50	0	Test set
29122-68-7	CC(C)NCC(O)COc1ccc(CC(=O)N)cc1	313	EC50	0	Test set
5538-94-3	CCCCCCCC[N+](C)(C)CCCCCCCC	0.1	EC50	1	Test set
62-74-8	OC(=O)CF	350	EC50	0	Test set
141776-32-1	CCS(=O)(=O)c1nc2ccccn2c1S(=O)(=O)NC(=O)Nc3nc(OC)cc(OC)n3	96	EC50	0	Test set
52508-35-7	CC1(C)OC[C@@H]2O[C@]3(OC(C)(C)O[C@H]3[C@@H]2O1)C(=O)O	10000	EC50	0	Test set
55219-65-3	CC(C)(C)C(O)C(Oc1ccc(Cl)cc1)n2cncn2	2.5	EC50	1	Test set
136-45-8	CCCOC(=O)c1ccc(nc1)C(=O)OCCC	18	EC50	0	Test set
68-22-4	C[C@]12CC[C@H]3[C@@H](CCC4=CC(=O)CC[C@H]34)[C@@H]1CC[C@@]2(O)C#C	6.41	EC50	1	Test set
2303-17-5	CC(C)N(C(C)C)C(=O)SCC(=C(Cl)Cl)Cl	0.43	EC50	1	Test set
6382-06-5	CCCCCOC(=O)C(C)O	238	EC50	0	Test set
68-12-2	CN(C)C=O	15700	EC50	0	Test set
88-75-5	Oc1ccccc1[N+](=O)[O-]	17	EC50	0	Test set
114311-32-9	COCc1cnc(C2=NC(=O)C(C)(N2)C(C)C)c(c1)C(=O)O	122	EC50	0	Test set
219714-96-2	COc1cnc(OC)n2nc(NS(=O)(=O)c3c(OCC(F)F)cccc3C(F)(F)F)nc12	90.1	EC50	0	Test set
111-18-2	CN(C)CCCCCCN(C)C	6.94	EC50	1	Test set
53404-22-1	CC(Oc1cccc(Cl)c1)C(=O)O	902	EC50	0	Test set
610-02-6	OC(=O)c1ccc(O)c(O)c1O	11.7	EC50	0	Test set
149-91-7	OC(=O)c1cc(O)c(O)c(O)c1	19.1	EC50	0	Test set
26644-46-2	ClC(Cl)(Cl)C(NC=O)N1CCN(CC1)C(NC=O)C(Cl)(Cl)Cl	9.7	EC50	1	Test set
25812-30-0	Cc1ccc(C)c(OCCCC(C)(C)C(=O)O)c1	22.85	EC50	0	Test set
68-35-9	Nc1ccc(cc1)S(=O)(=O)Nc2ncccn2	212	EC50	0	Test set
55297-96-6	CCN(CC)CCSCC(=O)O[C@@H]1C[C@@](C)(C=C)[C@@H](O)[C@H](C)C23CC[C@@H](C)C1(C)[C@H]2C(=O)CC3	40	EC50	0	Test set
99-50-3	OC(=O)c1ccc(O)c(O)c1	370	EC50	0	Test set
93106-60-6	CCN1CCN(CC1)c2cc3N(C=C(C(=O)O)C(=O)c3cc2F)C4CC4	20.1	EC50	0	Test set
19932-84-4	Oc1oc2cc(Cl)ccc2n1	8.4	EC50	1	Test set
335-67-1	OC(=O)C(F)(F)C(F)(F)C(F)(F)C(F)(F)C(F)(F)C(F)(F)C(F)(F)F	476.52	EC50	0	Test set
78-93-3	CCC(=O)C	5091	EC50	0	Test set
617-51-6	CC(C)OC(=O)C(C)O	802	EC50	0	Test set
58-14-0	CCc1nc(N)nc(N)c1c2ccc(Cl)cc2	4.8	EC50	1	Test set
112281-77-3	FC(F)C(F)(F)OCC(Cn1cncn1)c2ccc(Cl)cc2Cl	2.63	EC50	1	Test set
208465-21-8	COC(=O)c1ccc(CNS(=O)(=O)C)cc1S(=O)(=O)NC(=O)Nc2nc(OC)cc(OC)n2	90.2	EC50	0	Test set
621-77-2	CCCCCN(CCCCC)CCCCC	1.6	EC50	1	Test set
253-52-1	c1ccc2cnncc2c1	445	EC50	0	Test set
10453-86-8	CC(=CC1C(C(=O)OCc2coc(Cc3ccccc3)c2)C1(C)C)C	0.00022	EC50	1	Test set
4658-28-0	CSc1nc(NC(C)C)nc(N=[N+]=[N-])n1	26	EC50	0	Test set
25154-52-3	CCCCCCCCCc1ccccc1O	0.104	EC50	1	Test set
220899-03-6	COc1cc(C)c(C(=O)c2c(C)c(Br)ccc2OC)c(OC)c1OC	92	EC50	0	Test set
60-57-1	ClC1=C(Cl)C2(Cl)C3C4CC(C5OC45)C3C1(Cl)C2(Cl)Cl	0.0795	EC50	1	Training set
303-07-1	OC(=O)c1c(O)cccc1O	10.6	EC50	0	Training set
709-98-8	CCC(=O)Nc1ccc(Cl)c(Cl)c1	6.7	EC50	1	Training set
67-66-3	ClC(Cl)Cl	51.5713	EC50	0	Training set
101-54-2	Nc1ccc(Nc2ccccc2)cc1	0.37	EC50	1	Training set
105-39-5	CCOC(=O)CCl	1.6	EC50	1	Training set
1861-32-1	COC(=O)c1c(Cl)c(Cl)c(C(=O)OC)c(Cl)c1Cl	138	EC50	0	Training set
9016-45-9	CCCCCCCCCc1ccc(OCCOCCO)cc1	12.2	EC50	0	Training set
111-77-3	COCCOCCO	930	EC50	0	Training set
77182-82-2	CP(=O)(O)CCC(N)C(=O)O	15	EC50	0	Training set
24017-47-8	CCOP(=S)(OCC)Oc1ncn(n1)c2ccccc2	0.01292	EC50	1	Training set
145701-23-1	COc1ncc(F)c2nc(nn12)S(=O)(=O)Nc3c(F)cccc3F	5.5	EC50	1	Training set
303-38-8	OC(=O)c1cccc(O)c1O	447	EC50	0	Training set
59756-60-4	CN1C=C(C(=O)C(=C1)c2cccc(c2)C(F)(F)F)c3ccccc3	3	EC50	1	Training set
7166-19-0	[O-][N+](=O)\C(=C/c1ccccc1)\Br	0.024	EC50	1	Training set
82027-59-6	OCCN(CCO)CCO	55.7	EC50	0	Training set
67747-09-5	CCCN(CCOc1c(Cl)cc(Cl)cc1Cl)C(=O)n2ccnc2	3.008	EC50	1	Training set
1610-18-0	COc1nc(NC(C)C)nc(NC(C)C)n1	59.8	EC50	0	Training set
4684-94-0	OC(=O)c1cccc(Cl)n1	1.6	EC50	1	Training set
13826-35-2	OCc1cccc(Oc2ccccc2)c1	0.05	EC50	1	Training set
203313-25-1	CCOC(=O)OC1=C(C(=O)N[C@@]12CC[C@@H](CC2)OC)c3cc(C)ccc3C	42.7	EC50	0	Training set
111-26-2	CCCCCCN	8.6	EC50	1	Training set
100-09-4	COc1ccc(cc1)C(=O)O	943	EC50	0	Training set
115136-53-3	CC(C)C1(C)N=C(NC1=O)c2nc(C)ccc2C(=O)O	100	EC50	0	Training set
112410-23-8	CCc1ccc(cc1)C(=O)NN(C(=O)c2cc(C)cc(C)c2)C(C)(C)C	3.8	EC50	1	Training set
330-95-0	[O-][N+](=O)c1ccc(NC(=O)Nc2ccc(cc2)[N+](=O)[O-])cc1	93	EC50	0	Training set
81777-89-1	CC1(C)CON(Cc2ccccc2Cl)C1=O	5.2	EC50	1	Training set
527-60-6	Cc1cc(C)c(O)c(C)c1	3.3	EC50	1	Training set
110-95-2	CN(C)CCCN(C)C	52.8	EC50	0	Training set
112-27-6	OCCOCCOCCO	52400	EC50	0	Training set
143-27-1	CCCCCCCCCCCCCCCCN	0.0036	EC50	1	Training set
21087-64-9	CSC1=NN=C(C(=O)N1N)C(C)(C)C	4.18	EC50	1	Training set
100784-20-1	COC(=O)c1c(Cl)nn(C)c1S(=O)(=O)NC(=O)Nc2nc(OC)cc(OC)n2	107	EC50	0	Training set
51707-55-2	O=C(Nc1ccccc1)Nc2cnns2	5.7	EC50	1	Training set
94-82-6	OC(=O)CCCOc1ccc(Cl)cc1Cl	25	EC50	0	Training set
15922-78-8	ON1C=CC=CC1=S	0.022	EC50	1	Training set
767-00-0	Oc1ccc(cc1)C#N	15	EC50	0	Training set
2122-70-5	CCOC(=O)Cc1cccc2ccccc12	23.8	EC50	0	Training set
26225-79-6	CCOC1Oc2ccc(OS(=O)(=O)C)cc2C1(C)C	64	EC50	0	Training set
110-16-7	OC(=O)\C=C\C(=O)O	316.2	EC50	0	Training set
78491-02-8	OCNC(=O)N(CO)C1N(CO)C(=O)N(CO)C1=O	58	EC50	0	Training set
94-75-7	OC(=O)COc1ccc(Cl)cc1Cl	100	EC50	0	Training set
80-32-0	Nc1ccc(cc1)S(=O)(=O)Nc2ccc(Cl)nn2	375.3	EC50	0	Training set
131929-60-7	CC[C@H]1CCC[C@H](O[C@H]2CC[C@@H]([C@@H](C)O2)N(C)C)[C@@H](C)C(=O)C3=C[C@H]4[C@@H]5C[C@@H](C[C@H]5C=C[C@H]4[C@@H]3CC(=O)O1)O[C@@H]6O[C@@H](C)[C@H](OC)[C@@H](OC)[C@H]6OC	6.5	EC50	1	Training set
98-95-3	[O-][N+](=O)c1ccccc1	34.6	EC50	0	Training set
61718-82-9	COCCCC\C(=N/OCCN)\c1ccc(cc1)C(F)(F)F	13	EC50	0	Training set
126-33-0	O=S1(=O)CCCC1	94	EC50	0	Training set
139968-49-3	FC(F)(F)Oc1ccc(NC(=O)N\N=C(\Cc2ccc(cc2)C#N)/c3cccc(c3)C(F)(F)F)cc1	0.331	EC50	1	Training set
27314-13-2	CNC1=C(Cl)C(=O)N(N=C1)c2cccc(c2)C(F)(F)F	15	EC50	0	Training set
71-23-8	CCCO	3644	EC50	0	Training set
7775-09-9	OCl(=O)=O	919.3	EC50	0	Training set
79-33-4	C[C@H](O)C(=O)O	750	EC50	0	Training set
64-19-7	CC(=O)O	65	EC50	0	Training set
658066-35-4	FC(F)(F)c1cnc(CCNC(=O)c2ccccc2C(F)(F)F)c(Cl)c1	17	EC50	0	Training set
298-46-4	NC(=O)N1c2ccccc2C=Cc3ccccc13	97.8154	EC50	0	Training set
85721-33-1	OC(=O)C1=CN(C2CC2)c3cc(N4CCNCC4)c(F)cc3C1=O	1	EC50	1	Training set
335104-84-2	CS(=O)(=O)c1ccc(C(=O)C2C(=O)CCCC2=O)c(Cl)c1COCC(F)(F)F	48.9	EC50	0	Training set
116-06-3	CNC(=O)O\N=C\C(C)(C)SC	0.4107	EC50	1	Training set
77-09-8	Oc1ccc(cc1)C2(OC(=O)c3ccccc23)c4ccc(O)cc4	6.72	EC50	1	Training set
115-77-5	OCC(CO)(CO)CO	33600	EC50	0	Training set
82633-79-2	CN1SC2=C(CCC2)C1=O	1.3	EC50	1	Training set
57966-95-7	CCNC(=O)NC(=O)\C(=N\OC)\C#N	28	EC50	0	Training set
129909-90-6	CC(C)C1=NN(C(=O)NC(C)(C)C)C(=O)N1N	40.8	EC50	0	Training set
59-06-3	CCOc1cc(NC(=O)C)ccc1C(=O)OC	170	EC50	0	Training set
556-88-7	NC(=N)N[N+](=O)[O-]	1024	EC50	0	Training set
2227-17-0	ClC1=C(Cl)C(Cl)(C(=C1Cl)Cl)C2(Cl)C(=C(Cl)C(=C2Cl)Cl)Cl	1.2	EC50	1	Training set
55406-53-6	CCCCNC(=O)OCC#CI	0.16	EC50	1	Training set
52-68-6	COP(=O)(OC)C(O)C(Cl)(Cl)Cl	0.00035	EC50	1	Training set
91-22-5	c1ccc2ncccc2c1	51.3	EC50	0	Training set
117-79-3	Nc1ccc2C(=O)c3ccccc3C(=O)c2c1	378	EC50	0	Training set
8000-48-4	CC12CCC(CC1)C(C)(C)O2	143.96	EC50	0	Training set
57-06-7	C=CCN=C=S	0.73	EC50	1	Training set
950782-86-2	CC(F)c1nc(N)nc(N[C@@H]2[C@@H](C)Cc3ccc(C)cc23)n1	9.88	EC50	1	Training set
34014-18-1	CNC(=O)N(C)c1nnc(s1)C(C)(C)C	297	EC50	0	Training set
1031-07-8	ClC1=C(Cl)C2(Cl)C3COS(=O)(=O)OCC3C1(Cl)C2(Cl)Cl	0.92	EC50	1	Training set
100473-08-3	O=P(Oc1ccccc1)(Oc2ccccc2)Oc3ccccc3	0.25	EC50	1	Training set
83-66-9	COc1c(c(C)c(cc1C(C)(C)C)[N+](=O)[O-])[N+](=O)[O-]	0.62	EC50	1	Training set
957-51-7	CN(C)C(=O)C(c1ccccc1)c2ccccc2	58	EC50	0	Training set
102-97-6	CC(C)NCc1ccccc1	38.5	EC50	0	Training set
26530-20-1	CN1SC=CC1=O	0.107	EC50	1	Training set
143390-89-0	CO\N=C(\C(=O)OC)/c1ccccc1COc2ccccc2C	0.332	EC50	1	Training set
1918-02-1	Nc1c(Cl)c(Cl)nc(C(=O)O)c1Cl	76	EC50	0	Training set
1138-52-9	CC(C)(C)c1cc(O)cc(c1)C(C)(C)C	1.7	EC50	1	Training set
112-30-1	CCCCCCCCCCO	6.51	EC50	1	Training set
105726-67-8	CCCC(CC)(CCC)C(=O)NC	130	EC50	0	Training set
616-09-1	CCCOC(=O)C(C)O	413	EC50	0	Training set
907204-31-3	Cn1cc(C(=O)Nc2ccccc2c3cc(F)c(F)c(F)c3)c(n1)C(F)F	104	EC50	0	Training set
124-18-5	CCCCCCCCCC	0.0284564	EC50	1	Training set
118-52-5	CC1(C)N(Cl)C(=O)N(Cl)C1=O	0.84	EC50	1	Training set
13071-79-9	CCOP(=S)(OCC)SCSC(C)(C)C	0.00031	EC50	1	Training set
66841-25-6	CC1(C)[C@@H](C(Br)C(Br)(Br)Br)[C@H]1C(=O)O[C@H](C#N)c2cccc(Oc3ccccc3)c2	0.055	EC50	1	Training set
75-87-6	ClC(Cl)(Cl)C=O	112	EC50	0	Training set
101-83-7	C1CCC(CC1)NC2CCCCC2	70.1	EC50	0	Training set
210880-92-5	CN=C(NCc1cnc(Cl)s1)N[N+](=O)[O-]	119	EC50	0	Training set
86209-51-0	COC(=O)c1ccccc1S(=O)(=O)NC(=O)Nc2nc(OC(F)F)cc(OC(F)F)n2	100	EC50	0	Training set
148-01-6	Cc1c(cc(cc1[N+](=O)[O-])[N+](=O)[O-])C(=O)N	155	EC50	0	Training set
12771-68-5	COc1ccc(cc1)C(O)(C2CC2)c3cncnc3	100	EC50	0	Training set
13171-21-6	CCN(CC)C(=O)\C(=C(/C)\OP(=O)(OC)OC)\Cl	0.0127	EC50	1	Training set
42017-89-0	CC(C)(Oc1ccc(cc1)C(=O)c2ccc(Cl)cc2)C(=O)O	4.9	EC50	1	Training set
96-09-3	C1OC1c2ccccc2	11.6	EC50	0	Training set
85-69-8	CCCCOC(=O)c1ccccc1C(=O)OCC(CC)CCCC	0.07	EC50	1	Training set
578-54-1	CCc1ccccc1N	14	EC50	0	Training set
33693-04-8	CCNc1nc(NC(C)(C)C)nc(OC)n1	44	EC50	0	Training set
4455-26-9	CCCCCCCCN(C)CCCCCCCC	0.12	EC50	1	Training set
87674-68-8	COCC(C)N(C(=O)CCl)c1c(C)csc1C	16	EC50	0	Training set
97780-06-8	CCOc1nc(NC)nc(NC(=O)NS(=O)(=O)c2ccccc2C(=O)OC)n1	550	EC50	0	Training set
53042-79-8	CCCC\C=C\CC\C=C/CCCCCCOC(=O)C	0.28	EC50	1	Training set
55179-31-2	CC(C)(C)C(O)C(Oc1ccc(cc1)c2ccccc2)n3cncn3	4.7	EC50	1	Training set
1897-45-6	Clc1c(Cl)c(C#N)c(Cl)c(C#N)c1Cl	0.18	EC50	1	Training set
35691-65-7	BrCC(Br)(CCC#N)C#N	2.2	EC50	1	Training set
107534-96-3	CC(C)(C)C(O)(CCc1ccc(Cl)cc1)Cn2cncn2	2.88	EC50	1	Training set
741-58-2	CC(C)OP(=S)(OC(C)C)SCCNS(=O)(=O)c1ccccc1	0.58	EC50	1	Training set
101-27-9	ClCC#CCOC(=O)Nc1cccc(Cl)c1	0.43	EC50	1	Training set
59-40-5	Nc1ccc(cc1)S(=O)(=O)Nc2cnc3ccccc3n2	131	EC50	0	Training set
26062-79-3	C[N+](C)(CC=C)CC=C	0.075	EC50	1	Training set
834-12-8	CCNc1nc(NC(C)C)nc(SC)n1	40	EC50	0	Training set
301-12-2	CCS(=O)CCSP(=O)(OC)OC	0.24	EC50	1	Training set
13684-63-4	COC(=O)Nc1cccc(OC(=O)Nc2cccc(C)c2)c1	14	EC50	0	Training set
88-72-2	Cc1ccccc1[N+](=O)[O-]	5.4	EC50	1	Training set
27519-02-4	CCCCCCCCCCCCC\C=C/CCCCCCCC	0.265	EC50	1	Training set
108-87-2	Cc1ccccc1	1.47279	EC50	1	Training set
43222-48-6	C[n+]1c(cc(c2ccccc2)n1C)c3ccccc3	2.53	EC50	1	Training set
83055-99-6	COC(=O)c1ccccc1CS(=O)(=O)NC(=O)Nc2nc(OC)cc(OC)n2	99	EC50	0	Training set
142-59-6	SC(=S)NCCNC(=S)S	5.6	EC50	1	Training set
67-72-1	ClC(Cl)(Cl)C(Cl)(Cl)Cl	1.8	EC50	1	Training set
606-20-2	Cc1c(cccc1[N+](=O)[O-])[N+](=O)[O-]	21.7	EC50	0	Training set
87820-88-0	CCO\N=C(/CC)\C1=C(O)CC(CC1=O)c2c(C)cc(C)cc2C	1.97	EC50	1	Training set
134098-61-6	Cc1nn(C)c(Oc2ccccc2)c1\C=N\OCc3ccc(cc3)C(=O)OC(C)(C)C	0.0036	EC50	1	Training set
2527-66-4	CN1Sc2ccccc2C1=O	0.92	EC50	1	Training set
66423-09-4	C[C@H](Oc1ccc(Cl)cc1C)C(=O)ON(C)C	256	EC50	0	Training set
84-66-2	CCOC(=O)c1ccccc1C(=O)OCC	86	EC50	0	Training set
361377-29-9	CO\N=C(\C1=NOCCO1)/c2ccccc2Oc3ncnc(Oc4ccccc4Cl)c3F	0.48	EC50	1	Training set
58138-08-2	Clc1cc(Cl)cc(c1)C2(CC(Cl)(Cl)Cl)CO2	0.25	EC50	1	Training set
90982-32-4	CCOC(=O)c1ccccc1S(=O)(=O)NC(=O)Nc2nc(Cl)cc(OC)n2	10	EC50	1	Training set
13311-84-7	CC(C)C(=O)Nc1ccc(c(c1)C(F)(F)F)[N+](=O)[O-]	2.7	EC50	1	Training set
126-11-4	OCC(CO)(CO)[N+](=O)[O-]	80	EC50	0	Training set
188489-07-8	CCOC(=O)COc1cc(N2N=CC(=C(C)C2=O)C(F)(F)F)c(F)cc1Cl	3	EC50	1	Training set
999-81-5	C[N+](C)(C)CCCl	16.7	EC50	0	Training set
74051-80-2	CCC\C(=N/OCC)\C1=C(O)C[C@@H](C[C@H](C)SCC)CC1=O	2.6	EC50	1	Training set
91-94-1	Nc1ccc(cc1Cl)c2ccc(N)c(Cl)c2	1.05	EC50	1	Training set
10265-92-6	COP(=O)(N)SC	0.026	EC50	1	Training set
31218-83-4	CCNP(=S)(OC)O\C(=C/C(=O)OC(C)C)\C	0.0033	EC50	1	Training set
11067-81-5	CC1Cc2c3C(C)Cc3c4C(C)C5(CC5C)c4c2S(=O)(=O)O1	4	EC50	1	Training set
367-25-9	Nc1ccc(F)cc1F	3.2	EC50	1	Training set
365400-11-9	Cc1nn(C)c(O)c1C(=O)c2ccc(cc2S(=O)(=O)C)C(F)(F)F	95.8	EC50	0	Training set
1689-84-5	Oc1c(Br)cc(cc1Br)C#N	74	EC50	0	Training set
74115-24-5	Clc1ccccc1c2nnc(nn2)c3ccccc3Cl	0.00084	EC50	1	Training set
117337-19-6	COC(=O)CSc1cc(N=C2SC(=O)N3CCCCN23)c(F)cc1Cl	2.3	EC50	1	Training set
115-31-1	CC1(C)[C@@H]2CC[C@]1(C)[C@H](C2)OC(=O)CSC#N	0.115	EC50	1	Training set
4180-23-8	COc1ccc(\C=C\C)cc1	4.25	EC50	1	Training set
58-08-2	CN1C(=O)N(C)c2ncn(C)c2C1=O	177.8	EC50	0	Training set
108-90-7	Clc1ccccc1	0.585296	EC50	1	Training set
107-07-3	OCCCl	212.556	EC50	0	Training set
700-38-9	Cc1ccc(c(O)c1)[N+](=O)[O-]	21.3	EC50	0	Training set
138-86-3	CC(=C)C1CCC(=CC1)C	39	EC50	0	Training set
94-13-3	CCCOC(=O)c1ccc(O)cc1	15.4	EC50	0	Training set
160-02-1	C1CC23C(=CC1=C4COC=C24)C=Cc5ccccc35	100	EC50	0	Training set
23422-53-9	CNC(=O)Oc1cccc(c1)N=CN(C)C	0.0868	EC50	1	Training set
619-24-9	[O-][N+](=O)c1cccc(c1)C#N	48.1	EC50	0	Training set
121-14-2	Cc1ccc(cc1[N+](=O)[O-])[N+](=O)[O-]	35	EC50	0	Training set
108731-70-0	CS(=O)(=O)NC(=O)c1cc(Oc2ccc(cc2Cl)C(F)(F)F)ccc1[N+](=O)[O-]	294	EC50	0	Training set
99-85-4	CC(C)C1=CCC(=CC1)C	3.45	EC50	1	Training set
7673-09-8	ClNc1nc(NCl)nc(NCl)n1	1.2	EC50	1	Training set
121-34-6	COc1cc(ccc1O)C(=O)O	908	EC50	0	Training set
28711-29-7	OC(=O)Cn1cncn1	108	EC50	0	Training set
144550-36-7	COC(=O)c1ccc(I)cc1S(=O)(=NC(=O)Nc2nc(C)nc(OC)n2)O	86.9	EC50	0	Training set
165252-70-0	CN=C(NCC1CCOC1)N[N+](=O)[O-]	110.6	EC50	0	Training set
104040-78-0	COc1cc(OC)nc(NC(=O)NS(=O)(=O)c2ncccc2C(F)(F)F)n1	106	EC50	0	Training set
738-70-5	COc1cc(Cc2cnc(N)nc2N)cc(OC)c1OC	167.4	EC50	0	Training set
1111-67-7	SC#N	0.02	EC50	1	Training set
55290-64-7	CC1=C(C)S(=O)(=O)CCS1(=O)=O	6.6	EC50	1	Training set
133-07-3	ClC(Cl)(Cl)SN1C(=O)c2ccccc2C1=O	0.02	EC50	1	Training set
138-93-2	SC(=S)NC#N	8.3	EC50	1	Training set
4559-79-9	CN(C)C\C=C\CN(C)C	35.5	EC50	0	Training set
33089-61-1	CN(C=Nc1ccc(C)cc1C)C=Nc2ccc(C)cc2C	0.035	EC50	1	Training set
83588-43-6	CC1=CC(=O)C(=NN1c2ccc(Cl)cc2)C(=O)O	188	EC50	0	Training set
89-86-1	OC(=O)c1ccc(O)cc1O	120	EC50	0	Training set
79-00-5	ClCC(Cl)Cl	81	EC50	0	Training set
17321-77-6	CN(C)CCCN1c2ccccc2CCc3ccc(Cl)cc13	2.74	EC50	1	Training set
57837-19-1	COCC(=O)N(C(C)C(=O)OC)c1c(C)cccc1C	12.5	EC50	0	Training set
81052-29-1	CCN1C(=CC(=O)C(=C1c2ccc(Cl)cc2)C(=O)O)C	1150	EC50	0	Training set
107-06-2	ClCCCl	324	EC50	0	Training set
50723-80-3	CC(C)N1C(=O)c2ccccc2NS1(=O)=O	125	EC50	0	Training set
317815-83-1	COC(=O)c1csc(C)c1S(=O)(=O)NC(=O)N2N=C(OC)N(C)C2=O	98.6	EC50	0	Training set
66215-27-8	Nc1nc(N)nc(NC2CC2)n1	5.08	EC50	1	Training set
29761-21-5	CC(C)CCCCCCCOP(=O)(Oc1ccccc1)Oc2ccccc2	0.48	EC50	1	Training set
62732-91-6	CCOCCOCCOC(=O)Nc1nc2ccccc2[nH]1	2700	EC50	0	Training set
66330-88-9	OC(=O)[C@@H]1[C@H]2O[C@H](C=C2)[C@@H]1C(=O)O	0.32	EC50	1	Training set
2008-41-5	CCSC(=O)N(CC(C)C)CC(C)C	11.9	EC50	0	Training set
623-05-2	OCc1ccc(O)cc1	29.8	EC50	0	Training set
118-93-4	CC(=O)c1ccccc1O	56.5	EC50	0	Training set
2312-35-8	CC(C)(C)c1ccc(OC2CCCCC2OS(=O)OCC#C)cc1	0.091	EC50	1	Training set
1134-23-2	CCSC(=O)N(CC)C1CCCCC1	24	EC50	0	Training set
94-74-6	Cc1cc(Cl)ccc1OCC(=O)O	180	EC50	0	Training set
1596-84-5	CN(C)NC(=O)CCC(=O)O	101	EC50	0	Training set
16672-87-0	OP(=O)(O)CCCl	31.7	EC50	0	Training set
2691-41-0	[O-][N+](=O)N1CN(CN(CN(C1)[N+](=O)[O-])[N+](=O)[O-])[N+](=O)[O-]	32	EC50	0	Training set
87392-12-9	CCc1cccc(C)c1N([C@@H](C)COC)C(=O)CCl	26	EC50	0	Training set
100-97-0	C1N2CN3CN(CN1C3)C2	36000	EC50	0	Training set
2528-16-7	OC(=O)c1ccccc1C(=O)OCc2ccccc2	160	EC50	0	Training set
120116-88-3	CN(C)S(=O)(=O)n1c(nc(Cl)c1c2ccc(C)cc2)C#N	0.158	EC50	1	Training set
99-10-5	OC(=O)c1cc(O)cc(O)c1	616	EC50	0	Training set
24307-26-4	C[N+]1(C)CCCCC1	106	EC50	0	Training set
59-87-0	NC(=O)N\N=C\c1oc(cc1)[N+](=O)[O-]	28.67	EC50	0	Training set
94125-34-5	COc1nc(C)nc(NC(=O)NS(=O)(=O)c2ccccc2CCC(F)(F)F)n1	120	EC50	0	Training set
113158-40-0	CC(Oc1ccc(Oc2oc3cc(Cl)ccc3n2)cc1)C(=O)O	32	EC50	0	Training set
154-21-2	CCC[C@@H]1C[C@H](N(C)C1)C(=O)N[C@H]([C@@H](C)O)[C@H]2O[C@H](SC)[C@H](O)[C@@H](O)[C@H]2O	500	EC50	0	Training set
78246-49-8	Fc1ccc(cc1)[C@@H]2CCNC[C@H]2COc3ccc4OCOc4c3	6.24	EC50	1	Training set
78-70-6	CC(=CCCC(C)(O)C=C)C	36.7	EC50	0	Training set
1912-24-9	CCNc1nc(Cl)nc(NC(C)C)n1	115	EC50	0	Training set
31430-15-6	COC(=O)Nc1nc2cc(ccc2[nH]1)C(=O)c3ccc(F)cc3	0.0701	EC50	1	Training set
19329-89-6	CC(C)CCOC(=O)C(C)O	193	EC50	0	Training set
79617-96-2	CN[C@H]1CC[C@@H](c2ccc(Cl)c(Cl)c2)c3ccccc13	0.56	EC50	1	Training set
79-94-7	CC(C)(c1cc(Br)c(O)c(Br)c1)c2cc(Br)c(O)c(Br)c2	7.9	EC50	1	Training set
123-31-9	Oc1ccc(O)cc1	0.13	EC50	1	Training set
163520-33-0	CCOC(=O)C1=NOC(C1)(c2ccccc2)c3ccccc3	0.51	EC50	1	Training set
124-11-8	CCCCCCCC=C	3.2	EC50	1	Training set
86-74-8	c1ccc2c(c1)[nH]c3ccccc23	3.35	EC50	1	Training set
67485-29-4	CC1(C)CNC(=NC1)NN=C(\C=C\c2ccc(cc2)C(F)(F)F)\C=C\c3ccc(cc3)C(F)(F)F	0.13	EC50	1	Training set
104-42-7	CCCCCCCCCCCCc1ccc(N)cc1	0.00071	EC50	1	Training set
307-55-1	OC(=O)C(F)(F)C(F)(F)C(F)(F)C(F)(F)C(F)(F)C(F)(F)C(F)(F)C(F)(F)C(F)(F)C(F)(F)C(F)(F)F	79.2186	EC50	0	Training set
95-93-2	Cc1cc(C)c(C)cc1C	0.469763	EC50	1	Training set
300-76-5	COP(=O)(OC)OC(Br)C(Cl)(Cl)Br	0.0029	EC50	1	Training set
100-01-6	Nc1ccc(cc1)[N+](=O)[O-]	17	EC50	0	Training set
2426-08-6	CCCCOCC1CO1	3.9	EC50	1	Training set
116714-46-6	FC(OC(F)(F)F)C(F)(F)Oc1ccc(NC(=O)NC(=O)c2c(F)cccc2F)cc1Cl	0.00431	EC50	1	Training set
2439-35-2	CN(C)CCOC(=O)C=C	711	EC50	0	Training set
154-21-2	CS[C@H]1O[C@H]([C@H](NC(=O)[C@@H]2C[C@@H](CCCO)CN2C)[C@@H](C)O)[C@H](O)[C@H](O)[C@H]1O	500	EC50	0	Training set
88-99-3	OC(=O)c1ccccc1C(=O)O	640	EC50	0	Training set
77-99-6	CCC(CO)(CO)CO	13000	EC50	0	Training set
57-55-6	CC(O)CO	110	EC50	0	Training set
67-64-1	CC(=O)C	13500	EC50	0	Training set
100-02-7	Oc1ccc(cc1)[N+](=O)[O-]	4.7	EC50	1	Training set
1214-39-7	C(Nc1[nH]cnc2ncnc12)c3ccccc3	20.5	EC50	0	Training set
5902-51-2	CC1=C(Cl)C(=O)N(C(=O)N1)C(C)(C)C	65	EC50	0	Training set
112143-82-5	CCOC(=O)CSc1nc(nn1C(=O)N(C)C)C(C)(C)C	0.014	EC50	1	Training set
8000-29-1	CC(CCC=C(C)C)CC=O	26.4	EC50	0	Training set
374726-62-2	COc1cc(CCNC(=O)[C@H](OCC#C)c2ccc(Cl)cc2)ccc1OCC#C	7.1	EC50	1	Training set
865363-39-9	CCCCC(CC)COC(=O)[C@@H](C)Oc1ccc(Cl)cc1Cl	1.5	EC50	1	Training set
98-17-9	Oc1cccc(c1)C(F)(F)F	11	EC50	0	Training set
73231-34-2	CS(=O)(=O)c1ccc(cc1)[C@@H](O)[C@@H](CF)NC(=O)C(Cl)Cl	337	EC50	0	Training set
181274-15-7	CCCOC1=NN(C(=O)N=S(=O)(O)c2ccccc2C(=O)OC)C(=O)N1C	107	EC50	0	Training set
63-25-2	CNC(=O)Oc1cccc2ccccc12	0.0126769	EC50	1	Training set
603-83-8	Cc1c(N)cccc1[N+](=O)[O-]	13.2	EC50	0	Training set
76674-21-0	OC(Cn1cncn1)(c2ccc(F)cc2)c3ccccc3F	7.05	EC50	1	Training set
86-50-0	COP(=S)(OC)SCN1N=Nc2ccccc2C1=O	0.0044	EC50	1	Training set
1918-16-7	CC(C)N(C(=O)CCl)c1ccccc1	6.9	EC50	1	Training set
96-18-4	ClCC(Cl)CCl	33.8	EC50	0	Training set
104206-82-8	CS(=O)(=O)c1ccc(C(=O)C2C(=O)CCCC2=O)c(c1)[N+](=O)[O-]	840	EC50	0	Training set
133-32-4	OC(=O)CCCc1c[nH]c2ccccc12	57	EC50	0	Training set
97-64-3	CCOC(=O)C(C)O	560	EC50	0	Training set
21564-17-0	N#CSCSc1nc2ccccc2s1	0.023	EC50	1	Training set
101-05-3	Clc1ccccc1Nc2nc(Cl)nc(Cl)n2	0.949	EC50	1	Training set
314-40-9	CCC(C)N1C(=O)NC(=C(Br)C1=O)C	121	EC50	0	Training set
113-48-4	CCCCC(CC)CN1C(=O)C2C3CC(C=C3)C2C1=O	2.3	EC50	1	Training set
61-82-5	Nc1nc[nH]n1	6.9	EC50	1	Training set
75-31-0	CC(C)N	91.6	EC50	0	Training set
13863-41-7	ClBr	0.71	EC50	1	Training set
618-85-9	Cc1cc(cc(c1)[N+](=O)[O-])[N+](=O)[O-]	45.1	EC50	0	Training set
28159-98-0	CSc1nc(NC2CC2)nc(NC(C)(C)C)n1	5.3	EC50	1	Training set
122548-33-8	COc1cc(OC)nc(NC(=O)NS(=O)(=O)c2c(Cl)nc3ccccn23)n1	32	EC50	0	Training set
335-76-2	OC(=O)C(F)(F)C(F)(F)C(F)(F)C(F)(F)C(F)(F)C(F)(F)C(F)(F)C(F)(F)C(F)(F)F	163.478	EC50	0	Training set
57-92-1	CN[C@H]1[C@H](O)[C@@H](O)[C@H](CO)O[C@H]1O[C@H]2[C@H](O[C@H]3[C@H](O)[C@@H](O)[C@H](N=C(N)N)[C@@H](O)[C@@H]3N=C(N)N)O[C@@H](C)[C@]2(O)C=O	650	EC50	0	Training set
206-44-0	c1ccc2c(c1)c3cccc4cccc2c34	0.00398434	EC50	1	Training set
6753-47-5	CC(O)CN(CC(C)O)CC(C)O	226	EC50	0	Training set
15307-79-6	OC(=O)Cc1ccccc1Nc2c(Cl)cccc2Cl	22.43	EC50	0	Training set
60-51-5	CNC(=O)CSP(=S)(OC)OC	0.56	EC50	1	Training set
12789-03-6	ClC1CC2C(C1Cl)C3(Cl)C(=C(Cl)C2(Cl)C3(Cl)Cl)Cl	0.097	EC50	1	Training set
72490-01-8	CCOC(=O)NCCOc1ccc(Oc2ccccc2)cc1	0.4	EC50	1	Training set
35554-44-0	Clc1ccc(C(Cn2ccnc2)OCC=C)c(Cl)c1	3.54	EC50	1	Training set
88-74-4	Nc1ccccc1[N+](=O)[O-]	4.89	EC50	1	Training set
75-09-2	ClCCl	135.807	EC50	0	Training set
57-62-5	CN(C)[C@H]1[C@@H]2C[C@H]3C(=C(O)[C@]2(O)C(=C(C(=O)N)C1=O)O)C(=O)c4c(O)ccc(Cl)c4[C@@]3(C)O	400	EC50	0	Training set
1646-88-4	CNC(=O)O\N=C\C(C)(C)S(=O)(=O)C	0.28	EC50	1	Training set
131-70-4	CCCCOC(=O)c1ccccc1C(=O)O	320	EC50	0	Training set
110-58-7	CCCCCN	56	EC50	0	Training set
51481-61-9	CN=C(NCCSCc1[nH]cnc1C)NC#N	379.7	EC50	0	Training set
55-38-9	COP(=S)(OC)Oc1ccc(SC)c(C)c1	0.05	EC50	1	Training set
57960-19-7	CCCCCCCCCCCCC1=C(OC(=O)C)C(=O)c2ccccc2C1=O	0.0027	EC50	1	Training set
3567-25-7	OS(=O)(=O)c1cc(Cl)ccc1Oc2ccc(Cl)cc2NC(=O)Nc3ccc(Cl)c(Cl)c3	9.46	EC50	1	Training set
4080-31-3	Cl\C=C\C[N+]12CN3CN(CN(C3)C1)C2	27	EC50	0	Training set
92-87-5	Nc1ccc(cc1)c2ccc(N)cc2	0.6	EC50	1	Training set
129630-19-9	CCOC(=O)COc1cc(c(F)cc1Cl)c2nn(C)c(OC(F)F)c2Cl	0.76	EC50	1	Training set
94361-06-5	CC(C1CC1)C(O)(Cn2cncn2)c3ccc(Cl)cc3	26	EC50	0	Training set
1910-42-5	C[n+]1ccc(cc1)c2cc[n+](C)cc2	1.25	EC50	1	Training set
6317-18-6	N#CSCSC#N	0.039	EC50	1	Training set
125590-73-0	CCCCC(CC)COC1OC(CO)C(O)C(O)C1O	102	EC50	0	Training set
29232-93-7	CCN(CC)c1nc(C)cc(OP(=S)(OC)OC)n1	0.00011	EC50	1	Training set
123-54-6	CC(=O)CC(=O)C	75	EC50	0	Training set
3337-71-1	COC(=O)NS(=O)(=O)c1ccc(N)cc1	27	EC50	0	Training set
26787-78-0	CC1(C)S[C@@H]2[C@H](NC(=O)[C@H](N)c3ccc(O)cc3)C(=O)N2[C@H]1C(=O)O	1000	EC50	0	Training set
56425-91-3	CC(C)C(O)(c1ccc(OC(F)(F)F)cc1)c2cncnc2	10.3	EC50	0	Training set
7664-38-2	OP(=O)(O)O	105	EC50	0	Training set
141112-29-0	CS(=O)(=O)c1cc(ccc1C(=O)c2cnoc2C3CC3)C(F)(F)F	1.5	EC50	1	Training set
112-12-9	CCCCCCCCCC(=O)C	0.54	EC50	1	Training set
422556-08-9	COc1cc(OC)n2nc(NS(=O)(=O)c3c(OC)nccc3C(F)(F)F)nc2n1	100	EC50	0	Training set
91-53-2	CCOc1ccc2NC(C)(C)C=C(C)c2c1	2	EC50	1	Training set
82-45-1	Nc1cccc2C(=O)c3ccccc3C(=O)c12	82.3	EC50	0	Training set
83-32-9	C1Cc2cccc3cccc1c23	3.45	EC50	1	Training set
122931-48-0	CCS(=O)(=O)c1cccnc1S(=O)(=O)NC(=O)Nc2nc(OC)cc(OC)n2	360	EC50	0	Training set
1420-04-8	Oc1ccc(Cl)cc1C(=O)Nc2ccc(cc2Cl)[N+](=O)[O-]	0.32	EC50	1	Training set
26760-64-5	CCC(=C)C	30	EC50	0	Training set
2439-00-1	OC(=O)Cc1c(Cl)ccc(Cl)c1Cl	100	EC50	0	Training set
1076-46-6	Nc1cc(Cl)cc(C(=O)O)c1Cl	1000	EC50	0	Training set
64036-43-7	CSc1nc2ccccc2s1	10	EC50	1	Training set
99-65-0	[O-][N+](=O)c1cccc(c1)[N+](=O)[O-]	53	EC50	0	Training set
6393-42-6	Cc1cc(c(N)c(c1)[N+](=O)[O-])[N+](=O)[O-]	13.1	EC50	0	Training set
72-17-3	CC(O)C(=O)O	2050	EC50	0	Training set
75-65-0	CC(C)(C)O	5504	EC50	0	Training set
88-89-1	Oc1c(cc(cc1[N+](=O)[O-])[N+](=O)[O-])[N+](=O)[O-]	90	EC50	0	Training set
51200-87-4	CC1(C)COCN1	45	EC50	0	Training set
2244-21-5	ClN1C(=O)NC(=O)N(Cl)C1=O	0.66	EC50	1	Training set
97886-45-8	CSC(=O)c1c(CC(C)C)c(C(=O)SC)c(nc1C(F)F)C(F)(F)F	5.2	EC50	1	Training set
71-43-2	c1ccccc1	9.23	EC50	1	Training set
57-68-1	Cc1cc(C)nc(NS(=O)(=O)c2ccc(N)cc2)n1	215.9	EC50	0	Training set
16484-77-8	C[C@@H](Oc1ccc(Cl)cc1C)C(=O)O	90.94	EC50	0	Training set
134-20-3	COC(=O)c1ccccc1N	18.2	EC50	0	Training set
1071-83-6	OC(=O)CNCP(=O)(O)O	2.95	EC50	1	Training set
77732-09-3	COCC(=O)N(N1CCOC1=O)c2c(C)cccc2C	530	EC50	0	Training set
15687-27-1	CC(C)Cc1ccc(cc1)C(C)C(=O)O	34.1	EC50	0	Training set
59729-32-7	CN(C)CCCC1(OCc2cc(ccc12)C#N)c3ccc(F)cc3	20	EC50	0	Training set
7631-90-5	OS(=O)O	140	EC50	0	Training set
123-07-9	CCc1ccc(O)cc1	5.7	EC50	1	Training set
30777-19-6	C1c2ccccc2c3cc4ccccc4cc13	0.104596	EC50	1	Training set
6062-26-6	Cc1cc(Cl)ccc1OCCCC(=O)O	50	EC50	0	Training set
189-55-9	c1ccc2c(c1)cc3ccc4cc5ccccc5c6ccc2c3c46	0.00520073	EC50	1	Training set
81334-34-1	CC(C)C1(C)N=C(NC1=O)c2ncccc2C(=O)O	100	EC50	0	Training set
86-87-3	OC(=O)Cc1cccc2ccccc12	180	EC50	0	Training set
132-66-1	OC(=O)c1ccccc1C(=O)Nc2cccc3ccccc23	118.5	EC50	0	Training set
81741-28-8	CCCCCCCCCCCCC(CCCC)C([PH3+])(CCCC)CCCC	0.0252	EC50	1	Training set
2439-01-2	Cc1ccc2nc3SC(=O)Sc3nc2c1	0.12	EC50	1	Training set
1397-94-0	CCCCCC[C@@H]1[C@@H](OC(=O)CC(C)C)[C@H](C)OC(=O)[C@@H](NC(=O)c2cccc(NC=O)c2O)[C@@H](C)OC1=O	0.005	EC50	1	Training set
42588-37-4	CC(C)CCCC(C)C\C=C\C(=C\C(=O)OCC#C)\C	0.1	EC50	1	Training set
30388-01-3	C[C@H](O)CSS(=O)(=O)C	12	EC50	0	Training set
25167-83-3	Oc1cc(Cl)c(Cl)c(Cl)c1Cl	0.5	EC50	1	Training set
619-72-7	[O-][N+](=O)c1ccc(cc1)C#N	49.4	EC50	0	Training set
79-34-5	ClC(Cl)C(Cl)Cl	25	EC50	0	Training set
50-63-5	CCN(CC)CCCC(C)Nc1ccnc2cc(Cl)ccc12	9.38869	EC50	1	Training set
83-79-4	COc1cc2OC[C@H]3Oc4c5C[C@@H](Oc5ccc4C(=O)[C@H]3c2cc1OC)C(=C)C	0.008	EC50	1	Training set
1929-82-4	Clc1cccc(n1)C(Cl)(Cl)Cl	5.8	EC50	1	Training set
58-89-9	Clc1c(Cl)c(Cl)c(Cl)c(Cl)c1Cl	0.516	EC50	1	Training set
97553-90-7	CC(CN1COC(C)C1)OCOCOCO	98	EC50	0	Training set
78-11-5	[O-][N+](=O)OCC(CO[N+](=O)[O-])(CO[N+](=O)[O-])CO[N+](=O)[O-]	49	EC50	0	Training set
99-55-8	Cc1ccc(cc1N)[N+](=O)[O-]	22.5	EC50	0	Training set
122453-73-0	CCOCn1c(c2ccc(Cl)cc2)c(C#N)c(Br)c1C(F)(F)F	0.0078	EC50	1	Training set
34375-28-5	OCCNCO	25.2	EC50	0	Training set
1763-23-1	OS(=O)(=O)C(F)(F)C(F)(F)C(F)(F)C(F)(F)C(F)(F)C(F)(F)C(F)(F)C(F)(F)F	37.36	EC50	0	Training set
108-80-5	O=C1NC(=O)NC(=O)N1	1000	EC50	0	Training set
70161-44-3	OCNCC(=O)O	39	EC50	0	Training set
1405-41-0	CN[C@H](C)[C@@H]1CC[C@@H](N)[C@@H](O[C@@H]2[C@@H](N)C[C@@H](N)[C@H](O[C@H]3OC[C@](C)(O)[C@H](NC)[C@H]3O)[C@H]2O)O1	21.2	EC50	0	Training set
108-62-3	CC1OC(C)OC(C)OC(C)O1	77.66	EC50	0	Training set
83-30-7	OC(=O)c1c(O)cc(O)cc1O	1.7	EC50	1	Training set
119-12-0	CCOP(=S)(OCC)OC1=NN(C(=O)C=C1)c2ccccc2	0.00092	EC50	1	Training set
72963-72-5	CC(=CC1C(C(=O)OCN2C(=O)CN(CC#C)C2=O)C1(C)C)C	0.051	EC50	1	Training set
123-08-0	Oc1ccc(C=O)cc1	49.3	EC50	0	Training set
82097-50-5	COc1nc(C)nc(NC(=O)NS(=O)(=O)c2ccccc2OCCCl)n1	100	EC50	0	Training set
80-06-8	CC(O)(c1ccc(Cl)cc1)c2ccc(Cl)cc2	0.27	EC50	1	Training set
121-69-7	CN(C)c1ccccc1	2.3	EC50	1	Training set
99129-21-2	CCS[C@H](C)C[C@@H]1CC(=C(\C(=N\OC\C=C/Cl)\CC)C(=O)C1)O	20.2	EC50	0	Training set
82-66-6	O=C(C(c1ccccc1)c2ccccc2)C3C(=O)c4ccccc4C3=O	1.8	EC50	1	Training set
118-41-2	COc1cc(cc(OC)c1OC)C(=O)O	5200	EC50	0	Training set
723-46-6	Cc1onc(NS(=O)(=O)c2ccc(N)cc2)c1	205.2	EC50	0	Training set
37764-25-3	ClC(Cl)C(=O)N(CC=C)CC=C	141	EC50	0	Training set
33629-47-9	CCC(C)Nc1c(cc(cc1[N+](=O)[O-])C(C)(C)C)[N+](=O)[O-]	1	EC50	1	Training set
109-69-3	CCCCCl	3020	EC50	0	Training set
58-89-9	ClC1C(Cl)C(Cl)C(Cl)C(Cl)C1Cl	0.516	EC50	1	Training set
128-03-0	CN(C)C(=S)S	0.34	EC50	1	Training set
58842-20-9	[O-][N+](=O)\C=C\1/NCCCS1	33.85	EC50	0	Training set
120-94-5	CN1CCCC1	5000	EC50	0	Training set
135410-20-7	CN(Cc1ccc(Cl)nc1)C(=NC#N)C	50	EC50	0	Training set
56073-10-0	OC1=C(C2CC(Cc3ccccc23)c4ccc(cc4)c5ccc(Br)cc5)C(=O)Oc6ccccc16	0.98	EC50	1	Training set
82657-04-3	Cc1c(COC(=O)C2C(\C=C(/Cl)\C(F)(F)F)C2(C)C)cccc1c3ccccc3	0.0016	EC50	1	Training set
81335-37-7	CC(C)C1(C)N=C(NC1=O)c2nc3ccccc3cc2C(=O)O	280	EC50	0	Training set
4437-85-8	CCC1COC(=O)O1	905.4	EC50	0	Training set
181274-17-9	COC1=NN(C(=O)NS(=O)(=O)c2ccccc2OC(F)(F)F)C(=O)N1C	109	EC50	0	Training set
8001-35-2	ClCC1(CCl)C(=C)C2(Cl)C(Cl)C(Cl)C1(Cl)C2(Cl)Cl	0.01	EC50	1	Training set
50-29-3	Clc1ccc(cc1)C(c2ccc(Cl)cc2)C(Cl)(Cl)Cl	0.00108	EC50	1	Training set
91-20-3	c1ccc2ccccc2c1	4.72951	EC50	1	Training set
25954-13-6	CCOP(=O)(O)C(=O)N	100	EC50	0	Training set
131807-57-3	CC1(OC(=O)N(Nc2ccccc2)C1=O)c3ccc(Oc4ccccc4)cc3	0.0118	EC50	1	Training set
138261-41-3	[O-][N+](=O)NC1=NCCN1Cc2ccc(Cl)nc2	6.029	EC50	1	Training set
616-72-8	Cc1cc(C)c(cc1[N+](=O)[O-])[N+](=O)[O-]	24.3	EC50	0	Training set
874967-67-6	Cn1cc(C(=O)Nc2ccccc2C3CC3C4CC4)c(n1)C(F)F	5.96	EC50	1	Training set
119-06-2	CCCCCCCCCCCCCOC(=O)c1ccccc1C(=O)OCCCCCCCCCCCCC	0.05	EC50	1	Training set
1194-65-6	Clc1cccc(Cl)c1C#N	10	EC50	1	Training set
104-94-9	COc1ccc(N)cc1	0.18	EC50	1	Training set
121552-61-2	Cc1cc(nc(Nc2ccccc2)n1)C3CC3	0.032	EC50	1	Training set
84087-01-4	OC(=O)c1c(Cl)ccc2cc(Cl)cnc12	29.8	EC50	0	Training set
107-10-8	CCCN	100	EC50	0	Training set
50-28-2	C[C@]12CC[C@H]3[C@@H](CCc4cc(O)ccc34)[C@@H]1CC[C@@H]2O	2.87	EC50	1	Training set
105-60-2	O=C1CCCCCN1	2430	EC50	0	Training set
79241-46-6	CCCCOC(=O)[C@@H](C)Oc1ccc(Oc2ccc(cn2)C(F)(F)F)cc1	412.4	EC50	0	Training set
10222-01-2	NC(=O)C(Br)(Br)C#N	0.86	EC50	1	Training set
372137-35-4	CC(C)N(C)S(=O)(=O)NC(=O)c1cc(N2C(=O)C=C(N(C)C2=O)C(F)(F)F)c(F)cc1Cl	98.2	EC50	0	Training set
111991-09-4	COc1cc(OC)nc(NC(=O)NS(=O)(=O)c2ncccc2C(=O)N(C)C)n1	1000	EC50	0	Training set
118-44-5	CCNc1cccc2ccccc12	0.7	EC50	1	Training set
82697-71-0	CCC1=C(C(=O)O)C(=O)C=NN1c2ccc(Cl)cc2	5400	EC50	0	Training set
78-92-2	CCC(C)O	4227	EC50	0	Training set
69-72-7	OC(=O)c1ccccc1O	870	EC50	0	Training set
5395-50-6	OCN1C2C(N(CO)C(=O)N2CO)N(CO)C1=O	100	EC50	0	Training set
646-06-0	C1COCO1	6950	EC50	0	Training set
36734-19-7	CC(C)NC(=O)N1CC(=O)N(C1=O)c2cc(Cl)cc(Cl)c2	0.24	EC50	1	Training set
104-55-2	O=C\C=C\c1ccccc1	7.05	EC50	1	Training set
1886-81-3	CCCCCCCCCCCCOS(=O)(=O)c1ccccc1	23.4	EC50	0	Training set
71-36-3	CCCCO	1983	EC50	0	Training set
96-13-9	OCC(Br)CBr	338	EC50	0	Training set
135158-54-2	CSC(=O)c1cccc2nnsc12	2.9	EC50	1	Training set
15627-09-5	[O-][N-][N+](=O)C1CCCCC1	1.1	EC50	1	Training set
38260-54-7	CCOc1cc(OP(=S)(OC)OC)nc(CC)n1	0.0022	EC50	1	Training set
2517-43-3	COC(C)CCO	1000	EC50	0	Training set
82558-50-7	CCC(C)(CC)c1cc(NC(=O)c2c(OC)cccc2OC)on1	1.3	EC50	1	Training set
330-55-2	CON(C)C(=O)Nc1ccc(Cl)c(Cl)c1	0.12	EC50	1	Training set
86-73-7	C1c2ccccc2c3ccccc13	0.43	EC50	1	Training set
79-57-2	CN(C)[C@H]1[C@@H]2[C@@H](O)[C@H]3C(C(=O)c4c(O)cccc4[C@@]3(C)O)C(=O)[C@]2(O)C(=C(C(=O)N)C1=O)O	669	EC50	0	Training set
59669-26-0	CS\C(=N\OC(=O)N(C)SN(C)C(=O)O\N=C(/C)\SC)\C	0.027	EC50	1	Training set
99300-78-4	COc1ccc(cc1)C(CN(C)C)C2(O)CCCCC2	141.28	EC50	0	Training set
109-73-9	CCCCN	100	EC50	0	Training set
67-63-0	CC(C)O	10100	EC50	0	Training set
3739-38-6	OC(=O)c1cccc(Oc2ccccc2)c1	0.05	EC50	1	Training set
102-81-8	CCCCN(CCO)CCCC	73.7	EC50	0	Training set
2869-34-3	CCCCCCCCCCCCCN	0.015	EC50	1	Training set
42835-25-6	CC1CCc2cc(F)cc3C(=O)C(=CN1c23)C(=O)O	59	EC50	0	Training set
288-88-0	c1nc[nH]n1	98.1	EC50	0	Training set
33820-53-0	CCCN(CCC)c1c(cc(cc1[N+](=O)[O-])C(C)C)[N+](=O)[O-]	0.03	EC50	1	Training set
71-55-6	CC(Cl)(Cl)Cl	11.2	EC50	0	Training set
56-95-1	Clc1ccc(NC(=N)NC(=N)NCCCCCCNC(=N)NC(=N)Nc2ccc(Cl)cc2)cc1	0.063	EC50	1	Training set
657-24-9	CN(C)C(=N)N=C(N)N	64	EC50	0	Training set
3244-90-4	CCCOP(=S)(OCCC)OP(=S)(OCCC)OCCC	0.0024	EC50	1	Training set
153719-23-4	CN1COCN(Cc2cnc(Cl)s2)/C/1=N/[N+](=O)[O-]	106	EC50	0	Training set
123-30-8	Nc1ccc(O)cc1	0.24	EC50	1	Training set
50-78-2	CC(=O)Oc1ccccc1C(=O)O	88.1	EC50	0	Training set
52-51-7	OCC(Br)(CO)[N+](=O)[O-]	1.6	EC50	1	Training set
111988-49-9	Clc1ccc(CN2CCSC2=NC#N)cn1	22.52	EC50	0	Training set
77-06-5	CC12[C@@H](O)C=C[C@@]3(OC1=O)[C@@H]4CC[C@]5(O)C[C@]4(CC5=C)[C@H]([C@H]23)C(=O)O	143	EC50	0	Training set
93-07-2	COc1ccc(cc1OC)C(=O)O	1820	EC50	0	Training set
99-76-3	COC(=O)c1ccc(O)cc1	41.1	EC50	0	Training set
7212-44-4	CC(=CCC\C(=C\CCC(C)(O)C=C)\C)C	2.2	EC50	1	Training set
20018-09-1	Cc1ccc(cc1)S(=O)(=O)C(I)I	0.071	EC50	1	Training set
148-79-8	c1ccc2[nH]c(nc2c1)c3cscn3	0.31	EC50	1	Training set
1192-52-5	ClC1=C(Cl)C(=O)SS1	0.011	EC50	1	Training set
91125-43-8	CCCCCCCCC(=O)Oc1ccccc1S(=O)(=O)O	1000	EC50	0	Training set
179101-81-6	FC(F)(F)c1ccc(OCCCOc2c(Cl)cc(OCC=C(Cl)Cl)cc2Cl)nc1	0.0042	EC50	1	Training set
56296-78-7	CNCCC(Oc1ccc(cc1)C(F)(F)F)c2ccccc2	5.91	EC50	1	Training set
112226-61-6	CC(C)(C)N(NC(=O)c1ccc(Cl)cc1)C(=O)c2ccccc2	3.6	EC50	1	Training set
3689-24-5	CCOP(=S)(OCC)OP(=S)(OCC)OCC	0.0025	EC50	1	Training set
110-65-6	OCC#CCO	30.2	EC50	0	Training set
32289-58-0	CCCCCCN=C(N)N=C(N)N	0.18	EC50	1	Training set
122-66-7	N(Nc1ccccc1)c2ccccc2	2.18	EC50	1	Training set
2528-36-1	CCCCOP(=O)(OCCCC)Oc1ccccc1	0.36	EC50	1	Training set
175013-18-0	CON(C(=O)OC)c1ccccc1COc2ccn(n2)c3ccc(Cl)cc3	0.0157	EC50	1	Training set
7758-19-2	OCl=O	0.025	EC50	1	Training set
131860-33-8	CO\C=C(\C(=O)OC)/c1ccccc1Oc2cc(Oc3ccccc3C#N)ncn2	0.259	EC50	1	Training set
3218-02-8	NCC1CCCCC1	24.2	EC50	0	Training set
8003-34-7	COC(=O)C(=CC1C(C(=O)OC2CC(=O)C(=C2C)CC=CC=C)C1(C)C)C	0.0116	EC50	1	Training set
504-24-5	Nc1ccncc1	3.2	EC50	1	Training set
95737-68-1	CC(COc1ccc(Oc2ccccc2)cc1)Oc3ccccn3	0.4	EC50	1	Training set
85264-33-1	Cc1cc(C)n(CO)n1	31.7	EC50	0	Training set
87-61-6	Clc1cccc(Cl)c1Cl	1.45158	EC50	1	Training set
5234-68-4	CC1=C(SCCO1)C(=O)Nc2ccccc2	57	EC50	0	Training set
4719-04-4	OCCN1CN(CCO)CN(CCO)C1	26.1	EC50	0	Training set
86479-06-3	FC(F)C(F)(F)Oc1c(Cl)cc(NC(=O)NC(=O)c2c(F)cccc2F)cc1Cl	0.000111	EC50	1	Training set
994-05-8	CCC(C)(C)OC	100	EC50	0	Training set
91-65-6	CCN(CC)C1CCCCC1	5.76	EC50	1	Training set
18172-67-3	CC1(C)[C@H]2CCC(=C)[C@@H]1C2	1.25	EC50	1	Training set
15165-67-0	C[C@@H](Oc1ccc(Cl)cc1Cl)C(=O)O	100	EC50	0	Training set
60-00-4	OC(=O)CN(CCN(CC(=O)O)CC(=O)O)CC(=O)O	113	EC50	0	Training set
2597-03-7	CCOC(=O)C(SP(=S)(OC)OC)c1ccccc1	0.0019	EC50	1	Training set
81-61-8	Oc1ccc2C(=O)c3c(O)ccc(O)c3C(=O)c2c1O	0.186516	EC50	1	Training set
57-24-9	O=C1C[C@@H]2OCC=C3CN4CC[C@@]56[C@@H]4C[C@@H]3[C@@H]2[C@@H]5N1c7ccccc67	10	EC50	1	Training set
110488-70-5	COc1ccc(cc1OC)\C(=C/C(=O)N2CCOCC2)\c3ccc(Cl)cc3	10.6	EC50	0	Training set
23103-98-2	CN(C)C(=O)Oc1nc(nc(C)c1C)N(C)C	0.0065	EC50	1	Training set
1014-69-3	CNc1nc(NC(C)C)nc(SC)n1	26	EC50	0	Training set
645-08-9	COc1ccc(cc1O)C(=O)O	1130	EC50	0	Training set
145701-21-9	CCOc1nc(F)cc2nc(nn12)S(=O)(=O)Nc3c(Cl)cccc3Cl	72	EC50	0	Training set
104-51-8	CCCCc1ccccc1	0.45	EC50	1	Training set
828-00-2	CC1CC(OC(=O)C)OC(C)O1	24	EC50	0	Training set
355-80-6	OCC(F)(F)C(F)(F)C(F)(F)C(F)F	283.592	EC50	0	Training set
2058-46-0	CN(C)[C@H]1[C@@H]2[C@@H](O)[C@H]3C(=C(O)[C@]2(O)C(=C(C(=O)N)C1=O)O)C(=O)c4c(O)cccc4[C@@]3(C)O	250	EC50	0	Training set
124495-18-7	Fc1ccc(Oc2ccnc3cc(Cl)cc(Cl)c23)cc1	0.091	EC50	1	Training set
92-52-4	c1ccc(cc1)c2ccccc2	0.73	EC50	1	Training set
98-01-1	O=Cc1occc1	20.4	EC50	0	Training set
79-06-1	NC(=O)C=C	98	EC50	0	Training set
487-54-7	OC(=O)CNC(=O)c1ccccc1O	1800	EC50	0	Training set
118-96-7	Cc1c(cc(cc1[N+](=O)[O-])[N+](=O)[O-])[N+](=O)[O-]	15	EC50	0	Training set
5464-71-1	CCCCCCCCOC(=O)C(C)O	45	EC50	0	Training set
841-06-5	COCCCNc1nc(NC(C)C)nc(SC)n1	42	EC50	0	Training set
141-66-2	COP(=O)(OC)O\C(=C\C(=O)N(C)C)\C	0.0127	EC50	1	Training set
133-06-2	ClC(Cl)(Cl)SN1C(=O)C2CC=CCC2C1=O	7.1	EC50	1	Training set
110-15-6	OC(=O)CCC(=O)O	374.2	EC50	0	Training set
7747-35-5	CCC12COCN1COC2	42	EC50	0	Training set
882-09-7	CC(C)(Oc1ccc(Cl)cc1)C(=O)O	200	EC50	0	Training set
525-79-1	C(Nc1[nH]cnc2ncnc12)c3occc3	0.64	EC50	1	Training set
78-83-1	CC(C)CO	1111.82	EC50	0	Training set
576-24-9	Oc1cccc(Cl)c1Cl	3.1	EC50	1	Training set
62476-59-9	OC(=O)c1cc(Oc2ccc(cc2Cl)C(F)(F)F)ccc1[N+](=O)[O-]	28.1	EC50	0	Training set
57-14-7	CN(C)N	27.66	EC50	0	Training set
14698-29-4	CCN1C=C(C(=O)O)C(=O)c2cc3OCOc3cc12	4.6	EC50	1	Training set
24579-73-5	CCCOC(=O)NCCCN(C)C	106	EC50	0	Training set
112-05-0	CCCCCCCCC(=O)O	96	EC50	0	Training set
577-11-7	CCCCC(CC)COC(=O)CC(C(=O)OCC(CC)CCCC)S(=O)(=O)O	43	EC50	0	Training set
150114-71-9	Nc1cc(Cl)nc(C(=O)O)c1Cl	98.6	EC50	0	Training set
139-40-2	CC(C)Nc1nc(Cl)nc(NC(C)C)n1	5.32	EC50	1	Training set
120928-09-8	CC(C)(C)c1ccc(CCOc2ncnc3ccccc23)cc1	0.0056	EC50	1	Training set
96182-53-5	CCOP(=S)(OC(C)C)Oc1cnc(nc1)C(C)(C)C	7.8e-05	EC50	1	Training set
126833-17-8	CC1(CCCCC1)C(=O)Nc2ccc(O)c(Cl)c2Cl	18.8	EC50	0	Training set
110-83-8	C1CCC=CC1	5.3	EC50	1	Training set
63333-35-7	CN(c1c(Br)cc(Br)cc1Br)c2c(cc(cc2C(F)(F)F)[N+](=O)[O-])[N+](=O)[O-]	0.00198	EC50	1	Training set
2921-88-2	CCOP(=S)(OCC)Oc1nc(Cl)c(Cl)cc1Cl	3.24e-05	EC50	1	Training set
15972-60-8	CCc1cccc(CC)c1N(COC)C(=O)CCl	7.7	EC50	1	Training set
26159-34-2	COc1ccc2cc(ccc2c1)[C@H](C)C(=O)O	166.3	EC50	0	Training set
141-82-2	OC(=O)CC(=O)O	275	EC50	0	Training set
5137-55-3	CCCCCCCC[N+](C)(CCCCCCCC)CCCCCCCC	0.0413	EC50	1	Training set
163269-30-5	O=S1CCON=C1c2cc3ccccc3s2	0.422	EC50	1	Training set
2593-15-9	CCOc1nc(ns1)C(Cl)(Cl)Cl	4.9	EC50	1	Training set
123312-89-0	CC1=NNC(=O)N(C1)\N=C\c2cccnc2	87	EC50	0	Training set
81335-77-5	CCc1cnc(C2=NC(=O)C(C)(N2)C(C)C)c(c1)C(=O)O	110	EC50	0	Training set
127-18-4	ClC(=C(Cl)Cl)Cl	8.5	EC50	1	Training set
76-06-2	[O-][N+](=O)C(Cl)(Cl)Cl	0.17	EC50	1	Training set
504-63-2	OCCCO	7417	EC50	0	Training set
121-82-4	[O-][N+](=O)N1CN(CN(C1)[N+](=O)[O-])[N+](=O)[O-]	100	EC50	0	Training set
15263-52-2	CN(C)C(CSC(=O)N)CSC(=O)N	2.8294	EC50	1	Training set
213464-77-8	COc1cc(OC)nc(NC(=O)NS(=O)(=O)Nc2ccccc2C(=O)N(C)C)n1	97.3	EC50	0	Training set
768-94-5	NC12CC3CC(CC(C3)C1)C2	22.1	EC50	0	Training set
298-07-7	CCCCC(CC)COP(=O)(O)OCC(CC)CCCC	83.7	EC50	0	Training set
120-36-5	CC(Oc1ccc(Cl)cc1Cl)C(=O)O	5.4	EC50	1	Training set
74222-97-2	COC(=O)c1ccccc1S(=O)(=O)NC(=O)Nc2nc(C)cc(C)n2	12.5	EC50	0	Training set
127-79-7	Cc1ccnc(NS(=O)(=O)c2ccc(N)cc2)n1	277	EC50	0	Training set
88671-89-0	CCCCC(Cn1cncn1)(C#N)c2ccc(Cl)cc2	11	EC50	0	Training set
43210-67-9	COC(=O)Nc1nc2cc(Sc3ccccc3)ccc2[nH]1	0.0167	EC50	1	Training set
23950-58-5	CC(C)(NC(=O)c1cc(Cl)cc(Cl)c1)C#C	5.6	EC50	1	Training set
143-50-0	ClC1(Cl)C2(Cl)C3(Cl)C4(Cl)C(=O)C5(Cl)C(Cl)(C1(Cl)C35Cl)C24Cl	0.12	EC50	1	Training set
4920-77-8	Cc1cccc(O)c1[N+](=O)[O-]	18.8	EC50	0	Training set
2050-68-2	Clc1ccc(cc1)c2ccc(Cl)cc2	0.446196	EC50	1	Training set
158062-67-0	FC(F)(F)c1ccncc1C(=O)NCC#N	98.6	EC50	0	Training set
134-62-3	CCN(CC)C(=O)c1cccc(C)c1	75	EC50	0	Training set
149877-41-8	COc1ccc(cc1NNC(=O)OC(C)C)c2ccccc2	0.5	EC50	1	Training set
102-82-9	CCCCN(CCCC)CCCC	8	EC50	1	Training set
67233-85-6	COc1ccc(cc1O)[N+](=O)[O-]	26.1	EC50	0	Training set
283594-90-1	Cc1cc(C)c(C2=C(OC(=O)CC(C)(C)C)C3(CCCC3)OC2=O)c(C)c1	0.0923	EC50	1	Training set
375-22-4	OC(=O)C(F)(F)C(F)(F)C(F)(F)F	4280.76	EC50	0	Training set
85-00-7	C1C[n+]2ccccc2c3cccc[n+]13	0.77	EC50	1	Training set
1825-21-4	COc1c(Cl)c(Cl)c(Cl)c(Cl)c1Cl	0.0272	EC50	1	Training set
21725-46-2	CCNc1nc(Cl)nc(NC(C)(C)C#N)n1	35.5	EC50	0	Training set
10605-21-7	COC(=O)Nc1nc2ccccc2[nH]1	0.02	EC50	1	Training set
123-03-5	CCCCCCCCCCCCCCCC[n+]1ccccc1	0.00736	EC50	1	Training set
98967-40-9	Cc1ccn2nc(nc2n1)S(=O)(=O)Nc3c(F)cccc3F	254	EC50	0	Training set
5259-88-1	CC1=C(C(=O)Nc2ccccc2)S(=O)(=O)CCO1	69.1	EC50	0	Training set
22781-23-3	CNC(=O)Oc1cccc2OC(C)(C)Oc12	0.0292	EC50	1	Training set
589-16-2	CCc1ccc(N)cc1	2	EC50	1	Training set
13343-98-1	CCCCOCCOC	1000	EC50	0	Training set
7681-52-9	OCl	0.04	EC50	1	Training set
131341-86-1	FC1(F)Oc2cccc(c2O1)c3c[nH]cc3C#N	0.9	EC50	1	Training set
10004-44-1	CC1=CC(=O)NO1	30.8	EC50	0	Training set
1918-00-9	COc1c(Cl)ccc(Cl)c1C(=O)O	100	EC50	0	Training set
272451-65-7	Cc1cc(ccc1NC(=O)c2cccc(I)c2C(=O)NC(C)(C)CS(=O)(=O)C)C(F)(C(F)(F)F)C(F)(F)F	0.0548	EC50	1	Training set
51384-51-1	COCCc1ccc(OCC(O)CNC(C)C)cc1	100	EC50	0	Training set
115-32-2	OC(c1ccc(Cl)cc1)(c2ccc(Cl)cc2)C(Cl)(Cl)Cl	0.2	EC50	1	Training set
42399-41-7	COc1ccc(cc1)[C@@H]2Sc3ccccc3N(CCN(C)C)C(=O)[C@@H]2OC(=O)C	28	EC50	0	Training set
1085-98-9	CN(C)S(=O)(=O)N(SC(F)(Cl)Cl)c1ccccc1	1.05	EC50	1	Training set
542-75-6	ClC\C=C/Cl	0.09	EC50	1	Training set
72-14-0	Nc1ccc(cc1)S(=O)(=O)Nc2nccs2	23	EC50	0	Training set
214710-34-6	CCCCCCCCCCNCCCCCCCCCC	0.39	EC50	1	Training set
41859-67-0	CC(C)(Oc1ccc(CCNC(=O)c2ccc(Cl)cc2)cc1)C(=O)O	240.4	EC50	0	Training set
79622-59-6	[O-][N+](=O)c1cc(c(Cl)c(c1Nc2ncc(cc2Cl)C(F)(F)F)[N+](=O)[O-])C(F)(F)F	0.18	EC50	1	Training set
67564-91-4	CC(CN1C[C@@H](C)O[C@@H](C)C1)Cc2ccc(cc2)C(C)(C)C	2.38	EC50	1	Training set
99-96-7	OC(=O)c1ccc(O)cc1	1690	EC50	0	Training set
592-41-6	CCCCC=C	60	EC50	0	Training set

## Sheet: Other crustecean
CAS	Canonical_Smiles	toxicity(PPM)	endpoint	biclass
81103-11-9	CC[C@H]1OC(=O)[C@H](C)[C@@H](O[C@H]2C[C@@](C)(OC)[C@@H](O)[C@H](C)O2)[C@H](C)[C@@H](O[C@@H]3O[C@H](C)C[C@@H]([C@H]3O)N(C)C)[C@@](C)(C[C@@H](C)C(=O)[C@H](C)[C@@H](O)[C@]1(C)O)OC	8.16	EC50	1
93-04-9	COc1ccc2ccccc2c1	4.04	EC50	1
3073-66-3	CC1CCCC(C)(C)C1	1.1	EC50	1
140-57-8	CC(COc1ccc(cc1)C(C)(C)C)OS(=O)OCCCl	0.16	EC50	1
510-15-6	CCOC(=O)C(O)(c1ccc(Cl)cc1)c2ccc(Cl)cc2	0.87	EC50	1
72-43-5	COc1ccc(cc1)C(c2ccc(OC)cc2)C(Cl)(Cl)Cl	0.005	EC50	1
95-73-8	Cc1ccc(Cl)cc1Cl	1.01448	EC50	1
78587-05-0	C[C@H]1C(SC(=O)N1C(=O)NC2CCCCC2)c3ccc(Cl)cc3	0.742	EC50	1
98-82-8	CC(C)c1ccccc1	7.4	EC50	1
931-53-3	[C-]#[N+]C1CCCCC1	2.28	EC50	1
117-81-7	CCCCC(CC)COC(=O)c1ccccc1C(=O)OCC(CC)CCCC	0.133	EC50	1
2317-24-0	CCCCOCC(C)OC(=O)C(C)Oc1cc(Cl)c(Cl)cc1Cl	2.4	EC50	1
613-31-0	C1c2ccccc2Cc3ccccc13	0.56	EC50	1
24565-13-7	CCNc1nc(Nc2ccccc2)nc(Nc3ccc(\C=C\c4ccc(Nc5nc(NCC)nc(Nc6ccccc6)n5)cc4S(=O)(=O)O)c(c3)S(=O)(=O)O)n1	38.35	EC50	0
66357-35-5	CN\C(=C/[N+](=O)[O-])\NCCSCc1oc(CN(C)C)cc1	100	EC50	0
13532-18-8	COC(=O)CCSC	3.16	EC50	1
1330-20-7	Cc1cccc(C)c1	90	EC50	0
75-99-0	CC(Cl)(Cl)C(=O)O	16	EC50	0
68694-11-1	CCCOCC(=Nc1ccc(Cl)cc1C(F)(F)F)n2ccnc2	1.4	EC50	1
42200-33-9	CC(C)(C)NCC(O)COc1cccc2C[C@@H](O)[C@@H](O)Cc12	163.4	EC50	0
54-11-5	CN1CCC[C@H]1c2cccnc2	0.242	EC50	1
10548-10-4	CCOP(=S)(OCC)SCS(=O)C(C)(C)C	0.000489	EC50	1
1320-18-9	CCCCOCCCOC(=O)COc1ccc(Cl)cc1Cl	0.42	EC50	1
4316-42-1	CCCCn1ccnc1	6.573	EC50	1
447-53-0	C1Cc2ccccc2C=C1	4.3	EC50	1
9004-32-4	OCC(O)C(O)C(O)C(O)C=O	87.26	EC50	0
143-18-0	CCCCCCCC\C=C/CCCCCCCC(=O)O	0.57	EC50	1
544-77-4	CCCCCCCCCCCCCCCCI	0.219	EC50	1
68585-47-7	CCCCCCCCCCCCCOS(=O)(=O)O	1.37	EC50	1
529-69-1	Nc1nc(O)c2ncc(O)nc2n1	2.97	EC50	1
126-22-7	CCCC(=O)OC(C(Cl)(Cl)Cl)P(=O)(OC)OC	0.006	EC50	1
4170-30-3	C\C=C/C=O	2	EC50	1
34825-93-9	BrCC1CCCC=C1	12	EC50	0
493-09-4	C1COc2ccccc2O1	28.6	EC50	0
66728-50-5	COCCOC(C)(C)C	4780	EC50	0
85-34-7	Clc1ccc(Cl)c(CC=O)c1Cl	4.5	EC50	1
5407-87-4	Cc1cc(C)nc(N)c1	9.19	EC50	1
37677-17-1	BrCC1=CCCCC1	13.4	EC50	0
143-08-8	CCCCCCCCCO	360.635	EC50	0
609-19-8	Oc1cc(Cl)c(Cl)c(Cl)c1	0.4	EC50	1
122-42-9	CC(C)OC(=O)Nc1ccccc1	8.1	EC50	1
475-20-7	CC1(C)CCCC2(C)C3CCC(C13)C2=C	0.08	EC50	1
19078-35-4	CC1CCC23C(C)CCC(CC12)C3(C)C	0.035	EC50	1
473-55-2	CC1CCC2CC1C2(C)C	3.354	EC50	1
1646-87-3	CNC(=O)O\N=C\C(C)(C)S(=O)C	0.057	EC50	1
541-28-6	CC(C)CCI	2.658	EC50	1
50-44-2	Sc1[nH]cnc2ncnc12	54.5	EC50	0
294-62-2	C1CCCCCCCCCCC1	21	EC50	0
56070-16-7	CCOP(=S)(OCC)SCS(=O)(=O)C(C)(C)C	0.000324	EC50	1
32273-77-1	CC1CCC2CCCC12	6.961	EC50	1
581-42-0	Cc1ccc2cc(C)ccc2c1	0.193	EC50	1
76-44-8	ClC1C=CC2C1C3(Cl)C(=C(Cl)C2(Cl)C3(Cl)Cl)Cl	0.047	EC50	1
513-48-4	CCC(C)I	10.933	EC50	0
29587-92-6	C1CCCCC2OC2CCC1	37.9	EC50	0
82419-36-1	CC1COc2c(N3CCN(C)CC3)c(F)cc4C(=O)C(=CN1c24)C(=O)O	3.13	EC50	1
64628-44-0	FC(F)(F)Oc1ccc(NC(=O)NC(=O)c2ccccc2Cl)cc1	0.00021	EC50	1
112-52-7	CCCCCCCCCCCCCl	0.013	EC50	1
128-37-0	Cc1cc(c(O)c(c1)C(C)(C)C)C(C)(C)C	1.44	EC50	1
101-20-2	Clc1ccc(NC(=O)Nc2ccc(Cl)c(Cl)c2)cc1	0.0031	EC50	1
1319-77-3	Cc1ccc(O)cc1	7	EC50	1
29812-79-1	CCCCCCCCCCON	0.076	EC50	1
575-41-7	Cc1cc(C)c2ccccc2c1	1.28	EC50	1
68584-22-5	CCCCCCCCCC(CC)c1ccc(cc1)S(=O)(=O)O	5.65	EC50	1
9004-82-4	CCCCCCCCCCCCOCCOS(=O)(=O)O	3.12	EC50	1
558-17-8	CC(C)(C)I	0.41	EC50	1
6876-23-9	C[C@H]1CCCC[C@@H]1C	4.867	EC50	1
693-58-3	CCCCCCCCCBr	0.541	EC50	1
43121-43-3	CC(C)(C)C(=O)C(Oc1ccc(Cl)cc1)n2cncn2	20.5626	EC50	0
73851-70-4	CN\C(=C/[N+](=O)[O-])\NCCS(=O)Cc1oc(CN(C)C)cc1	7.85	EC50	1
27344-41-8	OS(=O)(=O)c1ccccc1\C=C/c2ccc(cc2)c3ccc(\C=C/c4ccccc4S(=O)(=O)O)cc3	40.33	EC50	0
275-51-4	c1ccc2cccc2cc1	1.6	EC50	1
584-79-2	CC(=CC1C(C(=O)OC2CC(=O)C(=C2C)CC=C)C1(C)C)C	0.021	EC50	1
78-87-5	CC(Cl)CCl	13.5583	EC50	0
13863-31-5	CN(CCO)c1nc(Nc2ccccc2)nc(Nc3ccc(\C=C\c4ccc(Nc5nc(Nc6ccccc6)nc(n5)N(C)CCO)cc4S(=O)(=O)O)c(c3)S(=O)(=O)O)n1	42.51	EC50	0
6452-73-9	CC(C)NCC(O)COc1ccccc1OCC=C	10.1	EC50	0
626-62-0	IC1CCCCC1	7.047	EC50	1
2702-72-9	CC(=O)Oc1ccc(Cl)cc1Cl	530	EC50	0
2040-96-2	CCCC1CCCC1	3.113	EC50	1
1008-80-6	CC1CC2CCCCC2CC1C	0.04	EC50	1
1137-12-8	CC1(C)CCC[C@@]2(C)[C@@H]3CC4C([C@H]13)C24C	0.065	EC50	1
68-04-2	OC(=O)CC(O)(CC(=O)O)C(=O)O	735.54	EC50	0
776-35-2	C1Cc2ccccc2c3ccccc13	0.42	EC50	1
2395-96-2	COc1c2ccccc2cc3ccccc13	0.395	EC50	1
634-66-2	Clc1ccc(Cl)c(Cl)c1Cl	0.129535	EC50	1
112-29-8	CCCCCCCCCCBr	0.284	EC50	1
2668-24-8	COc1cc(Cl)c(Cl)c(Cl)c1O	5.9	EC50	1
111-70-6	CCCCCCCO	6.15865	EC50	1
508-32-7	CC1(C)C2CC3C(C2)C13C	1.4	EC50	1
279-23-2	C1CC2CCC1C2	5.2	EC50	1
469-61-4	C[C@@H]1CC[C@H]2C(C)(C)C3C[C@@]12CC=C3C	0.044	EC50	1
60018-95-3	CC1(C)C(C=C(Cl)Cl)C1C(=O)OCc2cccc(Oc3ccccc3)c2	0.00012	EC50	1
26248-24-8	CCCCCCCCCCCCCc1ccc(cc1)S(=O)(=O)O	3.24	EC50	1
110-80-5	CCOCCO	1892.54	EC50	0
39765-80-5	ClC1C(Cl)C2C(C1Cl)C3(Cl)C(=C(Cl)C2(Cl)C3(Cl)Cl)Cl	0.0223	EC50	1
103-74-2	OCCc1ccccn1	13.82	EC50	0
613-12-7	Cc1ccc2cc3ccccc3cc2c1	0.096	EC50	1
309-00-2	ClC1=C(Cl)C2(Cl)C3C4CC(C=C4)C3C1(Cl)C2(Cl)Cl	0.032	EC50	1
89-82-7	C[C@@H]1CCC(=C(C)C)C(=O)C1	24.4	EC50	0
8065-48-3	CCOP(=O)(OCC)SCCSCC	0.014	EC50	1
108-40-7	Cc1cccc(S)c1	0.007	EC50	1
3296-50-2	C1CCC2CCCC2C1	3.701	EC50	1
111-42-2	OCCNCCO	72.92	EC50	0
20354-26-1	CN1C(=O)ON(C1=O)c2ccc(Cl)c(Cl)c2	1.3	EC50	1
55723-99-4	ClCC#CC1CCCCC1	1.572	EC50	1
34381-68-5	CCCC(=O)Nc1ccc(OCC(O)CNC(C)C)c(c1)C(=O)C	50.9	EC50	0
16090-02-1	OS(=O)(=O)c1cc(Nc2nc(Nc3ccccc3)nc(n2)N4CCOCC4)ccc1\C=C\c5ccc(Nc6nc(Nc7ccccc7)nc(n6)N8CCOCC8)cc5S(=O)(=O)O	6.85	EC50	1
616-45-5	O=C1CCCN1	13.21	EC50	0
2207-01-4	C[C@@H]1CCCC[C@@H]1C	3.235	EC50	1
7786-34-7	COC(=O)\C=C(/C)\OP(=O)(OC)OC	0.00016	EC50	1
56-23-5	ClC(Cl)(Cl)Cl	180.54	EC50	0
71-41-0	CCCCCO	52.8889	EC50	0
83121-18-0	Fc1cccc(F)c1C(=O)NC(=O)Nc2cc(Cl)c(F)c(Cl)c2F	0.00059	EC50	1
111-87-5	CCCCCCCCO	4.1673	EC50	1
77-73-6	C1C=CC2C3CC(C=C3)C12	4.2	EC50	1
106-43-4	Cc1ccc(Cl)cc1	1.64558	EC50	1

## Sheet: Global
CAS	Canonical_Smiles	toxicity(PPM)	endpoint	biclass	Training set/ Test set
119-32-4	Cc1ccc(N)cc1[N+](=O)[O-]	14.2	EC50	0	Test set
69377-81-7	Nc1c(Cl)c(F)nc(OCC(=O)O)c1Cl	100	EC50	0	Test set
138-22-7	CCCCOC(=O)C(C)O	423	EC50	0	Test set
40596-69-8	COC(C)(C)CCCC(C)C\C=C\C(=C\C(=O)OC(C)C)\C	0.89	EC50	1	Test set
2634-33-5	O=C1NSc2ccccc12	4.4	EC50	1	Test set
122-11-2	COc1cc(NS(=O)(=O)c2ccc(N)cc2)nc(OC)n1	270	EC50	0	Test set
131-11-3	COC(=O)c1ccccc1C(=O)OC	45.9	EC50	0	Test set
2855-13-2	CC1(C)CC(N)CC(C)(CN)C1	17.4	EC50	0	Test set
84-65-1	O=C1c2ccccc2C(=O)c3ccccc13	0.230836	EC50	1	Test set
79-11-8	OC(=O)CCl	77	EC50	0	Test set
82-68-8	[O-][N+](=O)c1c(Cl)c(Cl)c(Cl)c(Cl)c1Cl	0.77	EC50	1	Test set
71662-11-8	[O-][N+](=O)c1oc(\C=N\N2C[C@@H](CN3CCOCC3)OC2=O)cc1	101.78	EC50	0	Test set
74223-64-6	COC(=O)c1ccccc1S(=O)(=O)NC(=O)Nc2nc(C)nc(OC)n2	150	EC50	0	Test set
123-33-1	O=C1NNC(=O)C=C1	107.5	EC50	0	Test set
107-13-1	C=CC#N	7.38	EC50	1	Test set
121-75-5	CCOC(=O)CC(SP(=S)(OC)OC)C(=O)OCC	0.00353483	EC50	1	Test set
145-73-3	OC(=O)C1C2CCC(O2)C1C(=O)O	32.5	EC50	0	Test set
55335-06-3	OC(=O)COc1nc(Cl)c(Cl)cc1Cl	132.9	EC50	0	Test set
57-13-6	NC(=O)N	3910	EC50	0	Test set
51235-04-2	CN(C)C1=NC(=O)N(C2CCCCC2)C(=O)N1C	85	EC50	0	Test set
144-62-7	OC(=O)C(=O)O	136.9	EC50	0	Test set
19666-30-9	CC(C)Oc1cc(N2N=C(OC2=O)C(C)(C)C)c(Cl)cc1Cl	0.53	EC50	1	Test set
56634-95-8	CCCCCCC(=O)Oc1c(Br)cc(cc1Br)C#N	0.031	EC50	1	Test set
99-06-9	OC(=O)c1cccc(O)c1	1550	EC50	0	Test set
20543-04-8	CCCCCCCC(=O)O	0.012	EC50	1	Test set
114-07-8	CC[C@H]1OC(=O)[C@H](C)[C@@H](O[C@H]2C[C@@](C)(OC)[C@@H](O)[C@H](C)O2)[C@H](C)[C@@H](O[C@@H]3O[C@H](C)C[C@@H]([C@H]3O)N(C)C)[C@](C)(O)C[C@@H](C)C(=O)[C@H](C)[C@@H](O)[C@]1(C)O	207.83	EC50	0	Test set
3691-35-8	Clc1ccc(cc1)C(C(=O)C2C(=O)c3ccccc3C2=O)c4ccccc4	0.426	EC50	1	Test set
109-66-0	CCCCC	9.74009	EC50	1	Test set
92-48-8	Cc1ccc2OC(=O)C=Cc2c1	40.5228	EC50	0	Test set
7173-51-5	CCCCCCCCCC[N+](C)(C)CCCCCCCCCC	0.018	EC50	1	Test set
70630-17-0	COCC(=O)N([C@H](C)C(=O)OC)c1c(C)cccc1C	113	EC50	0	Test set
151-21-3	CCCCCCCCCCCCOS(=O)(=O)O	6	EC50	1	Test set
122836-35-5	CC1=NN(C(=O)N1C(F)F)c2cc(NS(=O)(=O)C)c(Cl)cc2Cl	60.4	EC50	0	Test set
61116-07-2	CC(=O)OO	0.73	EC50	1	Test set
530-57-4	COc1cc(cc(OC)c1O)C(=O)O	1330	EC50	0	Test set
490-79-9	OC(=O)c1cc(O)ccc1O	402.55	EC50	0	Test set
81-81-2	CC(=O)CC(C1=C(O)Oc2ccccc2C1=O)c3ccccc3	130	EC50	0	Test set
111-76-2	CCCCOCCO	1000	EC50	0	Test set
1330-78-5	Cc1ccc(OP(=O)(Oc2ccc(C)cc2)Oc3ccc(C)cc3)cc1	3.6	EC50	1	Test set
114369-43-6	Clc1ccc(CCC(Cn2cncn2)(C#N)c3ccccc3)cc1	2.3	EC50	1	Test set
9003-13-8	CCCCOCC(C)OCC(C)O	95	EC50	0	Test set
375-95-1	OC(=O)C(F)(F)C(F)(F)C(F)(F)C(F)(F)C(F)(F)C(F)(F)C(F)(F)C(F)(F)F	151.289	EC50	0	Test set
55512-33-9	CCCCCCCCSC(=O)Oc1cc(Cl)nnc1c2ccccc2	1.08	EC50	1	Test set
74-83-9	CBr	2.6	EC50	1	Test set
6283-86-9	CCCCC(CC)COC(=O)C(C)O	83	EC50	0	Test set
1263-89-4	NC[C@@H]1O[C@H](O[C@H]2[C@@H](O)C(O[C@@H]3[C@@H](O)[C@H](N)C[C@H](N)C3O[C@H]4O[C@H](CO)[C@@H](O)[C@H](O)[C@H]4N)O[C@@H]2CO)[C@H](N)[C@@H](O)[C@@H]1O	502.78	EC50	0	Test set
79277-27-3	COC(=O)c1sccc1S(=O)(=O)NC(=O)Nc2nc(C)nc(OC)n2	1000	EC50	0	Test set
96-45-7	S=C1NCCN1	26.9	EC50	0	Test set
10380-28-6	Oc1cccc2cccnc12	0.162	EC50	1	Test set
99-92-3	CC(=O)c1ccc(N)cc1	5	EC50	1	Test set
65-30-5	CN1CCCC1c2cccnc2	3.25	EC50	1	Test set
3759-92-0	[O-][N+](=O)c1oc(\C=N\N2CC(CN3CCOCC3)OC2=O)cc1	115.55	EC50	0	Test set
10543-57-4	CC(=O)N(CCN(C(=O)C)C(=O)C)C(=O)C	1000	EC50	0	Test set
302-17-0	OC(O)C(Cl)(Cl)Cl	500	EC50	0	Test set
3209-22-1	[O-][N+](=O)c1cccc(Cl)c1Cl	1.6	EC50	1	Test set
24544-04-5	CC(C)c1cccc(C(C)C)c1N	15	EC50	0	Test set
108-85-0	BrC1CCCCC1	2.3	EC50	1	Test set
950-37-8	COC1=NN(CSP(=S)(OC)OC)C(=O)S1	0.0119	EC50	1	Test set
1982-49-6	CC1CCCCC1NC(=O)Nc2ccccc2	13.7	EC50	0	Test set
2058-94-8	OC(=O)C(F)(F)C(F)(F)C(F)(F)C(F)(F)C(F)(F)C(F)(F)C(F)(F)C(F)(F)C(F)(F)C(F)(F)F	133.125	EC50	0	Test set
1404-04-2	NC[C@@H]1OC(O[C@H]2[C@@H](O)[C@H](O[C@@H]3[C@@H](O)[C@H](N)C[C@H](N)[C@H]3O[C@H]4O[C@H](CN)[C@@H](O)[C@H](O)[C@H]4N)O[C@@H]2CO)[C@H](N)[C@@H](O)[C@@H]1O	42.1	EC50	0	Test set
15299-99-7	CCN(CC)C(=O)C(C)Oc1cccc2ccccc12	14.3	EC50	0	Test set
53112-28-0	Cc1cc(C)nc(Nc2ccccc2)n1	3.04	EC50	1	Test set
56-72-4	CCOP(=S)(OCC)Oc1ccc2C(=C(Cl)C(=O)Oc2c1)C	0.000192	EC50	1	Test set
55-63-0	[O-][N+](=O)OCC(CO[N+](=O)[O-])O[N+](=O)[O-]	46	EC50	0	Test set
443-48-1	Cc1ncc([N+](=O)[O-])n1CCO	1000	EC50	0	Test set
500008-45-7	CNC(=O)c1cc(Cl)cc(C)c1NC(=O)c2cc(Br)nn2c3ncccc3Cl	0.0071	EC50	1	Test set
53780-36-2	CC(=O)Nc1cc(NS(=O)(=O)C(F)(F)F)c(C)cc1C	103	EC50	0	Test set
76703-62-3	CC1(C)[C@@H](\C=C(/Cl)\C(F)(F)F)[C@H]1C(=O)O[C@H](C#N)c2cccc(Oc3ccccc3)c2	0.0001	EC50	1	Test set
64902-72-3	COc1nc(C)nc(NC(=O)NS(=O)(=O)c2ccccc2Cl)n1	370	EC50	0	Test set
16245-79-7	CCCCCCCCc1ccc(N)cc1	0.02	EC50	1	Test set
3064-70-8	ClC(Cl)(Cl)S(=O)(=O)C(Cl)(Cl)Cl	0.173	EC50	1	Test set
79-01-6	ClC=C(Cl)Cl	7.75189	EC50	1	Test set
111-90-0	CCOCCOCCO	3996.37	EC50	0	Test set
65-85-0	OC(=O)c1ccccc1	100	EC50	0	Test set
39148-24-8	CCOP(=O)=O	304	EC50	0	Test set
65343-67-1	CCOC(=O)C(C)Oc1ccc(O)cc1	70	EC50	0	Test set
107-02-8	C=CC=O	0.093	EC50	1	Test set
69-53-4	CC1(C)S[C@@H]2[C@H](NC(=O)[C@H](N)c3ccccc3)C(=O)N2[C@H]1C(=O)O	1000	EC50	0	Test set
243973-20-8	CCc1cc(C)cc(CC)c1C2=C(OC(=O)C(C)(C)C)N3CCOCCN3C2=O	2.05	EC50	1	Test set
62924-70-3	CCN(Cc1c(F)cccc1Cl)c2c(cc(cc2[N+](=O)[O-])C(F)(F)F)[N+](=O)[O-]	0.0028	EC50	1	Test set
110-88-3	C1OCOCO1	15200	EC50	0	Test set
732-11-6	COP(=S)(OC)SCN1C(=O)c2ccccc2C1=O	0.024	EC50	1	Test set
115-20-8	OCC(Cl)(Cl)Cl	148.059	EC50	0	Test set
7779-27-3	CCN1CN(CC)CN(CC)C1	15.3	EC50	0	Test set
39300-45-3	C\C=C\C(=O)Oc1ccccc1[N+](=O)[O-]	0.0042	EC50	1	Test set
106-49-0	Cc1ccc(N)cc1	0.12	EC50	1	Test set
28553-12-0	CC(C)CCCCCCOC(=O)c1ccccc1C(=O)OCCCCCCC(C)C	0.06	EC50	1	Test set
287-92-3	C1CCCC1	10.5199	EC50	0	Test set
107-41-5	CC(O)CC(C)(C)O	3200	EC50	0	Test set
701-82-6	NC(=O)Nc1cccc(O)c1	93	EC50	0	Test set
549-18-8	CN(C)CCC=C1c2ccccc2CCc3ccccc13	4.82	EC50	1	Test set
62571-86-2	C[C@H](CS)C(=O)N1CCC[C@H]1C(=O)O	100	EC50	0	Test set
79-09-4	CCC(=O)O	22.7	EC50	0	Test set
547-64-8	COC(=O)C(C)O	780	EC50	0	Test set
21535-47-7	CN1CCN2C(C1)c3ccccc3Cc4ccccc24	7.81	EC50	1	Test set
14062-34-1	NNC(=O)c1cccc(N)c1	2.3	EC50	1	Test set
556-61-6	CN=C=S	0.055	EC50	1	Test set
27304-13-8	ClC1C2C(C3OC13Cl)C4(Cl)C(=C(Cl)C2(Cl)C4(Cl)Cl)Cl	1.3	EC50	1	Test set
68424-85-1	CCCCCCCCCCCCCC[N+](C)(C)Cc1ccccc1	0.037	EC50	1	Test set
110-96-3	CC[C@@H](C)N[C@@H](C)CC	35	EC50	0	Test set
99607-70-2	CCCCCC(C)OC(=O)COc1ccc(Cl)c2cccnc12	79.6	EC50	0	Test set
76-03-9	OC(=O)C(Cl)(Cl)Cl	146	EC50	0	Test set
92-24-0	c1ccc2cc3cc4ccccc4cc3cc2c1	0.00232854	EC50	1	Test set
76738-62-0	CC(C)(C)[C@@H](O)C(Cc1ccc(Cl)cc1)n2cncn2	94	EC50	0	Test set
29122-68-7	CC(C)NCC(O)COc1ccc(CC(=O)N)cc1	313	EC50	0	Test set
5538-94-3	CCCCCCCC[N+](C)(C)CCCCCCCC	0.1	EC50	1	Test set
62-74-8	OC(=O)CF	350	EC50	0	Test set
141776-32-1	CCS(=O)(=O)c1nc2ccccn2c1S(=O)(=O)NC(=O)Nc3nc(OC)cc(OC)n3	96	EC50	0	Test set
52508-35-7	CC1(C)OC[C@@H]2O[C@]3(OC(C)(C)O[C@H]3[C@@H]2O1)C(=O)O	10000	EC50	0	Test set
55219-65-3	CC(C)(C)C(O)C(Oc1ccc(Cl)cc1)n2cncn2	2.5	EC50	1	Test set
136-45-8	CCCOC(=O)c1ccc(nc1)C(=O)OCCC	18	EC50	0	Test set
68-22-4	C[C@]12CC[C@H]3[C@@H](CCC4=CC(=O)CC[C@H]34)[C@@H]1CC[C@@]2(O)C#C	6.41	EC50	1	Test set
2303-17-5	CC(C)N(C(C)C)C(=O)SCC(=C(Cl)Cl)Cl	0.43	EC50	1	Test set
6382-06-5	CCCCCOC(=O)C(C)O	238	EC50	0	Test set
68-12-2	CN(C)C=O	15700	EC50	0	Test set
88-75-5	Oc1ccccc1[N+](=O)[O-]	17	EC50	0	Test set
114311-32-9	COCc1cnc(C2=NC(=O)C(C)(N2)C(C)C)c(c1)C(=O)O	122	EC50	0	Test set
219714-96-2	COc1cnc(OC)n2nc(NS(=O)(=O)c3c(OCC(F)F)cccc3C(F)(F)F)nc12	90.1	EC50	0	Test set
111-18-2	CN(C)CCCCCCN(C)C	6.94	EC50	1	Test set
53404-22-1	CC(Oc1cccc(Cl)c1)C(=O)O	902	EC50	0	Test set
610-02-6	OC(=O)c1ccc(O)c(O)c1O	11.7	EC50	0	Test set
149-91-7	OC(=O)c1cc(O)c(O)c(O)c1	19.1	EC50	0	Test set
26644-46-2	ClC(Cl)(Cl)C(NC=O)N1CCN(CC1)C(NC=O)C(Cl)(Cl)Cl	9.7	EC50	1	Test set
25812-30-0	Cc1ccc(C)c(OCCCC(C)(C)C(=O)O)c1	22.85	EC50	0	Test set
68-35-9	Nc1ccc(cc1)S(=O)(=O)Nc2ncccn2	212	EC50	0	Test set
55297-96-6	CCN(CC)CCSCC(=O)O[C@@H]1C[C@@](C)(C=C)[C@@H](O)[C@H](C)C23CC[C@@H](C)C1(C)[C@H]2C(=O)CC3	40	EC50	0	Test set
99-50-3	OC(=O)c1ccc(O)c(O)c1	370	EC50	0	Test set
93106-60-6	CCN1CCN(CC1)c2cc3N(C=C(C(=O)O)C(=O)c3cc2F)C4CC4	20.1	EC50	0	Test set
19932-84-4	Oc1oc2cc(Cl)ccc2n1	8.4	EC50	1	Test set
335-67-1	OC(=O)C(F)(F)C(F)(F)C(F)(F)C(F)(F)C(F)(F)C(F)(F)C(F)(F)F	476.52	EC50	0	Test set
78-93-3	CCC(=O)C	5091	EC50	0	Test set
617-51-6	CC(C)OC(=O)C(C)O	802	EC50	0	Test set
58-14-0	CCc1nc(N)nc(N)c1c2ccc(Cl)cc2	4.8	EC50	1	Test set
112281-77-3	FC(F)C(F)(F)OCC(Cn1cncn1)c2ccc(Cl)cc2Cl	2.63	EC50	1	Test set
208465-21-8	COC(=O)c1ccc(CNS(=O)(=O)C)cc1S(=O)(=O)NC(=O)Nc2nc(OC)cc(OC)n2	90.2	EC50	0	Test set
621-77-2	CCCCCN(CCCCC)CCCCC	1.6	EC50	1	Test set
253-52-1	c1ccc2cnncc2c1	445	EC50	0	Test set
10453-86-8	CC(=CC1C(C(=O)OCc2coc(Cc3ccccc3)c2)C1(C)C)C	0.00022	EC50	1	Test set
4658-28-0	CSc1nc(NC(C)C)nc(N=[N+]=[N-])n1	26	EC50	0	Test set
25154-52-3	CCCCCCCCCc1ccccc1O	0.104	EC50	1	Test set
220899-03-6	COc1cc(C)c(C(=O)c2c(C)c(Br)ccc2OC)c(OC)c1OC	92	EC50	0	Test set
60-57-1	ClC1=C(Cl)C2(Cl)C3C4CC(C5OC45)C3C1(Cl)C2(Cl)Cl	0.0795	EC50	1	Training set
303-07-1	OC(=O)c1c(O)cccc1O	10.6	EC50	0	Training set
709-98-8	CCC(=O)Nc1ccc(Cl)c(Cl)c1	6.7	EC50	1	Training set
67-66-3	ClC(Cl)Cl	51.5713	EC50	0	Training set
101-54-2	Nc1ccc(Nc2ccccc2)cc1	0.37	EC50	1	Training set
105-39-5	CCOC(=O)CCl	1.6	EC50	1	Training set
1861-32-1	COC(=O)c1c(Cl)c(Cl)c(C(=O)OC)c(Cl)c1Cl	138	EC50	0	Training set
9016-45-9	CCCCCCCCCc1ccc(OCCOCCO)cc1	12.2	EC50	0	Training set
111-77-3	COCCOCCO	930	EC50	0	Training set
77182-82-2	CP(=O)(O)CCC(N)C(=O)O	15	EC50	0	Training set
24017-47-8	CCOP(=S)(OCC)Oc1ncn(n1)c2ccccc2	0.01292	EC50	1	Training set
145701-23-1	COc1ncc(F)c2nc(nn12)S(=O)(=O)Nc3c(F)cccc3F	5.5	EC50	1	Training set
303-38-8	OC(=O)c1cccc(O)c1O	447	EC50	0	Training set
59756-60-4	CN1C=C(C(=O)C(=C1)c2cccc(c2)C(F)(F)F)c3ccccc3	3	EC50	1	Training set
7166-19-0	[O-][N+](=O)\C(=C/c1ccccc1)\Br	0.024	EC50	1	Training set
82027-59-6	OCCN(CCO)CCO	55.7	EC50	0	Training set
67747-09-5	CCCN(CCOc1c(Cl)cc(Cl)cc1Cl)C(=O)n2ccnc2	3.008	EC50	1	Training set
1610-18-0	COc1nc(NC(C)C)nc(NC(C)C)n1	59.8	EC50	0	Training set
4684-94-0	OC(=O)c1cccc(Cl)n1	1.6	EC50	1	Training set
13826-35-2	OCc1cccc(Oc2ccccc2)c1	0.05	EC50	1	Training set
203313-25-1	CCOC(=O)OC1=C(C(=O)N[C@@]12CC[C@@H](CC2)OC)c3cc(C)ccc3C	42.7	EC50	0	Training set
111-26-2	CCCCCCN	8.6	EC50	1	Training set
100-09-4	COc1ccc(cc1)C(=O)O	943	EC50	0	Training set
115136-53-3	CC(C)C1(C)N=C(NC1=O)c2nc(C)ccc2C(=O)O	100	EC50	0	Training set
112410-23-8	CCc1ccc(cc1)C(=O)NN(C(=O)c2cc(C)cc(C)c2)C(C)(C)C	3.8	EC50	1	Training set
330-95-0	[O-][N+](=O)c1ccc(NC(=O)Nc2ccc(cc2)[N+](=O)[O-])cc1	93	EC50	0	Training set
81777-89-1	CC1(C)CON(Cc2ccccc2Cl)C1=O	5.2	EC50	1	Training set
527-60-6	Cc1cc(C)c(O)c(C)c1	3.3	EC50	1	Training set
110-95-2	CN(C)CCCN(C)C	52.8	EC50	0	Training set
112-27-6	OCCOCCOCCO	52400	EC50	0	Training set
143-27-1	CCCCCCCCCCCCCCCCN	0.0036	EC50	1	Training set
21087-64-9	CSC1=NN=C(C(=O)N1N)C(C)(C)C	4.18	EC50	1	Training set
100784-20-1	COC(=O)c1c(Cl)nn(C)c1S(=O)(=O)NC(=O)Nc2nc(OC)cc(OC)n2	107	EC50	0	Training set
51707-55-2	O=C(Nc1ccccc1)Nc2cnns2	5.7	EC50	1	Training set
94-82-6	OC(=O)CCCOc1ccc(Cl)cc1Cl	25	EC50	0	Training set
15922-78-8	ON1C=CC=CC1=S	0.022	EC50	1	Training set
767-00-0	Oc1ccc(cc1)C#N	15	EC50	0	Training set
2122-70-5	CCOC(=O)Cc1cccc2ccccc12	23.8	EC50	0	Training set
26225-79-6	CCOC1Oc2ccc(OS(=O)(=O)C)cc2C1(C)C	64	EC50	0	Training set
110-16-7	OC(=O)\C=C\C(=O)O	316.2	EC50	0	Training set
78491-02-8	OCNC(=O)N(CO)C1N(CO)C(=O)N(CO)C1=O	58	EC50	0	Training set
94-75-7	OC(=O)COc1ccc(Cl)cc1Cl	100	EC50	0	Training set
80-32-0	Nc1ccc(cc1)S(=O)(=O)Nc2ccc(Cl)nn2	375.3	EC50	0	Training set
131929-60-7	CC[C@H]1CCC[C@H](O[C@H]2CC[C@@H]([C@@H](C)O2)N(C)C)[C@@H](C)C(=O)C3=C[C@H]4[C@@H]5C[C@@H](C[C@H]5C=C[C@H]4[C@@H]3CC(=O)O1)O[C@@H]6O[C@@H](C)[C@H](OC)[C@@H](OC)[C@H]6OC	6.5	EC50	1	Training set
98-95-3	[O-][N+](=O)c1ccccc1	34.6	EC50	0	Training set
61718-82-9	COCCCC\C(=N/OCCN)\c1ccc(cc1)C(F)(F)F	13	EC50	0	Training set
126-33-0	O=S1(=O)CCCC1	94	EC50	0	Training set
139968-49-3	FC(F)(F)Oc1ccc(NC(=O)N\N=C(\Cc2ccc(cc2)C#N)/c3cccc(c3)C(F)(F)F)cc1	0.331	EC50	1	Training set
27314-13-2	CNC1=C(Cl)C(=O)N(N=C1)c2cccc(c2)C(F)(F)F	15	EC50	0	Training set
71-23-8	CCCO	3644	EC50	0	Training set
7775-09-9	OCl(=O)=O	919.3	EC50	0	Training set
79-33-4	C[C@H](O)C(=O)O	750	EC50	0	Training set
64-19-7	CC(=O)O	65	EC50	0	Training set
658066-35-4	FC(F)(F)c1cnc(CCNC(=O)c2ccccc2C(F)(F)F)c(Cl)c1	17	EC50	0	Training set
298-46-4	NC(=O)N1c2ccccc2C=Cc3ccccc13	97.8154	EC50	0	Training set
85721-33-1	OC(=O)C1=CN(C2CC2)c3cc(N4CCNCC4)c(F)cc3C1=O	1	EC50	1	Training set
335104-84-2	CS(=O)(=O)c1ccc(C(=O)C2C(=O)CCCC2=O)c(Cl)c1COCC(F)(F)F	48.9	EC50	0	Training set
116-06-3	CNC(=O)O\N=C\C(C)(C)SC	0.4107	EC50	1	Training set
77-09-8	Oc1ccc(cc1)C2(OC(=O)c3ccccc23)c4ccc(O)cc4	6.72	EC50	1	Training set
115-77-5	OCC(CO)(CO)CO	33600	EC50	0	Training set
82633-79-2	CN1SC2=C(CCC2)C1=O	1.3	EC50	1	Training set
57966-95-7	CCNC(=O)NC(=O)\C(=N\OC)\C#N	28	EC50	0	Training set
129909-90-6	CC(C)C1=NN(C(=O)NC(C)(C)C)C(=O)N1N	40.8	EC50	0	Training set
59-06-3	CCOc1cc(NC(=O)C)ccc1C(=O)OC	170	EC50	0	Training set
556-88-7	NC(=N)N[N+](=O)[O-]	1024	EC50	0	Training set
2227-17-0	ClC1=C(Cl)C(Cl)(C(=C1Cl)Cl)C2(Cl)C(=C(Cl)C(=C2Cl)Cl)Cl	1.2	EC50	1	Training set
55406-53-6	CCCCNC(=O)OCC#CI	0.16	EC50	1	Training set
52-68-6	COP(=O)(OC)C(O)C(Cl)(Cl)Cl	0.00035	EC50	1	Training set
91-22-5	c1ccc2ncccc2c1	51.3	EC50	0	Training set
117-79-3	Nc1ccc2C(=O)c3ccccc3C(=O)c2c1	378	EC50	0	Training set
8000-48-4	CC12CCC(CC1)C(C)(C)O2	143.96	EC50	0	Training set
57-06-7	C=CCN=C=S	0.73	EC50	1	Training set
950782-86-2	CC(F)c1nc(N)nc(N[C@@H]2[C@@H](C)Cc3ccc(C)cc23)n1	9.88	EC50	1	Training set
34014-18-1	CNC(=O)N(C)c1nnc(s1)C(C)(C)C	297	EC50	0	Training set
1031-07-8	ClC1=C(Cl)C2(Cl)C3COS(=O)(=O)OCC3C1(Cl)C2(Cl)Cl	0.92	EC50	1	Training set
100473-08-3	O=P(Oc1ccccc1)(Oc2ccccc2)Oc3ccccc3	0.25	EC50	1	Training set
83-66-9	COc1c(c(C)c(cc1C(C)(C)C)[N+](=O)[O-])[N+](=O)[O-]	0.62	EC50	1	Training set
957-51-7	CN(C)C(=O)C(c1ccccc1)c2ccccc2	58	EC50	0	Training set
102-97-6	CC(C)NCc1ccccc1	38.5	EC50	0	Training set
26530-20-1	CN1SC=CC1=O	0.107	EC50	1	Training set
143390-89-0	CO\N=C(\C(=O)OC)/c1ccccc1COc2ccccc2C	0.332	EC50	1	Training set
1918-02-1	Nc1c(Cl)c(Cl)nc(C(=O)O)c1Cl	76	EC50	0	Training set
1138-52-9	CC(C)(C)c1cc(O)cc(c1)C(C)(C)C	1.7	EC50	1	Training set
112-30-1	CCCCCCCCCCO	6.51	EC50	1	Training set
105726-67-8	CCCC(CC)(CCC)C(=O)NC	130	EC50	0	Training set
616-09-1	CCCOC(=O)C(C)O	413	EC50	0	Training set
907204-31-3	Cn1cc(C(=O)Nc2ccccc2c3cc(F)c(F)c(F)c3)c(n1)C(F)F	104	EC50	0	Training set
124-18-5	CCCCCCCCCC	0.0284564	EC50	1	Training set
118-52-5	CC1(C)N(Cl)C(=O)N(Cl)C1=O	0.84	EC50	1	Training set
13071-79-9	CCOP(=S)(OCC)SCSC(C)(C)C	0.00031	EC50	1	Training set
66841-25-6	CC1(C)[C@@H](C(Br)C(Br)(Br)Br)[C@H]1C(=O)O[C@H](C#N)c2cccc(Oc3ccccc3)c2	0.055	EC50	1	Training set
75-87-6	ClC(Cl)(Cl)C=O	112	EC50	0	Training set
101-83-7	C1CCC(CC1)NC2CCCCC2	70.1	EC50	0	Training set
210880-92-5	CN=C(NCc1cnc(Cl)s1)N[N+](=O)[O-]	119	EC50	0	Training set
86209-51-0	COC(=O)c1ccccc1S(=O)(=O)NC(=O)Nc2nc(OC(F)F)cc(OC(F)F)n2	100	EC50	0	Training set
148-01-6	Cc1c(cc(cc1[N+](=O)[O-])[N+](=O)[O-])C(=O)N	155	EC50	0	Training set
12771-68-5	COc1ccc(cc1)C(O)(C2CC2)c3cncnc3	100	EC50	0	Training set
13171-21-6	CCN(CC)C(=O)\C(=C(/C)\OP(=O)(OC)OC)\Cl	0.0127	EC50	1	Training set
42017-89-0	CC(C)(Oc1ccc(cc1)C(=O)c2ccc(Cl)cc2)C(=O)O	4.9	EC50	1	Training set
96-09-3	C1OC1c2ccccc2	11.6	EC50	0	Training set
85-69-8	CCCCOC(=O)c1ccccc1C(=O)OCC(CC)CCCC	0.07	EC50	1	Training set
578-54-1	CCc1ccccc1N	14	EC50	0	Training set
33693-04-8	CCNc1nc(NC(C)(C)C)nc(OC)n1	44	EC50	0	Training set
4455-26-9	CCCCCCCCN(C)CCCCCCCC	0.12	EC50	1	Training set
87674-68-8	COCC(C)N(C(=O)CCl)c1c(C)csc1C	16	EC50	0	Training set
97780-06-8	CCOc1nc(NC)nc(NC(=O)NS(=O)(=O)c2ccccc2C(=O)OC)n1	550	EC50	0	Training set
53042-79-8	CCCC\C=C\CC\C=C/CCCCCCOC(=O)C	0.28	EC50	1	Training set
55179-31-2	CC(C)(C)C(O)C(Oc1ccc(cc1)c2ccccc2)n3cncn3	4.7	EC50	1	Training set
1897-45-6	Clc1c(Cl)c(C#N)c(Cl)c(C#N)c1Cl	0.18	EC50	1	Training set
35691-65-7	BrCC(Br)(CCC#N)C#N	2.2	EC50	1	Training set
107534-96-3	CC(C)(C)C(O)(CCc1ccc(Cl)cc1)Cn2cncn2	2.88	EC50	1	Training set
741-58-2	CC(C)OP(=S)(OC(C)C)SCCNS(=O)(=O)c1ccccc1	0.58	EC50	1	Training set
101-27-9	ClCC#CCOC(=O)Nc1cccc(Cl)c1	0.43	EC50	1	Training set
59-40-5	Nc1ccc(cc1)S(=O)(=O)Nc2cnc3ccccc3n2	131	EC50	0	Training set
26062-79-3	C[N+](C)(CC=C)CC=C	0.075	EC50	1	Training set
834-12-8	CCNc1nc(NC(C)C)nc(SC)n1	40	EC50	0	Training set
301-12-2	CCS(=O)CCSP(=O)(OC)OC	0.24	EC50	1	Training set
13684-63-4	COC(=O)Nc1cccc(OC(=O)Nc2cccc(C)c2)c1	14	EC50	0	Training set
88-72-2	Cc1ccccc1[N+](=O)[O-]	5.4	EC50	1	Training set
27519-02-4	CCCCCCCCCCCCC\C=C/CCCCCCCC	0.265	EC50	1	Training set
108-87-2	Cc1ccccc1	1.47279	EC50	1	Training set
43222-48-6	C[n+]1c(cc(c2ccccc2)n1C)c3ccccc3	2.53	EC50	1	Training set
83055-99-6	COC(=O)c1ccccc1CS(=O)(=O)NC(=O)Nc2nc(OC)cc(OC)n2	99	EC50	0	Training set
142-59-6	SC(=S)NCCNC(=S)S	5.6	EC50	1	Training set
67-72-1	ClC(Cl)(Cl)C(Cl)(Cl)Cl	1.8	EC50	1	Training set
606-20-2	Cc1c(cccc1[N+](=O)[O-])[N+](=O)[O-]	21.7	EC50	0	Training set
87820-88-0	CCO\N=C(/CC)\C1=C(O)CC(CC1=O)c2c(C)cc(C)cc2C	1.97	EC50	1	Training set
134098-61-6	Cc1nn(C)c(Oc2ccccc2)c1\C=N\OCc3ccc(cc3)C(=O)OC(C)(C)C	0.0036	EC50	1	Training set
2527-66-4	CN1Sc2ccccc2C1=O	0.92	EC50	1	Training set
66423-09-4	C[C@H](Oc1ccc(Cl)cc1C)C(=O)ON(C)C	256	EC50	0	Training set
84-66-2	CCOC(=O)c1ccccc1C(=O)OCC	86	EC50	0	Training set
361377-29-9	CO\N=C(\C1=NOCCO1)/c2ccccc2Oc3ncnc(Oc4ccccc4Cl)c3F	0.48	EC50	1	Training set
58138-08-2	Clc1cc(Cl)cc(c1)C2(CC(Cl)(Cl)Cl)CO2	0.25	EC50	1	Training set
90982-32-4	CCOC(=O)c1ccccc1S(=O)(=O)NC(=O)Nc2nc(Cl)cc(OC)n2	10	EC50	1	Training set
13311-84-7	CC(C)C(=O)Nc1ccc(c(c1)C(F)(F)F)[N+](=O)[O-]	2.7	EC50	1	Training set
126-11-4	OCC(CO)(CO)[N+](=O)[O-]	80	EC50	0	Training set
188489-07-8	CCOC(=O)COc1cc(N2N=CC(=C(C)C2=O)C(F)(F)F)c(F)cc1Cl	3	EC50	1	Training set
999-81-5	C[N+](C)(C)CCCl	16.7	EC50	0	Training set
74051-80-2	CCC\C(=N/OCC)\C1=C(O)C[C@@H](C[C@H](C)SCC)CC1=O	2.6	EC50	1	Training set
91-94-1	Nc1ccc(cc1Cl)c2ccc(N)c(Cl)c2	1.05	EC50	1	Training set
10265-92-6	COP(=O)(N)SC	0.026	EC50	1	Training set
31218-83-4	CCNP(=S)(OC)O\C(=C/C(=O)OC(C)C)\C	0.0033	EC50	1	Training set
11067-81-5	CC1Cc2c3C(C)Cc3c4C(C)C5(CC5C)c4c2S(=O)(=O)O1	4	EC50	1	Training set
367-25-9	Nc1ccc(F)cc1F	3.2	EC50	1	Training set
365400-11-9	Cc1nn(C)c(O)c1C(=O)c2ccc(cc2S(=O)(=O)C)C(F)(F)F	95.8	EC50	0	Training set
1689-84-5	Oc1c(Br)cc(cc1Br)C#N	74	EC50	0	Training set
74115-24-5	Clc1ccccc1c2nnc(nn2)c3ccccc3Cl	0.00084	EC50	1	Training set
117337-19-6	COC(=O)CSc1cc(N=C2SC(=O)N3CCCCN23)c(F)cc1Cl	2.3	EC50	1	Training set
115-31-1	CC1(C)[C@@H]2CC[C@]1(C)[C@H](C2)OC(=O)CSC#N	0.115	EC50	1	Training set
4180-23-8	COc1ccc(\C=C\C)cc1	4.25	EC50	1	Training set
58-08-2	CN1C(=O)N(C)c2ncn(C)c2C1=O	177.8	EC50	0	Training set
108-90-7	Clc1ccccc1	0.585296	EC50	1	Training set
107-07-3	OCCCl	212.556	EC50	0	Training set
700-38-9	Cc1ccc(c(O)c1)[N+](=O)[O-]	21.3	EC50	0	Training set
138-86-3	CC(=C)C1CCC(=CC1)C	39	EC50	0	Training set
94-13-3	CCCOC(=O)c1ccc(O)cc1	15.4	EC50	0	Training set
160-02-1	C1CC23C(=CC1=C4COC=C24)C=Cc5ccccc35	100	EC50	0	Training set
23422-53-9	CNC(=O)Oc1cccc(c1)N=CN(C)C	0.0868	EC50	1	Training set
619-24-9	[O-][N+](=O)c1cccc(c1)C#N	48.1	EC50	0	Training set
121-14-2	Cc1ccc(cc1[N+](=O)[O-])[N+](=O)[O-]	35	EC50	0	Training set
108731-70-0	CS(=O)(=O)NC(=O)c1cc(Oc2ccc(cc2Cl)C(F)(F)F)ccc1[N+](=O)[O-]	294	EC50	0	Training set
99-85-4	CC(C)C1=CCC(=CC1)C	3.45	EC50	1	Training set
7673-09-8	ClNc1nc(NCl)nc(NCl)n1	1.2	EC50	1	Training set
121-34-6	COc1cc(ccc1O)C(=O)O	908	EC50	0	Training set
28711-29-7	OC(=O)Cn1cncn1	108	EC50	0	Training set
144550-36-7	COC(=O)c1ccc(I)cc1S(=O)(=NC(=O)Nc2nc(C)nc(OC)n2)O	86.9	EC50	0	Training set
165252-70-0	CN=C(NCC1CCOC1)N[N+](=O)[O-]	110.6	EC50	0	Training set
104040-78-0	COc1cc(OC)nc(NC(=O)NS(=O)(=O)c2ncccc2C(F)(F)F)n1	106	EC50	0	Training set
738-70-5	COc1cc(Cc2cnc(N)nc2N)cc(OC)c1OC	167.4	EC50	0	Training set
1111-67-7	SC#N	0.02	EC50	1	Training set
55290-64-7	CC1=C(C)S(=O)(=O)CCS1(=O)=O	6.6	EC50	1	Training set
133-07-3	ClC(Cl)(Cl)SN1C(=O)c2ccccc2C1=O	0.02	EC50	1	Training set
138-93-2	SC(=S)NC#N	8.3	EC50	1	Training set
4559-79-9	CN(C)C\C=C\CN(C)C	35.5	EC50	0	Training set
33089-61-1	CN(C=Nc1ccc(C)cc1C)C=Nc2ccc(C)cc2C	0.035	EC50	1	Training set
83588-43-6	CC1=CC(=O)C(=NN1c2ccc(Cl)cc2)C(=O)O	188	EC50	0	Training set
89-86-1	OC(=O)c1ccc(O)cc1O	120	EC50	0	Training set
79-00-5	ClCC(Cl)Cl	81	EC50	0	Training set
17321-77-6	CN(C)CCCN1c2ccccc2CCc3ccc(Cl)cc13	2.74	EC50	1	Training set
57837-19-1	COCC(=O)N(C(C)C(=O)OC)c1c(C)cccc1C	12.5	EC50	0	Training set
81052-29-1	CCN1C(=CC(=O)C(=C1c2ccc(Cl)cc2)C(=O)O)C	1150	EC50	0	Training set
107-06-2	ClCCCl	324	EC50	0	Training set
50723-80-3	CC(C)N1C(=O)c2ccccc2NS1(=O)=O	125	EC50	0	Training set
317815-83-1	COC(=O)c1csc(C)c1S(=O)(=O)NC(=O)N2N=C(OC)N(C)C2=O	98.6	EC50	0	Training set
66215-27-8	Nc1nc(N)nc(NC2CC2)n1	5.08	EC50	1	Training set
29761-21-5	CC(C)CCCCCCCOP(=O)(Oc1ccccc1)Oc2ccccc2	0.48	EC50	1	Training set
62732-91-6	CCOCCOCCOC(=O)Nc1nc2ccccc2[nH]1	2700	EC50	0	Training set
66330-88-9	OC(=O)[C@@H]1[C@H]2O[C@H](C=C2)[C@@H]1C(=O)O	0.32	EC50	1	Training set
2008-41-5	CCSC(=O)N(CC(C)C)CC(C)C	11.9	EC50	0	Training set
623-05-2	OCc1ccc(O)cc1	29.8	EC50	0	Training set
118-93-4	CC(=O)c1ccccc1O	56.5	EC50	0	Training set
2312-35-8	CC(C)(C)c1ccc(OC2CCCCC2OS(=O)OCC#C)cc1	0.091	EC50	1	Training set
1134-23-2	CCSC(=O)N(CC)C1CCCCC1	24	EC50	0	Training set
94-74-6	Cc1cc(Cl)ccc1OCC(=O)O	180	EC50	0	Training set
1596-84-5	CN(C)NC(=O)CCC(=O)O	101	EC50	0	Training set
16672-87-0	OP(=O)(O)CCCl	31.7	EC50	0	Training set
2691-41-0	[O-][N+](=O)N1CN(CN(CN(C1)[N+](=O)[O-])[N+](=O)[O-])[N+](=O)[O-]	32	EC50	0	Training set
87392-12-9	CCc1cccc(C)c1N([C@@H](C)COC)C(=O)CCl	26	EC50	0	Training set
100-97-0	C1N2CN3CN(CN1C3)C2	36000	EC50	0	Training set
2528-16-7	OC(=O)c1ccccc1C(=O)OCc2ccccc2	160	EC50	0	Training set
120116-88-3	CN(C)S(=O)(=O)n1c(nc(Cl)c1c2ccc(C)cc2)C#N	0.158	EC50	1	Training set
99-10-5	OC(=O)c1cc(O)cc(O)c1	616	EC50	0	Training set
24307-26-4	C[N+]1(C)CCCCC1	106	EC50	0	Training set
59-87-0	NC(=O)N\N=C\c1oc(cc1)[N+](=O)[O-]	28.67	EC50	0	Training set
94125-34-5	COc1nc(C)nc(NC(=O)NS(=O)(=O)c2ccccc2CCC(F)(F)F)n1	120	EC50	0	Training set
113158-40-0	CC(Oc1ccc(Oc2oc3cc(Cl)ccc3n2)cc1)C(=O)O	32	EC50	0	Training set
154-21-2	CCC[C@@H]1C[C@H](N(C)C1)C(=O)N[C@H]([C@@H](C)O)[C@H]2O[C@H](SC)[C@H](O)[C@@H](O)[C@H]2O	500	EC50	0	Training set
78246-49-8	Fc1ccc(cc1)[C@@H]2CCNC[C@H]2COc3ccc4OCOc4c3	6.24	EC50	1	Training set
78-70-6	CC(=CCCC(C)(O)C=C)C	36.7	EC50	0	Training set
1912-24-9	CCNc1nc(Cl)nc(NC(C)C)n1	115	EC50	0	Training set
31430-15-6	COC(=O)Nc1nc2cc(ccc2[nH]1)C(=O)c3ccc(F)cc3	0.0701	EC50	1	Training set
19329-89-6	CC(C)CCOC(=O)C(C)O	193	EC50	0	Training set
79617-96-2	CN[C@H]1CC[C@@H](c2ccc(Cl)c(Cl)c2)c3ccccc13	0.56	EC50	1	Training set
79-94-7	CC(C)(c1cc(Br)c(O)c(Br)c1)c2cc(Br)c(O)c(Br)c2	7.9	EC50	1	Training set
123-31-9	Oc1ccc(O)cc1	0.13	EC50	1	Training set
163520-33-0	CCOC(=O)C1=NOC(C1)(c2ccccc2)c3ccccc3	0.51	EC50	1	Training set
124-11-8	CCCCCCCC=C	3.2	EC50	1	Training set
86-74-8	c1ccc2c(c1)[nH]c3ccccc23	3.35	EC50	1	Training set
67485-29-4	CC1(C)CNC(=NC1)NN=C(\C=C\c2ccc(cc2)C(F)(F)F)\C=C\c3ccc(cc3)C(F)(F)F	0.13	EC50	1	Training set
104-42-7	CCCCCCCCCCCCc1ccc(N)cc1	0.00071	EC50	1	Training set
307-55-1	OC(=O)C(F)(F)C(F)(F)C(F)(F)C(F)(F)C(F)(F)C(F)(F)C(F)(F)C(F)(F)C(F)(F)C(F)(F)C(F)(F)F	79.2186	EC50	0	Training set
95-93-2	Cc1cc(C)c(C)cc1C	0.469763	EC50	1	Training set
300-76-5	COP(=O)(OC)OC(Br)C(Cl)(Cl)Br	0.0029	EC50	1	Training set
100-01-6	Nc1ccc(cc1)[N+](=O)[O-]	17	EC50	0	Training set
2426-08-6	CCCCOCC1CO1	3.9	EC50	1	Training set
116714-46-6	FC(OC(F)(F)F)C(F)(F)Oc1ccc(NC(=O)NC(=O)c2c(F)cccc2F)cc1Cl	0.00431	EC50	1	Training set
2439-35-2	CN(C)CCOC(=O)C=C	711	EC50	0	Training set
154-21-2	CS[C@H]1O[C@H]([C@H](NC(=O)[C@@H]2C[C@@H](CCCO)CN2C)[C@@H](C)O)[C@H](O)[C@H](O)[C@H]1O	500	EC50	0	Training set
88-99-3	OC(=O)c1ccccc1C(=O)O	640	EC50	0	Training set
77-99-6	CCC(CO)(CO)CO	13000	EC50	0	Training set
57-55-6	CC(O)CO	110	EC50	0	Training set
67-64-1	CC(=O)C	13500	EC50	0	Training set
100-02-7	Oc1ccc(cc1)[N+](=O)[O-]	4.7	EC50	1	Training set
1214-39-7	C(Nc1[nH]cnc2ncnc12)c3ccccc3	20.5	EC50	0	Training set
5902-51-2	CC1=C(Cl)C(=O)N(C(=O)N1)C(C)(C)C	65	EC50	0	Training set
112143-82-5	CCOC(=O)CSc1nc(nn1C(=O)N(C)C)C(C)(C)C	0.014	EC50	1	Training set
8000-29-1	CC(CCC=C(C)C)CC=O	26.4	EC50	0	Training set
374726-62-2	COc1cc(CCNC(=O)[C@H](OCC#C)c2ccc(Cl)cc2)ccc1OCC#C	7.1	EC50	1	Training set
865363-39-9	CCCCC(CC)COC(=O)[C@@H](C)Oc1ccc(Cl)cc1Cl	1.5	EC50	1	Training set
98-17-9	Oc1cccc(c1)C(F)(F)F	11	EC50	0	Training set
73231-34-2	CS(=O)(=O)c1ccc(cc1)[C@@H](O)[C@@H](CF)NC(=O)C(Cl)Cl	337	EC50	0	Training set
181274-15-7	CCCOC1=NN(C(=O)N=S(=O)(O)c2ccccc2C(=O)OC)C(=O)N1C	107	EC50	0	Training set
63-25-2	CNC(=O)Oc1cccc2ccccc12	0.0126769	EC50	1	Training set
603-83-8	Cc1c(N)cccc1[N+](=O)[O-]	13.2	EC50	0	Training set
76674-21-0	OC(Cn1cncn1)(c2ccc(F)cc2)c3ccccc3F	7.05	EC50	1	Training set
86-50-0	COP(=S)(OC)SCN1N=Nc2ccccc2C1=O	0.0044	EC50	1	Training set
1918-16-7	CC(C)N(C(=O)CCl)c1ccccc1	6.9	EC50	1	Training set
96-18-4	ClCC(Cl)CCl	33.8	EC50	0	Training set
104206-82-8	CS(=O)(=O)c1ccc(C(=O)C2C(=O)CCCC2=O)c(c1)[N+](=O)[O-]	840	EC50	0	Training set
133-32-4	OC(=O)CCCc1c[nH]c2ccccc12	57	EC50	0	Training set
97-64-3	CCOC(=O)C(C)O	560	EC50	0	Training set
21564-17-0	N#CSCSc1nc2ccccc2s1	0.023	EC50	1	Training set
101-05-3	Clc1ccccc1Nc2nc(Cl)nc(Cl)n2	0.949	EC50	1	Training set
314-40-9	CCC(C)N1C(=O)NC(=C(Br)C1=O)C	121	EC50	0	Training set
113-48-4	CCCCC(CC)CN1C(=O)C2C3CC(C=C3)C2C1=O	2.3	EC50	1	Training set
61-82-5	Nc1nc[nH]n1	6.9	EC50	1	Training set
75-31-0	CC(C)N	91.6	EC50	0	Training set
13863-41-7	ClBr	0.71	EC50	1	Training set
618-85-9	Cc1cc(cc(c1)[N+](=O)[O-])[N+](=O)[O-]	45.1	EC50	0	Training set
28159-98-0	CSc1nc(NC2CC2)nc(NC(C)(C)C)n1	5.3	EC50	1	Training set
122548-33-8	COc1cc(OC)nc(NC(=O)NS(=O)(=O)c2c(Cl)nc3ccccn23)n1	32	EC50	0	Training set
335-76-2	OC(=O)C(F)(F)C(F)(F)C(F)(F)C(F)(F)C(F)(F)C(F)(F)C(F)(F)C(F)(F)C(F)(F)F	163.478	EC50	0	Training set
57-92-1	CN[C@H]1[C@H](O)[C@@H](O)[C@H](CO)O[C@H]1O[C@H]2[C@H](O[C@H]3[C@H](O)[C@@H](O)[C@H](N=C(N)N)[C@@H](O)[C@@H]3N=C(N)N)O[C@@H](C)[C@]2(O)C=O	650	EC50	0	Training set
206-44-0	c1ccc2c(c1)c3cccc4cccc2c34	0.00398434	EC50	1	Training set
6753-47-5	CC(O)CN(CC(C)O)CC(C)O	226	EC50	0	Training set
15307-79-6	OC(=O)Cc1ccccc1Nc2c(Cl)cccc2Cl	22.43	EC50	0	Training set
60-51-5	CNC(=O)CSP(=S)(OC)OC	0.56	EC50	1	Training set
12789-03-6	ClC1CC2C(C1Cl)C3(Cl)C(=C(Cl)C2(Cl)C3(Cl)Cl)Cl	0.097	EC50	1	Training set
72490-01-8	CCOC(=O)NCCOc1ccc(Oc2ccccc2)cc1	0.4	EC50	1	Training set
35554-44-0	Clc1ccc(C(Cn2ccnc2)OCC=C)c(Cl)c1	3.54	EC50	1	Training set
88-74-4	Nc1ccccc1[N+](=O)[O-]	4.89	EC50	1	Training set
75-09-2	ClCCl	135.807	EC50	0	Training set
57-62-5	CN(C)[C@H]1[C@@H]2C[C@H]3C(=C(O)[C@]2(O)C(=C(C(=O)N)C1=O)O)C(=O)c4c(O)ccc(Cl)c4[C@@]3(C)O	400	EC50	0	Training set
1646-88-4	CNC(=O)O\N=C\C(C)(C)S(=O)(=O)C	0.28	EC50	1	Training set
131-70-4	CCCCOC(=O)c1ccccc1C(=O)O	320	EC50	0	Training set
110-58-7	CCCCCN	56	EC50	0	Training set
51481-61-9	CN=C(NCCSCc1[nH]cnc1C)NC#N	379.7	EC50	0	Training set
55-38-9	COP(=S)(OC)Oc1ccc(SC)c(C)c1	0.05	EC50	1	Training set
57960-19-7	CCCCCCCCCCCCC1=C(OC(=O)C)C(=O)c2ccccc2C1=O	0.0027	EC50	1	Training set
3567-25-7	OS(=O)(=O)c1cc(Cl)ccc1Oc2ccc(Cl)cc2NC(=O)Nc3ccc(Cl)c(Cl)c3	9.46	EC50	1	Training set
4080-31-3	Cl\C=C\C[N+]12CN3CN(CN(C3)C1)C2	27	EC50	0	Training set
92-87-5	Nc1ccc(cc1)c2ccc(N)cc2	0.6	EC50	1	Training set
129630-19-9	CCOC(=O)COc1cc(c(F)cc1Cl)c2nn(C)c(OC(F)F)c2Cl	0.76	EC50	1	Training set
94361-06-5	CC(C1CC1)C(O)(Cn2cncn2)c3ccc(Cl)cc3	26	EC50	0	Training set
1910-42-5	C[n+]1ccc(cc1)c2cc[n+](C)cc2	1.25	EC50	1	Training set
6317-18-6	N#CSCSC#N	0.039	EC50	1	Training set
125590-73-0	CCCCC(CC)COC1OC(CO)C(O)C(O)C1O	102	EC50	0	Training set
29232-93-7	CCN(CC)c1nc(C)cc(OP(=S)(OC)OC)n1	0.00011	EC50	1	Training set
123-54-6	CC(=O)CC(=O)C	75	EC50	0	Training set
3337-71-1	COC(=O)NS(=O)(=O)c1ccc(N)cc1	27	EC50	0	Training set
26787-78-0	CC1(C)S[C@@H]2[C@H](NC(=O)[C@H](N)c3ccc(O)cc3)C(=O)N2[C@H]1C(=O)O	1000	EC50	0	Training set
56425-91-3	CC(C)C(O)(c1ccc(OC(F)(F)F)cc1)c2cncnc2	10.3	EC50	0	Training set
7664-38-2	OP(=O)(O)O	105	EC50	0	Training set
141112-29-0	CS(=O)(=O)c1cc(ccc1C(=O)c2cnoc2C3CC3)C(F)(F)F	1.5	EC50	1	Training set
112-12-9	CCCCCCCCCC(=O)C	0.54	EC50	1	Training set
422556-08-9	COc1cc(OC)n2nc(NS(=O)(=O)c3c(OC)nccc3C(F)(F)F)nc2n1	100	EC50	0	Training set
91-53-2	CCOc1ccc2NC(C)(C)C=C(C)c2c1	2	EC50	1	Training set
82-45-1	Nc1cccc2C(=O)c3ccccc3C(=O)c12	82.3	EC50	0	Training set
83-32-9	C1Cc2cccc3cccc1c23	3.45	EC50	1	Training set
122931-48-0	CCS(=O)(=O)c1cccnc1S(=O)(=O)NC(=O)Nc2nc(OC)cc(OC)n2	360	EC50	0	Training set
1420-04-8	Oc1ccc(Cl)cc1C(=O)Nc2ccc(cc2Cl)[N+](=O)[O-]	0.32	EC50	1	Training set
26760-64-5	CCC(=C)C	30	EC50	0	Training set
2439-00-1	OC(=O)Cc1c(Cl)ccc(Cl)c1Cl	100	EC50	0	Training set
1076-46-6	Nc1cc(Cl)cc(C(=O)O)c1Cl	1000	EC50	0	Training set
64036-43-7	CSc1nc2ccccc2s1	10	EC50	1	Training set
99-65-0	[O-][N+](=O)c1cccc(c1)[N+](=O)[O-]	53	EC50	0	Training set
6393-42-6	Cc1cc(c(N)c(c1)[N+](=O)[O-])[N+](=O)[O-]	13.1	EC50	0	Training set
72-17-3	CC(O)C(=O)O	2050	EC50	0	Training set
75-65-0	CC(C)(C)O	5504	EC50	0	Training set
88-89-1	Oc1c(cc(cc1[N+](=O)[O-])[N+](=O)[O-])[N+](=O)[O-]	90	EC50	0	Training set
51200-87-4	CC1(C)COCN1	45	EC50	0	Training set
2244-21-5	ClN1C(=O)NC(=O)N(Cl)C1=O	0.66	EC50	1	Training set
97886-45-8	CSC(=O)c1c(CC(C)C)c(C(=O)SC)c(nc1C(F)F)C(F)(F)F	5.2	EC50	1	Training set
71-43-2	c1ccccc1	9.23	EC50	1	Training set
57-68-1	Cc1cc(C)nc(NS(=O)(=O)c2ccc(N)cc2)n1	215.9	EC50	0	Training set
16484-77-8	C[C@@H](Oc1ccc(Cl)cc1C)C(=O)O	90.94	EC50	0	Training set
134-20-3	COC(=O)c1ccccc1N	18.2	EC50	0	Training set
1071-83-6	OC(=O)CNCP(=O)(O)O	2.95	EC50	1	Training set
77732-09-3	COCC(=O)N(N1CCOC1=O)c2c(C)cccc2C	530	EC50	0	Training set
15687-27-1	CC(C)Cc1ccc(cc1)C(C)C(=O)O	34.1	EC50	0	Training set
59729-32-7	CN(C)CCCC1(OCc2cc(ccc12)C#N)c3ccc(F)cc3	20	EC50	0	Training set
7631-90-5	OS(=O)O	140	EC50	0	Training set
123-07-9	CCc1ccc(O)cc1	5.7	EC50	1	Training set
30777-19-6	C1c2ccccc2c3cc4ccccc4cc13	0.104596	EC50	1	Training set
6062-26-6	Cc1cc(Cl)ccc1OCCCC(=O)O	50	EC50	0	Training set
189-55-9	c1ccc2c(c1)cc3ccc4cc5ccccc5c6ccc2c3c46	0.00520073	EC50	1	Training set
81334-34-1	CC(C)C1(C)N=C(NC1=O)c2ncccc2C(=O)O	100	EC50	0	Training set
86-87-3	OC(=O)Cc1cccc2ccccc12	180	EC50	0	Training set
132-66-1	OC(=O)c1ccccc1C(=O)Nc2cccc3ccccc23	118.5	EC50	0	Training set
81741-28-8	CCCCCCCCCCCCC(CCCC)C([PH3+])(CCCC)CCCC	0.0252	EC50	1	Training set
2439-01-2	Cc1ccc2nc3SC(=O)Sc3nc2c1	0.12	EC50	1	Training set
1397-94-0	CCCCCC[C@@H]1[C@@H](OC(=O)CC(C)C)[C@H](C)OC(=O)[C@@H](NC(=O)c2cccc(NC=O)c2O)[C@@H](C)OC1=O	0.005	EC50	1	Training set
42588-37-4	CC(C)CCCC(C)C\C=C\C(=C\C(=O)OCC#C)\C	0.1	EC50	1	Training set
30388-01-3	C[C@H](O)CSS(=O)(=O)C	12	EC50	0	Training set
25167-83-3	Oc1cc(Cl)c(Cl)c(Cl)c1Cl	0.5	EC50	1	Training set
619-72-7	[O-][N+](=O)c1ccc(cc1)C#N	49.4	EC50	0	Training set
79-34-5	ClC(Cl)C(Cl)Cl	25	EC50	0	Training set
50-63-5	CCN(CC)CCCC(C)Nc1ccnc2cc(Cl)ccc12	9.38869	EC50	1	Training set
83-79-4	COc1cc2OC[C@H]3Oc4c5C[C@@H](Oc5ccc4C(=O)[C@H]3c2cc1OC)C(=C)C	0.008	EC50	1	Training set
1929-82-4	Clc1cccc(n1)C(Cl)(Cl)Cl	5.8	EC50	1	Training set
58-89-9	Clc1c(Cl)c(Cl)c(Cl)c(Cl)c1Cl	0.516	EC50	1	Training set
97553-90-7	CC(CN1COC(C)C1)OCOCOCO	98	EC50	0	Training set
78-11-5	[O-][N+](=O)OCC(CO[N+](=O)[O-])(CO[N+](=O)[O-])CO[N+](=O)[O-]	49	EC50	0	Training set
99-55-8	Cc1ccc(cc1N)[N+](=O)[O-]	22.5	EC50	0	Training set
122453-73-0	CCOCn1c(c2ccc(Cl)cc2)c(C#N)c(Br)c1C(F)(F)F	0.0078	EC50	1	Training set
34375-28-5	OCCNCO	25.2	EC50	0	Training set
1763-23-1	OS(=O)(=O)C(F)(F)C(F)(F)C(F)(F)C(F)(F)C(F)(F)C(F)(F)C(F)(F)C(F)(F)F	37.36	EC50	0	Training set
108-80-5	O=C1NC(=O)NC(=O)N1	1000	EC50	0	Training set
70161-44-3	OCNCC(=O)O	39	EC50	0	Training set
1405-41-0	CN[C@H](C)[C@@H]1CC[C@@H](N)[C@@H](O[C@@H]2[C@@H](N)C[C@@H](N)[C@H](O[C@H]3OC[C@](C)(O)[C@H](NC)[C@H]3O)[C@H]2O)O1	21.2	EC50	0	Training set
108-62-3	CC1OC(C)OC(C)OC(C)O1	77.66	EC50	0	Training set
83-30-7	OC(=O)c1c(O)cc(O)cc1O	1.7	EC50	1	Training set
119-12-0	CCOP(=S)(OCC)OC1=NN(C(=O)C=C1)c2ccccc2	0.00092	EC50	1	Training set
72963-72-5	CC(=CC1C(C(=O)OCN2C(=O)CN(CC#C)C2=O)C1(C)C)C	0.051	EC50	1	Training set
123-08-0	Oc1ccc(C=O)cc1	49.3	EC50	0	Training set
82097-50-5	COc1nc(C)nc(NC(=O)NS(=O)(=O)c2ccccc2OCCCl)n1	100	EC50	0	Training set
80-06-8	CC(O)(c1ccc(Cl)cc1)c2ccc(Cl)cc2	0.27	EC50	1	Training set
121-69-7	CN(C)c1ccccc1	2.3	EC50	1	Training set
99129-21-2	CCS[C@H](C)C[C@@H]1CC(=C(\C(=N\OC\C=C/Cl)\CC)C(=O)C1)O	20.2	EC50	0	Training set
82-66-6	O=C(C(c1ccccc1)c2ccccc2)C3C(=O)c4ccccc4C3=O	1.8	EC50	1	Training set
118-41-2	COc1cc(cc(OC)c1OC)C(=O)O	5200	EC50	0	Training set
723-46-6	Cc1onc(NS(=O)(=O)c2ccc(N)cc2)c1	205.2	EC50	0	Training set
37764-25-3	ClC(Cl)C(=O)N(CC=C)CC=C	141	EC50	0	Training set
33629-47-9	CCC(C)Nc1c(cc(cc1[N+](=O)[O-])C(C)(C)C)[N+](=O)[O-]	1	EC50	1	Training set
109-69-3	CCCCCl	3020	EC50	0	Training set
58-89-9	ClC1C(Cl)C(Cl)C(Cl)C(Cl)C1Cl	0.516	EC50	1	Training set
128-03-0	CN(C)C(=S)S	0.34	EC50	1	Training set
58842-20-9	[O-][N+](=O)\C=C\1/NCCCS1	33.85	EC50	0	Training set
120-94-5	CN1CCCC1	5000	EC50	0	Training set
135410-20-7	CN(Cc1ccc(Cl)nc1)C(=NC#N)C	50	EC50	0	Training set
56073-10-0	OC1=C(C2CC(Cc3ccccc23)c4ccc(cc4)c5ccc(Br)cc5)C(=O)Oc6ccccc16	0.98	EC50	1	Training set
82657-04-3	Cc1c(COC(=O)C2C(\C=C(/Cl)\C(F)(F)F)C2(C)C)cccc1c3ccccc3	0.0016	EC50	1	Training set
81335-37-7	CC(C)C1(C)N=C(NC1=O)c2nc3ccccc3cc2C(=O)O	280	EC50	0	Training set
4437-85-8	CCC1COC(=O)O1	905.4	EC50	0	Training set
181274-17-9	COC1=NN(C(=O)NS(=O)(=O)c2ccccc2OC(F)(F)F)C(=O)N1C	109	EC50	0	Training set
8001-35-2	ClCC1(CCl)C(=C)C2(Cl)C(Cl)C(Cl)C1(Cl)C2(Cl)Cl	0.01	EC50	1	Training set
50-29-3	Clc1ccc(cc1)C(c2ccc(Cl)cc2)C(Cl)(Cl)Cl	0.00108	EC50	1	Training set
91-20-3	c1ccc2ccccc2c1	4.72951	EC50	1	Training set
25954-13-6	CCOP(=O)(O)C(=O)N	100	EC50	0	Training set
131807-57-3	CC1(OC(=O)N(Nc2ccccc2)C1=O)c3ccc(Oc4ccccc4)cc3	0.0118	EC50	1	Training set
138261-41-3	[O-][N+](=O)NC1=NCCN1Cc2ccc(Cl)nc2	6.029	EC50	1	Training set
616-72-8	Cc1cc(C)c(cc1[N+](=O)[O-])[N+](=O)[O-]	24.3	EC50	0	Training set
874967-67-6	Cn1cc(C(=O)Nc2ccccc2C3CC3C4CC4)c(n1)C(F)F	5.96	EC50	1	Training set
119-06-2	CCCCCCCCCCCCCOC(=O)c1ccccc1C(=O)OCCCCCCCCCCCCC	0.05	EC50	1	Training set
1194-65-6	Clc1cccc(Cl)c1C#N	10	EC50	1	Training set
104-94-9	COc1ccc(N)cc1	0.18	EC50	1	Training set
121552-61-2	Cc1cc(nc(Nc2ccccc2)n1)C3CC3	0.032	EC50	1	Training set
84087-01-4	OC(=O)c1c(Cl)ccc2cc(Cl)cnc12	29.8	EC50	0	Training set
107-10-8	CCCN	100	EC50	0	Training set
50-28-2	C[C@]12CC[C@H]3[C@@H](CCc4cc(O)ccc34)[C@@H]1CC[C@@H]2O	2.87	EC50	1	Training set
105-60-2	O=C1CCCCCN1	2430	EC50	0	Training set
79241-46-6	CCCCOC(=O)[C@@H](C)Oc1ccc(Oc2ccc(cn2)C(F)(F)F)cc1	412.4	EC50	0	Training set
10222-01-2	NC(=O)C(Br)(Br)C#N	0.86	EC50	1	Training set
372137-35-4	CC(C)N(C)S(=O)(=O)NC(=O)c1cc(N2C(=O)C=C(N(C)C2=O)C(F)(F)F)c(F)cc1Cl	98.2	EC50	0	Training set
111991-09-4	COc1cc(OC)nc(NC(=O)NS(=O)(=O)c2ncccc2C(=O)N(C)C)n1	1000	EC50	0	Training set
118-44-5	CCNc1cccc2ccccc12	0.7	EC50	1	Training set
82697-71-0	CCC1=C(C(=O)O)C(=O)C=NN1c2ccc(Cl)cc2	5400	EC50	0	Training set
78-92-2	CCC(C)O	4227	EC50	0	Training set
69-72-7	OC(=O)c1ccccc1O	870	EC50	0	Training set
5395-50-6	OCN1C2C(N(CO)C(=O)N2CO)N(CO)C1=O	100	EC50	0	Training set
646-06-0	C1COCO1	6950	EC50	0	Training set
36734-19-7	CC(C)NC(=O)N1CC(=O)N(C1=O)c2cc(Cl)cc(Cl)c2	0.24	EC50	1	Training set
104-55-2	O=C\C=C\c1ccccc1	7.05	EC50	1	Training set
1886-81-3	CCCCCCCCCCCCOS(=O)(=O)c1ccccc1	23.4	EC50	0	Training set
71-36-3	CCCCO	1983	EC50	0	Training set
96-13-9	OCC(Br)CBr	338	EC50	0	Training set
135158-54-2	CSC(=O)c1cccc2nnsc12	2.9	EC50	1	Training set
15627-09-5	[O-][N-][N+](=O)C1CCCCC1	1.1	EC50	1	Training set
38260-54-7	CCOc1cc(OP(=S)(OC)OC)nc(CC)n1	0.0022	EC50	1	Training set
2517-43-3	COC(C)CCO	1000	EC50	0	Training set
82558-50-7	CCC(C)(CC)c1cc(NC(=O)c2c(OC)cccc2OC)on1	1.3	EC50	1	Training set
330-55-2	CON(C)C(=O)Nc1ccc(Cl)c(Cl)c1	0.12	EC50	1	Training set
86-73-7	C1c2ccccc2c3ccccc13	0.43	EC50	1	Training set
79-57-2	CN(C)[C@H]1[C@@H]2[C@@H](O)[C@H]3C(C(=O)c4c(O)cccc4[C@@]3(C)O)C(=O)[C@]2(O)C(=C(C(=O)N)C1=O)O	669	EC50	0	Training set
59669-26-0	CS\C(=N\OC(=O)N(C)SN(C)C(=O)O\N=C(/C)\SC)\C	0.027	EC50	1	Training set
99300-78-4	COc1ccc(cc1)C(CN(C)C)C2(O)CCCCC2	141.28	EC50	0	Training set
109-73-9	CCCCN	100	EC50	0	Training set
67-63-0	CC(C)O	10100	EC50	0	Training set
3739-38-6	OC(=O)c1cccc(Oc2ccccc2)c1	0.05	EC50	1	Training set
102-81-8	CCCCN(CCO)CCCC	73.7	EC50	0	Training set
2869-34-3	CCCCCCCCCCCCCN	0.015	EC50	1	Training set
42835-25-6	CC1CCc2cc(F)cc3C(=O)C(=CN1c23)C(=O)O	59	EC50	0	Training set
288-88-0	c1nc[nH]n1	98.1	EC50	0	Training set
33820-53-0	CCCN(CCC)c1c(cc(cc1[N+](=O)[O-])C(C)C)[N+](=O)[O-]	0.03	EC50	1	Training set
71-55-6	CC(Cl)(Cl)Cl	11.2	EC50	0	Training set
56-95-1	Clc1ccc(NC(=N)NC(=N)NCCCCCCNC(=N)NC(=N)Nc2ccc(Cl)cc2)cc1	0.063	EC50	1	Training set
657-24-9	CN(C)C(=N)N=C(N)N	64	EC50	0	Training set
3244-90-4	CCCOP(=S)(OCCC)OP(=S)(OCCC)OCCC	0.0024	EC50	1	Training set
153719-23-4	CN1COCN(Cc2cnc(Cl)s2)/C/1=N/[N+](=O)[O-]	106	EC50	0	Training set
123-30-8	Nc1ccc(O)cc1	0.24	EC50	1	Training set
50-78-2	CC(=O)Oc1ccccc1C(=O)O	88.1	EC50	0	Training set
52-51-7	OCC(Br)(CO)[N+](=O)[O-]	1.6	EC50	1	Training set
111988-49-9	Clc1ccc(CN2CCSC2=NC#N)cn1	22.52	EC50	0	Training set
77-06-5	CC12[C@@H](O)C=C[C@@]3(OC1=O)[C@@H]4CC[C@]5(O)C[C@]4(CC5=C)[C@H]([C@H]23)C(=O)O	143	EC50	0	Training set
93-07-2	COc1ccc(cc1OC)C(=O)O	1820	EC50	0	Training set
99-76-3	COC(=O)c1ccc(O)cc1	41.1	EC50	0	Training set
7212-44-4	CC(=CCC\C(=C\CCC(C)(O)C=C)\C)C	2.2	EC50	1	Training set
20018-09-1	Cc1ccc(cc1)S(=O)(=O)C(I)I	0.071	EC50	1	Training set
148-79-8	c1ccc2[nH]c(nc2c1)c3cscn3	0.31	EC50	1	Training set
1192-52-5	ClC1=C(Cl)C(=O)SS1	0.011	EC50	1	Training set
91125-43-8	CCCCCCCCC(=O)Oc1ccccc1S(=O)(=O)O	1000	EC50	0	Training set
179101-81-6	FC(F)(F)c1ccc(OCCCOc2c(Cl)cc(OCC=C(Cl)Cl)cc2Cl)nc1	0.0042	EC50	1	Training set
56296-78-7	CNCCC(Oc1ccc(cc1)C(F)(F)F)c2ccccc2	5.91	EC50	1	Training set
112226-61-6	CC(C)(C)N(NC(=O)c1ccc(Cl)cc1)C(=O)c2ccccc2	3.6	EC50	1	Training set
3689-24-5	CCOP(=S)(OCC)OP(=S)(OCC)OCC	0.0025	EC50	1	Training set
110-65-6	OCC#CCO	30.2	EC50	0	Training set
32289-58-0	CCCCCCN=C(N)N=C(N)N	0.18	EC50	1	Training set
122-66-7	N(Nc1ccccc1)c2ccccc2	2.18	EC50	1	Training set
2528-36-1	CCCCOP(=O)(OCCCC)Oc1ccccc1	0.36	EC50	1	Training set
175013-18-0	CON(C(=O)OC)c1ccccc1COc2ccn(n2)c3ccc(Cl)cc3	0.0157	EC50	1	Training set
7758-19-2	OCl=O	0.025	EC50	1	Training set
131860-33-8	CO\C=C(\C(=O)OC)/c1ccccc1Oc2cc(Oc3ccccc3C#N)ncn2	0.259	EC50	1	Training set
3218-02-8	NCC1CCCCC1	24.2	EC50	0	Training set
8003-34-7	COC(=O)C(=CC1C(C(=O)OC2CC(=O)C(=C2C)CC=CC=C)C1(C)C)C	0.0116	EC50	1	Training set
504-24-5	Nc1ccncc1	3.2	EC50	1	Training set
95737-68-1	CC(COc1ccc(Oc2ccccc2)cc1)Oc3ccccn3	0.4	EC50	1	Training set
85264-33-1	Cc1cc(C)n(CO)n1	31.7	EC50	0	Training set
87-61-6	Clc1cccc(Cl)c1Cl	1.45158	EC50	1	Training set
5234-68-4	CC1=C(SCCO1)C(=O)Nc2ccccc2	57	EC50	0	Training set
4719-04-4	OCCN1CN(CCO)CN(CCO)C1	26.1	EC50	0	Training set
86479-06-3	FC(F)C(F)(F)Oc1c(Cl)cc(NC(=O)NC(=O)c2c(F)cccc2F)cc1Cl	0.000111	EC50	1	Training set
994-05-8	CCC(C)(C)OC	100	EC50	0	Training set
91-65-6	CCN(CC)C1CCCCC1	5.76	EC50	1	Training set
18172-67-3	CC1(C)[C@H]2CCC(=C)[C@@H]1C2	1.25	EC50	1	Training set
15165-67-0	C[C@@H](Oc1ccc(Cl)cc1Cl)C(=O)O	100	EC50	0	Training set
60-00-4	OC(=O)CN(CCN(CC(=O)O)CC(=O)O)CC(=O)O	113	EC50	0	Training set
2597-03-7	CCOC(=O)C(SP(=S)(OC)OC)c1ccccc1	0.0019	EC50	1	Training set
81-61-8	Oc1ccc2C(=O)c3c(O)ccc(O)c3C(=O)c2c1O	0.186516	EC50	1	Training set
57-24-9	O=C1C[C@@H]2OCC=C3CN4CC[C@@]56[C@@H]4C[C@@H]3[C@@H]2[C@@H]5N1c7ccccc67	10	EC50	1	Training set
110488-70-5	COc1ccc(cc1OC)\C(=C/C(=O)N2CCOCC2)\c3ccc(Cl)cc3	10.6	EC50	0	Training set
23103-98-2	CN(C)C(=O)Oc1nc(nc(C)c1C)N(C)C	0.0065	EC50	1	Training set
1014-69-3	CNc1nc(NC(C)C)nc(SC)n1	26	EC50	0	Training set
645-08-9	COc1ccc(cc1O)C(=O)O	1130	EC50	0	Training set
145701-21-9	CCOc1nc(F)cc2nc(nn12)S(=O)(=O)Nc3c(Cl)cccc3Cl	72	EC50	0	Training set
104-51-8	CCCCc1ccccc1	0.45	EC50	1	Training set
828-00-2	CC1CC(OC(=O)C)OC(C)O1	24	EC50	0	Training set
355-80-6	OCC(F)(F)C(F)(F)C(F)(F)C(F)F	283.592	EC50	0	Training set
2058-46-0	CN(C)[C@H]1[C@@H]2[C@@H](O)[C@H]3C(=C(O)[C@]2(O)C(=C(C(=O)N)C1=O)O)C(=O)c4c(O)cccc4[C@@]3(C)O	250	EC50	0	Training set
124495-18-7	Fc1ccc(Oc2ccnc3cc(Cl)cc(Cl)c23)cc1	0.091	EC50	1	Training set
92-52-4	c1ccc(cc1)c2ccccc2	0.73	EC50	1	Training set
98-01-1	O=Cc1occc1	20.4	EC50	0	Training set
79-06-1	NC(=O)C=C	98	EC50	0	Training set
487-54-7	OC(=O)CNC(=O)c1ccccc1O	1800	EC50	0	Training set
118-96-7	Cc1c(cc(cc1[N+](=O)[O-])[N+](=O)[O-])[N+](=O)[O-]	15	EC50	0	Training set
5464-71-1	CCCCCCCCOC(=O)C(C)O	45	EC50	0	Training set
841-06-5	COCCCNc1nc(NC(C)C)nc(SC)n1	42	EC50	0	Training set
141-66-2	COP(=O)(OC)O\C(=C\C(=O)N(C)C)\C	0.0127	EC50	1	Training set
133-06-2	ClC(Cl)(Cl)SN1C(=O)C2CC=CCC2C1=O	7.1	EC50	1	Training set
110-15-6	OC(=O)CCC(=O)O	374.2	EC50	0	Training set
7747-35-5	CCC12COCN1COC2	42	EC50	0	Training set
882-09-7	CC(C)(Oc1ccc(Cl)cc1)C(=O)O	200	EC50	0	Training set
525-79-1	C(Nc1[nH]cnc2ncnc12)c3occc3	0.64	EC50	1	Training set
78-83-1	CC(C)CO	1111.82	EC50	0	Training set
576-24-9	Oc1cccc(Cl)c1Cl	3.1	EC50	1	Training set
62476-59-9	OC(=O)c1cc(Oc2ccc(cc2Cl)C(F)(F)F)ccc1[N+](=O)[O-]	28.1	EC50	0	Training set
57-14-7	CN(C)N	27.66	EC50	0	Training set
14698-29-4	CCN1C=C(C(=O)O)C(=O)c2cc3OCOc3cc12	4.6	EC50	1	Training set
24579-73-5	CCCOC(=O)NCCCN(C)C	106	EC50	0	Training set
112-05-0	CCCCCCCCC(=O)O	96	EC50	0	Training set
577-11-7	CCCCC(CC)COC(=O)CC(C(=O)OCC(CC)CCCC)S(=O)(=O)O	43	EC50	0	Training set
150114-71-9	Nc1cc(Cl)nc(C(=O)O)c1Cl	98.6	EC50	0	Training set
139-40-2	CC(C)Nc1nc(Cl)nc(NC(C)C)n1	5.32	EC50	1	Training set
120928-09-8	CC(C)(C)c1ccc(CCOc2ncnc3ccccc23)cc1	0.0056	EC50	1	Training set
96182-53-5	CCOP(=S)(OC(C)C)Oc1cnc(nc1)C(C)(C)C	7.8e-05	EC50	1	Training set
126833-17-8	CC1(CCCCC1)C(=O)Nc2ccc(O)c(Cl)c2Cl	18.8	EC50	0	Training set
110-83-8	C1CCC=CC1	5.3	EC50	1	Training set
63333-35-7	CN(c1c(Br)cc(Br)cc1Br)c2c(cc(cc2C(F)(F)F)[N+](=O)[O-])[N+](=O)[O-]	0.00198	EC50	1	Training set
2921-88-2	CCOP(=S)(OCC)Oc1nc(Cl)c(Cl)cc1Cl	3.24e-05	EC50	1	Training set
15972-60-8	CCc1cccc(CC)c1N(COC)C(=O)CCl	7.7	EC50	1	Training set
26159-34-2	COc1ccc2cc(ccc2c1)[C@H](C)C(=O)O	166.3	EC50	0	Training set
141-82-2	OC(=O)CC(=O)O	275	EC50	0	Training set
5137-55-3	CCCCCCCC[N+](C)(CCCCCCCC)CCCCCCCC	0.0413	EC50	1	Training set
163269-30-5	O=S1CCON=C1c2cc3ccccc3s2	0.422	EC50	1	Training set
2593-15-9	CCOc1nc(ns1)C(Cl)(Cl)Cl	4.9	EC50	1	Training set
123312-89-0	CC1=NNC(=O)N(C1)\N=C\c2cccnc2	87	EC50	0	Training set
81335-77-5	CCc1cnc(C2=NC(=O)C(C)(N2)C(C)C)c(c1)C(=O)O	110	EC50	0	Training set
127-18-4	ClC(=C(Cl)Cl)Cl	8.5	EC50	1	Training set
76-06-2	[O-][N+](=O)C(Cl)(Cl)Cl	0.17	EC50	1	Training set
504-63-2	OCCCO	7417	EC50	0	Training set
121-82-4	[O-][N+](=O)N1CN(CN(C1)[N+](=O)[O-])[N+](=O)[O-]	100	EC50	0	Training set
15263-52-2	CN(C)C(CSC(=O)N)CSC(=O)N	2.8294	EC50	1	Training set
213464-77-8	COc1cc(OC)nc(NC(=O)NS(=O)(=O)Nc2ccccc2C(=O)N(C)C)n1	97.3	EC50	0	Training set
768-94-5	NC12CC3CC(CC(C3)C1)C2	22.1	EC50	0	Training set
298-07-7	CCCCC(CC)COP(=O)(O)OCC(CC)CCCC	83.7	EC50	0	Training set
120-36-5	CC(Oc1ccc(Cl)cc1Cl)C(=O)O	5.4	EC50	1	Training set
74222-97-2	COC(=O)c1ccccc1S(=O)(=O)NC(=O)Nc2nc(C)cc(C)n2	12.5	EC50	0	Training set
127-79-7	Cc1ccnc(NS(=O)(=O)c2ccc(N)cc2)n1	277	EC50	0	Training set
88671-89-0	CCCCC(Cn1cncn1)(C#N)c2ccc(Cl)cc2	11	EC50	0	Training set
43210-67-9	COC(=O)Nc1nc2cc(Sc3ccccc3)ccc2[nH]1	0.0167	EC50	1	Training set
23950-58-5	CC(C)(NC(=O)c1cc(Cl)cc(Cl)c1)C#C	5.6	EC50	1	Training set
143-50-0	ClC1(Cl)C2(Cl)C3(Cl)C4(Cl)C(=O)C5(Cl)C(Cl)(C1(Cl)C35Cl)C24Cl	0.12	EC50	1	Training set
4920-77-8	Cc1cccc(O)c1[N+](=O)[O-]	18.8	EC50	0	Training set
2050-68-2	Clc1ccc(cc1)c2ccc(Cl)cc2	0.446196	EC50	1	Training set
158062-67-0	FC(F)(F)c1ccncc1C(=O)NCC#N	98.6	EC50	0	Training set
134-62-3	CCN(CC)C(=O)c1cccc(C)c1	75	EC50	0	Training set
149877-41-8	COc1ccc(cc1NNC(=O)OC(C)C)c2ccccc2	0.5	EC50	1	Training set
102-82-9	CCCCN(CCCC)CCCC	8	EC50	1	Training set
67233-85-6	COc1ccc(cc1O)[N+](=O)[O-]	26.1	EC50	0	Training set
283594-90-1	Cc1cc(C)c(C2=C(OC(=O)CC(C)(C)C)C3(CCCC3)OC2=O)c(C)c1	0.0923	EC50	1	Training set
375-22-4	OC(=O)C(F)(F)C(F)(F)C(F)(F)F	4280.76	EC50	0	Training set
85-00-7	C1C[n+]2ccccc2c3cccc[n+]13	0.77	EC50	1	Training set
1825-21-4	COc1c(Cl)c(Cl)c(Cl)c(Cl)c1Cl	0.0272	EC50	1	Training set
21725-46-2	CCNc1nc(Cl)nc(NC(C)(C)C#N)n1	35.5	EC50	0	Training set
10605-21-7	COC(=O)Nc1nc2ccccc2[nH]1	0.02	EC50	1	Training set
123-03-5	CCCCCCCCCCCCCCCC[n+]1ccccc1	0.00736	EC50	1	Training set
98967-40-9	Cc1ccn2nc(nc2n1)S(=O)(=O)Nc3c(F)cccc3F	254	EC50	0	Training set
5259-88-1	CC1=C(C(=O)Nc2ccccc2)S(=O)(=O)CCO1	69.1	EC50	0	Training set
22781-23-3	CNC(=O)Oc1cccc2OC(C)(C)Oc12	0.0292	EC50	1	Training set
589-16-2	CCc1ccc(N)cc1	2	EC50	1	Training set
13343-98-1	CCCCOCCOC	1000	EC50	0	Training set
7681-52-9	OCl	0.04	EC50	1	Training set
131341-86-1	FC1(F)Oc2cccc(c2O1)c3c[nH]cc3C#N	0.9	EC50	1	Training set
10004-44-1	CC1=CC(=O)NO1	30.8	EC50	0	Training set
1918-00-9	COc1c(Cl)ccc(Cl)c1C(=O)O	100	EC50	0	Training set
272451-65-7	Cc1cc(ccc1NC(=O)c2cccc(I)c2C(=O)NC(C)(C)CS(=O)(=O)C)C(F)(C(F)(F)F)C(F)(F)F	0.0548	EC50	1	Training set
51384-51-1	COCCc1ccc(OCC(O)CNC(C)C)cc1	100	EC50	0	Training set
115-32-2	OC(c1ccc(Cl)cc1)(c2ccc(Cl)cc2)C(Cl)(Cl)Cl	0.2	EC50	1	Training set
42399-41-7	COc1ccc(cc1)[C@@H]2Sc3ccccc3N(CCN(C)C)C(=O)[C@@H]2OC(=O)C	28	EC50	0	Training set
1085-98-9	CN(C)S(=O)(=O)N(SC(F)(Cl)Cl)c1ccccc1	1.05	EC50	1	Training set
542-75-6	ClC\C=C/Cl	0.09	EC50	1	Training set
72-14-0	Nc1ccc(cc1)S(=O)(=O)Nc2nccs2	23	EC50	0	Training set
214710-34-6	CCCCCCCCCCNCCCCCCCCCC	0.39	EC50	1	Training set
41859-67-0	CC(C)(Oc1ccc(CCNC(=O)c2ccc(Cl)cc2)cc1)C(=O)O	240.4	EC50	0	Training set
79622-59-6	[O-][N+](=O)c1cc(c(Cl)c(c1Nc2ncc(cc2Cl)C(F)(F)F)[N+](=O)[O-])C(F)(F)F	0.18	EC50	1	Training set
67564-91-4	CC(CN1C[C@@H](C)O[C@@H](C)C1)Cc2ccc(cc2)C(C)(C)C	2.38	EC50	1	Training set
99-96-7	OC(=O)c1ccc(O)cc1	1690	EC50	0	Training set
592-41-6	CCCCC=C	60	EC50	0	Training set
81103-11-9	CC[C@H]1OC(=O)[C@H](C)[C@@H](O[C@H]2C[C@@](C)(OC)[C@@H](O)[C@H](C)O2)[C@H](C)[C@@H](O[C@@H]3O[C@H](C)C[C@@H]([C@H]3O)N(C)C)[C@@](C)(C[C@@H](C)C(=O)[C@H](C)[C@@H](O)[C@]1(C)O)OC	8.16	EC50	1	Training set
93-04-9	COc1ccc2ccccc2c1	4.04	EC50	1	Training set
3073-66-3	CC1CCCC(C)(C)C1	1.1	EC50	1	Training set
140-57-8	CC(COc1ccc(cc1)C(C)(C)C)OS(=O)OCCCl	0.16	EC50	1	Training set
510-15-6	CCOC(=O)C(O)(c1ccc(Cl)cc1)c2ccc(Cl)cc2	0.87	EC50	1	Training set
72-43-5	COc1ccc(cc1)C(c2ccc(OC)cc2)C(Cl)(Cl)Cl	0.005	EC50	1	Training set
95-73-8	Cc1ccc(Cl)cc1Cl	1.01448	EC50	1	Test set
78587-05-0	C[C@H]1C(SC(=O)N1C(=O)NC2CCCCC2)c3ccc(Cl)cc3	0.742	EC50	1	Training set
98-82-8	CC(C)c1ccccc1	7.4	EC50	1	Training set
931-53-3	[C-]#[N+]C1CCCCC1	2.28	EC50	1	Training set
117-81-7	CCCCC(CC)COC(=O)c1ccccc1C(=O)OCC(CC)CCCC	0.133	EC50	1	Training set
2317-24-0	CCCCOCC(C)OC(=O)C(C)Oc1cc(Cl)c(Cl)cc1Cl	2.4	EC50	1	Training set
613-31-0	C1c2ccccc2Cc3ccccc13	0.56	EC50	1	Training set
24565-13-7	CCNc1nc(Nc2ccccc2)nc(Nc3ccc(\C=C\c4ccc(Nc5nc(NCC)nc(Nc6ccccc6)n5)cc4S(=O)(=O)O)c(c3)S(=O)(=O)O)n1	38.35	EC50	0	Training set
66357-35-5	CN\C(=C/[N+](=O)[O-])\NCCSCc1oc(CN(C)C)cc1	100	EC50	0	Training set
13532-18-8	COC(=O)CCSC	3.16	EC50	1	Training set
1330-20-7	Cc1cccc(C)c1	90	EC50	0	Training set
75-99-0	CC(Cl)(Cl)C(=O)O	16	EC50	0	Training set
68694-11-1	CCCOCC(=Nc1ccc(Cl)cc1C(F)(F)F)n2ccnc2	1.4	EC50	1	Training set
42200-33-9	CC(C)(C)NCC(O)COc1cccc2C[C@@H](O)[C@@H](O)Cc12	163.4	EC50	0	Training set
54-11-5	CN1CCC[C@H]1c2cccnc2	0.242	EC50	1	Training set
10548-10-4	CCOP(=S)(OCC)SCS(=O)C(C)(C)C	0.000489	EC50	1	Training set
1320-18-9	CCCCOCCCOC(=O)COc1ccc(Cl)cc1Cl	0.42	EC50	1	Training set
4316-42-1	CCCCn1ccnc1	6.573	EC50	1	Test set
447-53-0	C1Cc2ccccc2C=C1	4.3	EC50	1	Training set
9004-32-4	OCC(O)C(O)C(O)C(O)C=O	87.26	EC50	0	Training set
143-18-0	CCCCCCCC\C=C/CCCCCCCC(=O)O	0.57	EC50	1	Training set
544-77-4	CCCCCCCCCCCCCCCCI	0.219	EC50	1	Test set
68585-47-7	CCCCCCCCCCCCCOS(=O)(=O)O	1.37	EC50	1	Training set
529-69-1	Nc1nc(O)c2ncc(O)nc2n1	2.97	EC50	1	Training set
126-22-7	CCCC(=O)OC(C(Cl)(Cl)Cl)P(=O)(OC)OC	0.006	EC50	1	Training set
4170-30-3	C\C=C/C=O	2	EC50	1	Test set
34825-93-9	BrCC1CCCC=C1	12	EC50	0	Training set
493-09-4	C1COc2ccccc2O1	28.6	EC50	0	Test set
66728-50-5	COCCOC(C)(C)C	4780	EC50	0	Training set
85-34-7	Clc1ccc(Cl)c(CC=O)c1Cl	4.5	EC50	1	Test set
5407-87-4	Cc1cc(C)nc(N)c1	9.19	EC50	1	Training set
37677-17-1	BrCC1=CCCCC1	13.4	EC50	0	Training set
143-08-8	CCCCCCCCCO	360.635	EC50	0	Training set
609-19-8	Oc1cc(Cl)c(Cl)c(Cl)c1	0.4	EC50	1	Training set
122-42-9	CC(C)OC(=O)Nc1ccccc1	8.1	EC50	1	Training set
475-20-7	CC1(C)CCCC2(C)C3CCC(C13)C2=C	0.08	EC50	1	Training set
19078-35-4	CC1CCC23C(C)CCC(CC12)C3(C)C	0.035	EC50	1	Test set
473-55-2	CC1CCC2CC1C2(C)C	3.354	EC50	1	Training set
1646-87-3	CNC(=O)O\N=C\C(C)(C)S(=O)C	0.057	EC50	1	Training set
541-28-6	CC(C)CCI	2.658	EC50	1	Training set
50-44-2	Sc1[nH]cnc2ncnc12	54.5	EC50	0	Training set
294-62-2	C1CCCCCCCCCCC1	21	EC50	0	Training set
56070-16-7	CCOP(=S)(OCC)SCS(=O)(=O)C(C)(C)C	0.000324	EC50	1	Test set
32273-77-1	CC1CCC2CCCC12	6.961	EC50	1	Training set
581-42-0	Cc1ccc2cc(C)ccc2c1	0.193	EC50	1	Training set
76-44-8	ClC1C=CC2C1C3(Cl)C(=C(Cl)C2(Cl)C3(Cl)Cl)Cl	0.047	EC50	1	Training set
513-48-4	CCC(C)I	10.933	EC50	0	Training set
29587-92-6	C1CCCCC2OC2CCC1	37.9	EC50	0	Training set
82419-36-1	CC1COc2c(N3CCN(C)CC3)c(F)cc4C(=O)C(=CN1c24)C(=O)O	3.13	EC50	1	Test set
64628-44-0	FC(F)(F)Oc1ccc(NC(=O)NC(=O)c2ccccc2Cl)cc1	0.00021	EC50	1	Training set
112-52-7	CCCCCCCCCCCCCl	0.013	EC50	1	Training set
128-37-0	Cc1cc(c(O)c(c1)C(C)(C)C)C(C)(C)C	1.44	EC50	1	Test set
101-20-2	Clc1ccc(NC(=O)Nc2ccc(Cl)c(Cl)c2)cc1	0.0031	EC50	1	Training set
1319-77-3	Cc1ccc(O)cc1	7	EC50	1	Training set
29812-79-1	CCCCCCCCCCON	0.076	EC50	1	Training set
575-41-7	Cc1cc(C)c2ccccc2c1	1.28	EC50	1	Training set
68584-22-5	CCCCCCCCCC(CC)c1ccc(cc1)S(=O)(=O)O	5.65	EC50	1	Test set
9004-82-4	CCCCCCCCCCCCOCCOS(=O)(=O)O	3.12	EC50	1	Training set
558-17-8	CC(C)(C)I	0.41	EC50	1	Training set
6876-23-9	C[C@H]1CCCC[C@@H]1C	4.867	EC50	1	Training set
693-58-3	CCCCCCCCCBr	0.541	EC50	1	Training set
43121-43-3	CC(C)(C)C(=O)C(Oc1ccc(Cl)cc1)n2cncn2	20.5626	EC50	0	Training set
73851-70-4	CN\C(=C/[N+](=O)[O-])\NCCS(=O)Cc1oc(CN(C)C)cc1	7.85	EC50	1	Test set
27344-41-8	OS(=O)(=O)c1ccccc1\C=C/c2ccc(cc2)c3ccc(\C=C/c4ccccc4S(=O)(=O)O)cc3	40.33	EC50	0	Training set
275-51-4	c1ccc2cccc2cc1	1.6	EC50	1	Training set
584-79-2	CC(=CC1C(C(=O)OC2CC(=O)C(=C2C)CC=C)C1(C)C)C	0.021	EC50	1	Training set
78-87-5	CC(Cl)CCl	13.5583	EC50	0	Test set
13863-31-5	CN(CCO)c1nc(Nc2ccccc2)nc(Nc3ccc(\C=C\c4ccc(Nc5nc(Nc6ccccc6)nc(n5)N(C)CCO)cc4S(=O)(=O)O)c(c3)S(=O)(=O)O)n1	42.51	EC50	0	Training set
6452-73-9	CC(C)NCC(O)COc1ccccc1OCC=C	10.1	EC50	0	Test set
626-62-0	IC1CCCCC1	7.047	EC50	1	Test set
2702-72-9	CC(=O)Oc1ccc(Cl)cc1Cl	530	EC50	0	Test set
2040-96-2	CCCC1CCCC1	3.113	EC50	1	Test set
1008-80-6	CC1CC2CCCCC2CC1C	0.04	EC50	1	Training set
1137-12-8	CC1(C)CCC[C@@]2(C)[C@@H]3CC4C([C@H]13)C24C	0.065	EC50	1	Training set
68-04-2	OC(=O)CC(O)(CC(=O)O)C(=O)O	735.54	EC50	0	Training set
776-35-2	C1Cc2ccccc2c3ccccc13	0.42	EC50	1	Training set
2395-96-2	COc1c2ccccc2cc3ccccc13	0.395	EC50	1	Training set
634-66-2	Clc1ccc(Cl)c(Cl)c1Cl	0.129535	EC50	1	Training set
112-29-8	CCCCCCCCCCBr	0.284	EC50	1	Test set
2668-24-8	COc1cc(Cl)c(Cl)c(Cl)c1O	5.9	EC50	1	Training set
111-70-6	CCCCCCCO	6.15865	EC50	1	Training set
508-32-7	CC1(C)C2CC3C(C2)C13C	1.4	EC50	1	Test set
279-23-2	C1CC2CCC1C2	5.2	EC50	1	Training set
469-61-4	C[C@@H]1CC[C@H]2C(C)(C)C3C[C@@]12CC=C3C	0.044	EC50	1	Training set
60018-95-3	CC1(C)C(C=C(Cl)Cl)C1C(=O)OCc2cccc(Oc3ccccc3)c2	0.00012	EC50	1	Training set
26248-24-8	CCCCCCCCCCCCCc1ccc(cc1)S(=O)(=O)O	3.24	EC50	1	Training set
110-80-5	CCOCCO	1892.54	EC50	0	Test set
39765-80-5	ClC1C(Cl)C2C(C1Cl)C3(Cl)C(=C(Cl)C2(Cl)C3(Cl)Cl)Cl	0.0223	EC50	1	Training set
103-74-2	OCCc1ccccn1	13.82	EC50	0	Training set
613-12-7	Cc1ccc2cc3ccccc3cc2c1	0.096	EC50	1	Training set
309-00-2	ClC1=C(Cl)C2(Cl)C3C4CC(C=C4)C3C1(Cl)C2(Cl)Cl	0.032	EC50	1	Training set
89-82-7	C[C@@H]1CCC(=C(C)C)C(=O)C1	24.4	EC50	0	Training set
8065-48-3	CCOP(=O)(OCC)SCCSCC	0.014	EC50	1	Training set
108-40-7	Cc1cccc(S)c1	0.007	EC50	1	Training set
3296-50-2	C1CCC2CCCC2C1	3.701	EC50	1	Training set
111-42-2	OCCNCCO	72.92	EC50	0	Training set
20354-26-1	CN1C(=O)ON(C1=O)c2ccc(Cl)c(Cl)c2	1.3	EC50	1	Training set
55723-99-4	ClCC#CC1CCCCC1	1.572	EC50	1	Training set
34381-68-5	CCCC(=O)Nc1ccc(OCC(O)CNC(C)C)c(c1)C(=O)C	50.9	EC50	0	Training set
16090-02-1	OS(=O)(=O)c1cc(Nc2nc(Nc3ccccc3)nc(n2)N4CCOCC4)ccc1\C=C\c5ccc(Nc6nc(Nc7ccccc7)nc(n6)N8CCOCC8)cc5S(=O)(=O)O	6.85	EC50	1	Training set
616-45-5	O=C1CCCN1	13.21	EC50	0	Training set
2207-01-4	C[C@@H]1CCCC[C@@H]1C	3.235	EC50	1	Test set
7786-34-7	COC(=O)\C=C(/C)\OP(=O)(OC)OC	0.00016	EC50	1	Training set
56-23-5	ClC(Cl)(Cl)Cl	180.54	EC50	0	Training set
71-41-0	CCCCCO	52.8889	EC50	0	Test set
83121-18-0	Fc1cccc(F)c1C(=O)NC(=O)Nc2cc(Cl)c(F)c(Cl)c2F	0.00059	EC50	1	Training set
111-87-5	CCCCCCCCO	4.1673	EC50	1	Test set
77-73-6	C1C=CC2C3CC(C=C3)C12	4.2	EC50	1	Training set
106-43-4	Cc1ccc(Cl)cc1	1.64558	EC50	1	Training set

## Sheet: Validation
CAS	Canonical_Smiles	toxicity(PPM)	endpoint	biclass
91-23-6	OC(c(cccc1)c1)(c(cccc2)c2)C(O)(c(cccc3)c3)c(cccc4)c4	0.017	EC50	1
91-64-5	c(c(cccc1)c1)(cccc2c(cccc3)c3)c2	0.65	EC50	1
6165-51-1	c(c(c(cccc1)c1)ccc2)(c(cccc3)c3)c2	0.52	EC50	1
56-23-5	O=C(c(c(C=Cc1cccc2)ccc3)c3)c12	1.9	EC50	1
60-09-3	c21c(C(=O)NC1=O)ccc(c2)[N+](=O)[O-]	28	EC50	0
60-34-4	c12C(=O)N(CCCCBr)C(=O)c1cccc2	3.8	EC50	1
63-74-1	O=C(OC(=O)c1cccc2)c12	71	EC50	0
75-34-3	CCCCC(CC)CN3C(=O)C2C1CC(C=C1)C2C3(=O)	3.6	EC50	1
75-35-4	c1ccc2C(=O)C(Cl)=C(Cl)C(=O)c2c1	0.017	EC50	1
75-91-2	c1cc2C(=O)C=C(C)C(=O)c2cc1	0.22	EC50	1
76-13-1	n(c(c(ccc1)cc2)c1O)c2	1.7	EC50	1
77-47-4	c(c(ccc1N)ccc2)(c2)c1	0.84	EC50	1
78-59-1	O=C(O)c(c(O)cc(c1ccc2)c2)c1	33	EC50	0
78-87-5	c(c(c(cc1)Cl)ccc2)(c2)c1	0.73	EC50	1
79-10-7	CC(c1cccc2c1cccc2)C	0.15	EC50	1
79-14-1	Cc2ccc1cc(C)ccc1c2	2.5	EC50	1
79-20-9	Cc2ccc1ccccc1c2C	1.1	EC50	1
79-54-9	c(c(ccc1C)ccc2)(c2)c1	1.4	EC50	1
80-04-6	c(c(c(cc1)C)ccc2)(c2)c1	2.2	EC50	1
80-09-1	N(C(=CN1)C)=C1c(cccc2)c2	44	EC50	0
80-43-3	N#Cc(ccc(c(ccc(c1)CCCCCC)c1)c2)c2	0.0076	EC50	1
80-51-3	Nc(c(cc(c(ccc(N)c1Cl)c1)c2)Cl)c2	1.9	EC50	1
83-42-1	CCc2ccc(cc2)c1ccccc1	0.27	EC50	1
84-15-1	c(c(cccc1)c1)(cccc2)c2	1.4	EC50	1
84-69-5	N(Nc(cccc1)c1)c(cccc2)c2	1.1	EC50	1
88-09-5	N=C(Nc(cccc1)c1)Nc(cccc2)c2	8.1	EC50	1
88-19-7	N=C(Nc(c(ccc1)C)c1)Nc(c(ccc2)C)c2	7.2	EC50	1
89-40-7	O=C(Nc(ccc(c1)Cl)c1)Nc(ccc(c2Cl)Cl)c2	0.016	EC50	1
89-59-8	c1(c(cc(cc1)[N+](=O)[O-])[N+](=O)[O-])Cc2ccccn2	23	EC50	0
89-61-2	N(c(ccc(Nc(cccc1)c1)c2)c2)C(CC(C)C)C	0.23	EC50	1
89-83-8	N(c(cccc1)c1)c(cccc2)c2	1.5	EC50	1
90-02-8	O(c(ccc(N)c1)c1)c(ccc(N)c2)c2	0.99	EC50	1
90-30-2	Nc(c(cc(c1)Cc(ccc(N)c2Cl)c2)Cl)c1	0.92	EC50	1
90-60-8	O=C(c(cccc1)c1)c(c(O)cc(OC)c2)c2	1.9	EC50	1
91-15-6	Oc(ccc(c1)C(c(ccc(O)c2)c2)(C)C)c1	13	EC50	0
91-17-8	Oc(ccc(c1)C(c(cccc2)c2)(C)C)c1	1.7	EC50	1
91-76-9	c2(COCC=CCOCc1ccccc1)ccccc2	1.4	EC50	1
92-06-8	O(Cc(cccc1)c1)Cc(cccc2)c2	0.77	EC50	1
92-70-6	O(c(cccc1)c1)c(cccc2)c2	2	EC50	1
92-84-2	c(cccc1)(c1)C(CC(c(cccc2)c2)=C)(C)C	0.057	EC50	1
92-88-6	c(cccc1)(c1)C(c(c(ccc2C)C)c2)C	0.25	EC50	1
93-68-5	Brc2c(c(cc(c2)OCC1OC1)C)Br	1.3	EC50	1
93-83-4	O=C1N(CCOC(=O)C=C)C(=O)N(C(=O)N1CCOC(=O)C=C)CCOC(=O)C=C	87	EC50	0
95-08-9	c1nc(C#N)c(C#N)nc1	2.1	EC50	1
95-54-5	n(cccc1N)c1	7.1	EC50	1
95-70-5	n(c(ccc1)C=C)c1	9.5	EC50	1
95-78-3	n(ccc1)c(CCC2)c1C2	11	EC50	0
95-81-8	n(cccc1)c1	180	EC50	0
95-87-4	CC(C)OP(=O)(OC(C)C)SCc1ccccc1	0.86	EC50	1
96-76-4	O=C(Oc(c(ccc1)C(CC)C)c1)NC	0.014	EC50	1
99-54-7	CCc1cccc(CC)c1N(C(=O)CCl)CCOCCC	7	EC50	1
99-82-1	O=C(N(CC)CC)c(cccc1C)c1	74	EC50	0
99-93-4	Clc(c(Cl)c(Cl)c1C#N)c(Cl)c1C#N	0.3	EC50	1
99-94-5	c1(c(cc(cc1[N+](=O)[O-])[N+](=O)[O-])C(CC)C)OC	2.4	EC50	1
100-51-6	c1(c(c([N+](=O)[O-])ccc1)C)[N+](=O)[O-]	20	EC50	0
100-83-4	c1(cc(ccc1)[N+](=O)[O-])[N+](=O)[O-]	35	EC50	0
101-02-0	c1(cc(ccc1)OC)[N+](=O)[O-]	19	EC50	0
101-20-2	[O-][N+](=O)c1c(OC)cccc1	46	EC50	0
101-55-3	c1(cc(c(cc1)F)Cl)[N+](=O)[O-]	8.2	EC50	1
101-77-9	[O-][N+](=O)c1c(c(c(c(Cl)c1Cl)Cl)Cl)Cl	0.93	EC50	1
101-80-4	O=C(O)c(cc(O)c(O)c1O)c1	19.1	EC50	0
105-37-3	O=C(O)c(cc(O)cc1O)c1	616	EC50	0
105-53-3	O=C(O)c(c(O)ccc1O)c1	59.5	EC50	0
105-99-7	O=C(O)c(c(O)cc(O)c1)c1	120	EC50	0
106-41-2	O=C(O)c(ccc(O)c1OC)c1	908	EC50	0
106-50-3	O=C(O)c(cccc1O)c1	1550	EC50	0
106-89-8	O=C(O)c(ccc(O)c1)c1	140	EC50	0
106-91-2	O=C(O)c(ccc(c1)C)c1	42	EC50	0
107-03-9	O=C(C=CC(OC=C1)=C1)C	13	EC50	0
107-15-3	c1c(Cl)cccc1C=CC(=O)C	4.4	EC50	1
107-18-6	O=C(OCC(C)C)c(c(ccc1)C(=O)OCC(C)C)c1	6.7	EC50	1
108-39-4	O=Cc(c(cc(c1)C)C)c1C	4.5	EC50	1
108-91-8	c1(c(ccc(c1)Cl)N)[N+](=O)[O-]	4.2	EC50	1
108-98-5	O(CCN(c(c(OCC)cc(N)c1OCC)c1)C2)C2	18	EC50	0
109-64-8	N(c(cccc1)c1)C	4.6	EC50	1
109-89-7	O(c(ccc(N)c1)c1)C	4.1	EC50	1
110-00-9	Cc1ccc(Cl)c(N)c1	3.6	EC50	1
110-19-0	Nc(c(cc(c1)Cl)Cl)c1Cl	4.3	EC50	1
110-44-1	Nc(cc(cc1Cl)Cl)c1	1.2	EC50	1
110-81-6	Nc(c(ccc1Cl)Cl)c1	1.8	EC50	1
110-85-0	Nc(c(cc(c1)Cl)Cl)c1	4.2	EC50	1
110-86-1	Nc(ccc(c1)Cl)c1	0.31	EC50	1
110-91-8	Nc(cccc1Cl)c1	0.49	EC50	1
111-03-5	Nc(c(ccc1)Cl)c1	2	EC50	1
111-14-8	Nc1ccc(CCCCCCCC)cc1	0.03	EC50	1
111-15-9	CC(C)c1ccc(N)cc1	1.5	EC50	1
111-17-1	Nc(ccc(c1)CC)c1	1.9	EC50	1
111-27-3	Nc(c(ccc1)CC)c1	9.7	EC50	1
111-42-2	Nc(cc(cc1C)C)c1	2.2	EC50	1
111-44-4	Nc(c(ccc1C)C)c1	18	EC50	0
111-78-4	Nc(c(c(cc1)C)C)c1	8.9	EC50	1
111-82-0	Nc(ccc(c1)C)c1	1.3	EC50	1
111-85-3	Nc(c(ccc1)C)c1	16	EC50	0
111-88-6	NCc(cccc1CN)c1	15	EC50	0
111-91-1	N(c(ccc(NC(CC)C)c1)c1)C(CC)C	0.54	EC50	1
112-07-2	Nc(c(N)ccc1)c1	1.4	EC50	1
112-41-4	Nc(ccc(N)c1)c1	0.33	EC50	1
112-57-2	Nc(cccc1N)c1	2	EC50	1
112-70-9	c1(c(cccc1)O)[N+](=O)[O-]	28	EC50	0
115-96-8	O=Cc(c(O)c(cc1Cl)Cl)c1	1.4	EC50	1
117-84-0	O=Cc(cc(OC)c(O)c1OC)c1	42	EC50	0
118-69-4	Oc(c(c(c(c1Cl)Cl)Cl)Cl)c1Cl	0.11	EC50	1
119-65-3	Oc(c(cc(c1Cl)Cl)Cl)c1Cl	1.4	EC50	1
120-25-2	Oc(c(cc(c1Cl)Cl)Cl)c1	0.98	EC50	1
120-93-4	Oc(c(cc(c1)Cl)Cl)c1	2.2	EC50	1
121-33-5	Oc(ccc(c1)Br)c1	4.2	EC50	1
122-57-6	Oc(ccc(c1)Cl)c1	2.5	EC50	1
123-11-5	Oc(c(cc(c1)C(CC)(C)C)C(CC)(C)C)c1	0.12	EC50	1
123-35-3	Oc(c(cc(c1)C)C(C)(C)C)c1C(C)(C)C	0.84	EC50	1
124-04-9	Oc(ccc(c1)CCCCCCCC)c1	0.42	EC50	1
124-09-4	CCC(C)c1cccc(C(C)CC)c1O	0.083	EC50	1
124-28-7	Oc(c(cc(c1)C(C)(C)C)C(C)(C)C)c1	0.33	EC50	1
124-40-3	Oc(ccc(c1)CCCCC)c1	0.9	EC50	1
126-72-7	Oc(c(cc(c1)C)C(C)(C)C)c1	2.7	EC50	1
126-73-8	Oc(c(ccc1)C(C)(C)C)c1C	5.3	EC50	1
126-98-7	Oc(ccc(c1)C(CC)C)c1	3.1	EC50	1
127-27-5	Oc(c(ccc1C)C(C)C)c1	4.5	EC50	1
127-90-2	Oc(c(ccc1)C(CC)C)c1	4	EC50	1
128-37-0	Oc(c(cc(c1)C)C)c1	4.2	EC50	1
131-17-9	Oc(ccc(c1)C)c1	7	EC50	1
131-57-7	Oc(cccc1)c1	15	EC50	0
134-96-3	COc1c(Cl)cc(OC)cc1	17	EC50	0
135-19-3	OCc(cccc1)c1	230	EC50	0
139-13-9	BrC(c1ccccc1)=C	0.33	EC50	1
139-85-5	c(cccc1)(c1)C(Cl)Cl	22	EC50	0
140-66-9	FC(F)(F)c(cccc1)c1	3.1	EC50	1
140-88-5	Fc1c(F)cc(Br)cc1	6.3	EC50	1
141-32-2	Clc(c(Cl)c(Cl)c1C(Cl)=C(Cl)Cl)c(Cl)c1Cl	0.0058	EC50	1
141-43-5	c(cc(cc1Cl)Cl)(c1)Cl	2.9	EC50	1
142-96-1	c(ccc(c1Cl)Cl)(c1)Cl	1.4	EC50	1
143-07-7	c(c(c(cc1)Cl)Cl)(c1)Cl	0.46	EC50	1
143-08-8	c(ccc(c1Cl)Cl)(c1)C	1.4	EC50	1
148-24-3	c(ccc(c1)Cl)(c1)Cl	2.5	EC50	1
149-31-5	c(c(ccc1)Cl)(c1)C	0.7	EC50	1
150-19-6	c(cccc1Cl)(c1)Cl	2.5	EC50	1
156-59-2	c(c(ccc1)Cl)(c1)Cl	1.4	EC50	1
156-60-5	O(c(c(OC)cc(c1)CC=C)c1)C	38	EC50	0
205-82-3	c(C(=C)C)(cccc1)c1	2.6	EC50	1
260-94-6	c(ccc(c1)C)(c1)C(C)(C)C	1.5	EC50	1
298-06-6	c(ccc(c1)C)(c1)C(C)C	1.9	EC50	1
298-12-4	c(c(ccc1)C)(c1)C	1.1	EC50	1
334-48-5	c(cccc1)(c1)C	41	EC50	0
348-61-8	O=P(OCC(Br)CBr)(OCC(Br)CBr)OCC(Br)CBr	4.2	EC50	1
462-08-8	O=P(OCCCC)(OCCCC)OCCCC	7.6	EC50	1
464-72-2	O(P(OCC)(S)=S)CC	4.5	EC50	1
479-27-6	O=C(OCC(O1)C1)C(=C)C	25	EC50	0
611-19-8	O(C1COCCCCOCC(O2)C2)C1	22	EC50	0
615-58-7	O(C1C(CC(O2)C2C3)C3)C1	58	EC50	0
618-62-2	O=C(OOC(C)(C)C)C(CCCC)CC	3.9	EC50	1
623-15-4	O=C(NCCCCCCCCCC1)C1	65	EC50	0
634-83-3	O=CN(C)C	>1000	EC50	0
634-93-5	N(O)=C(CC)C	200	EC50	0
638-16-4	N#CC(=C)C	250	EC50	0
688-84-6	C(#N)C(Cl)(Cl)Cl	0.044	EC50	1
693-98-1	OC(CC(NC1(C)C)(C)C)C1	100	EC50	0
732-26-3	OCCN	97	EC50	0
763-69-9	N(NNN1)C1N	17	EC50	0
764-13-6	N(CCNC1)C1	110	EC50	0
782-74-1	N(CCN(C)C)(CCN(C)C)C	51	EC50	0
786-19-6	N(CCNCCNCCN)CCN	13	EC50	0
818-61-1	N(CCCCCCN(C)C)(C)C	78	EC50	0
825-44-5	NC(C(CC(C1)CC(CCC(N)C2C)C2)C)C1	4.6	EC50	1
827-43-0	NCCCCCCN	27	EC50	0
827-52-1	N(CC)(CC)CC	34	EC50	0
882-33-7	N(CC)CC	58	EC50	0
947-04-6	NC(CCCC1)C1	36	EC50	0
1013-23-6	O=C(O)CN(CCN(CC(=O)O)CC(=O)O)CC(=O)O	57	EC50	0
1151-97-9	O=C(O)CN(CC(=O)O)CC(=O)O	110	EC50	0
1194-98-5	O=C(O)CCCCC(=O)O	46	EC50	0
1335-46-2	O=C(O)C(=O)O	15	EC50	0
1477-55-0	O=CC(=O)O	51	EC50	0
1484-13-5	O=C(O)CO	44	EC50	0
1489-63-0	O=C(O)C=CC=CC	70	EC50	0
1502-22-3	O=C(O)C=C	47	EC50	0
1516-32-1	CCCCCCCCCC(=O)O	>20	EC50	0
1643-20-5	O=C(O)CCCCCC	72	EC50	0
1678-91-7	O=C(O)C(CC)CC	72	EC50	0
1740-19-8	O=C(OCCCC)C=C	5.2	EC50	1
1982-47-4	O=C(OCCN(C)C)C(=C)C	33	EC50	0
2051-60-7	O=C(OCCN(CC)CC)C(=C)C	360	EC50	0
2051-61-8	O=C(OCC(F)(F)F)C(=C)C	22	EC50	0
2100-42-7	O=C(OCC(CCCC)CC)C(=C)C	4.6	EC50	1
2219-82-1	O=C(OCCCC)C(=C)C	25	EC50	0
2232-08-8	O=C(OC)C(=C)C	84	EC50	0
2243-62-1	O=C(OCC(OC(=O)C)COC(=O)C)C	770	EC50	0
2403-88-5	O=C(OCCOCCOCCOC(=O)C(CC)CC)C(CC)CC	28	EC50	0
2409-55-4	O=C(OCCCCCCOC(=O)C=C)C=C	2.7	EC50	1
2425-79-8	O=C(OCC)CCOCC	>92	EC50	0
2668-24-8	O=C(OCCOCC)C	200	EC50	0
2741-06-2	COCC(OC(=O)C)C	370	EC50	0
2764-72-9	O=C(OCC)C(Cl)(Cl)Cl	160	EC50	0
2840-28-0	O=C(OCC)C(Cl)C	30	EC50	0
2867-47-2	O=C(OC)CCCCCCCCCCC	0.23	EC50	1
2973-78-6	O=C(OCC(C)C)C	25	EC50	0
3006-82-4	O=C(C=C(CC1(C)C)C)C1	220	EC50	0
3295-94-1	O=C(C(C(=CCCC1)C1)CCC2)C2	20	EC50	0
3452-97-9	O=C(CCCCCCCCCCC)C	0.5	EC50	1
3486-12-3	O=C(CCCCCCCCC)C	1.3	EC50	1
3547-04-4	O=C(CCCCCCCC)C	3.5	EC50	1
3648-21-3	O=CC(CCC)C	15	EC50	0
4170-30-3	O=CCCCC	32	EC50	0
4189-44-0	OC(C=C)(CCC=C(CCC=C(C)C)C)C	0.96	EC50	1
4798-44-1	OC(C=C)(CCC=C(C)C)C	52	EC50	0
5329-12-4	OC(C=C)CCC	210	EC50	0
5394-18-3	OC(CC=C)C=C	26	EC50	0
5405-58-3	OCC=C(C)C	170	EC50	0
5510-99-6	O(CCCCCC)C(OCCCCCC)C	0.28	EC50	1
6099-79-2	C(COCC=C)CCCC	2.4	EC50	1
6117-91-5	C(Cl)(Cl)(Cl)C(Cl)COCC(Cl)C(Cl)(Cl)Cl	0.078	EC50	1
6362-80-7	O1C(C)(C)CCC1(C)C	200	EC50	0
6807-17-6	O(CCC(C)C)CCC(C)C	2.3	EC50	1
10500-57-9	OCCO	>1100	EC50	0
13048-33-4	OC(CCl)CCl	730	EC50	0
14315-14-1	OCCCCCCCCCCCCC	0.61	EC50	1
14802-03-0	OCCCCCCCCCC	1.4	EC50	1
15045-43-9	OCCC(CC(C)(C)C)C	6.8	EC50	1
15245-44-0	OCCCCCCCCC	5.7	EC50	1
16219-75-3	OCCCCCCC	56	EC50	0
19398-61-9	OCCCC	>1000	EC50	0
19715-19-6	OC(C)C	>1000	EC50	0
22720-75-8	C(=C(C(=C1Cl)Cl)Cl)(C1(Cl)Cl)Cl	0.0091	EC50	1
23184-66-9	C(C(Cl)CCl)=C	10.`	EC50	0
25013-16-5	BrC(F)(F)C(Cl)(F)C=C	2.5	EC50	1
25103-58-6	C(C=C)(=C)CCC=C(C)C	0.45	EC50	1
25155-23-1	C(C(C=CC12)C1)(=CC)C2	3.3	EC50	1
25321-09-9	C(=CCCC1C=C)C1	1.9	EC50	1
25339-17-7	C(=CCCC=CC1)C1	0.87	EC50	1
25377-73-5	C(=CC=C(C)C)(C)C	4.2	EC50	1
25675-28-9	C(C=C)(=C)C	3.2	EC50	1
27176-87-0	C(=C(Cl)Cl)(Cl)Cl	1.3	EC50	1
29082-74-4	C(=CCl)Cl	40	EC50	0
30171-80-3	CC(C)CC(C)CC(C)C=CC	0.015	EC50	1
31127-54-5	C(=C)CCCCCCCCCC	0.38	EC50	1
32598-13-3	BrCC(Br)CCl	19	EC50	0
33813-20-6	BrC(Br)Cl	27	EC50	0
35065-27-1	FC(F)(C(F)(Cl)Cl)Cl	4.3	EC50	1
37680-65-2	BrCCCBr	8.8	EC50	1
37680-73-2	BrC(C)C	23	EC50	0
51218-49-6	C(Cl)(Cl)(Cl)Cl	8.1	EC50	1
52829-07-9	ClCC(Cl)C	30	EC50	0
57500-00-2	C(Cl)(Cl)C	34	EC50	0
68972-96-3	C(C(CCC1)CCC2)(C1)C2	0.23	EC50	1
74553-29-0	C(CCC(C1)C(C)C)(C1)C	0.12	EC50	1
76334-36-6	CCC1CCCCC1	0.67	EC50	1
85068-29-7	C(CCCCCCCCC)C	0.011	EC50	1
85785-20-2	C(CCCCCC)C	0.18	EC50	1
